# Supplementary material (part 8 of 9)
Source: ML conference proceedings conference paper supplement (https://openreview.net/forum?id=qiAxL3Xqx1o)

# epoch\_4599\_0.4.pdf

e=14, n=9

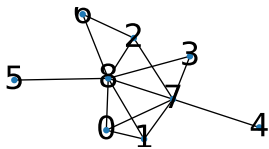

e=10, n=9

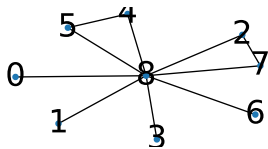

e=10, n=9

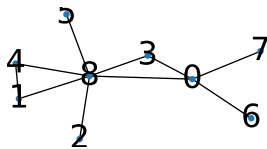

e=12, n=9

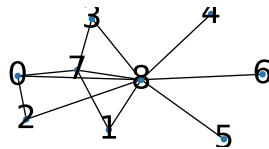

e=14, n=8

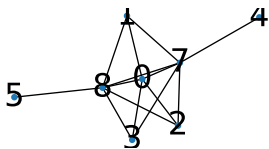

e=8, n=9

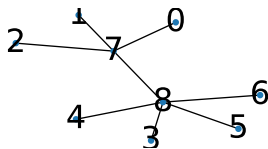

e=15, n=9

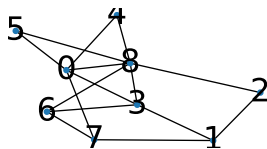

e=10, n=9

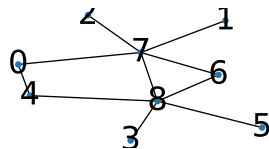

e=11, n=8

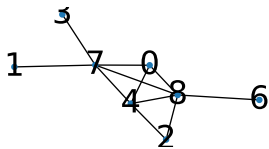

e=12, n=9

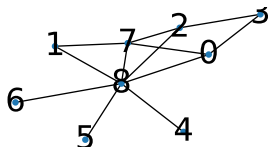

e=10, n=9

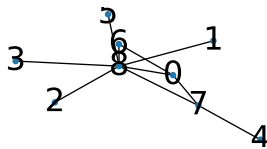

e=14, n=9

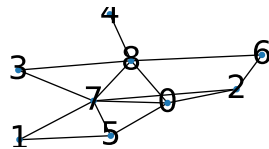

e=14, n=9

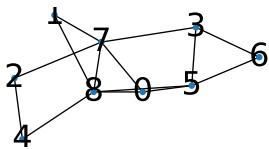

e=11, n=9

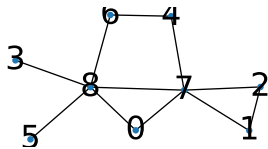

e=11, n=9

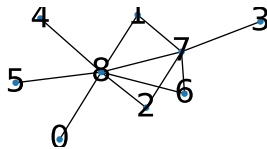

e=10, n=9

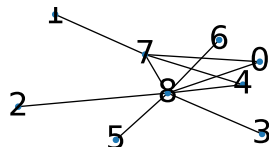

Supplement: supplementary_material [file attachment]

e=64, n=20

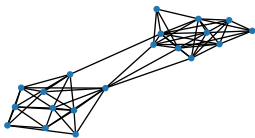

$e=62, n=20$

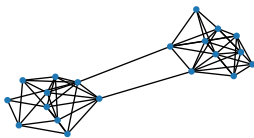

e=62, n=20

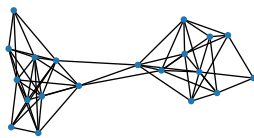

e=61, n=20

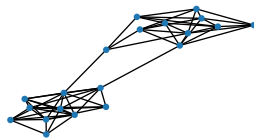

$e=60, n=20$

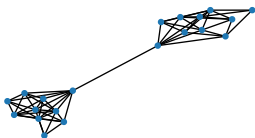
$$e=60, n=20$$
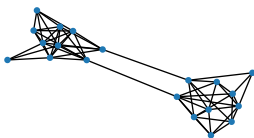

$e=60, n=20$

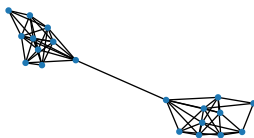

e=61, n=20

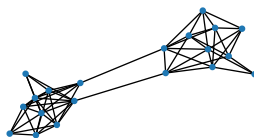

$e=63, n=20$

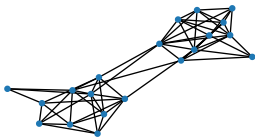

$e=60, n=20$

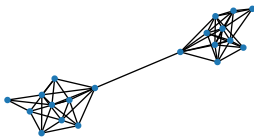

e=61, n=20

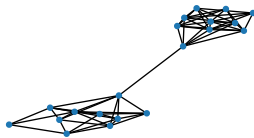

e=61, n=20

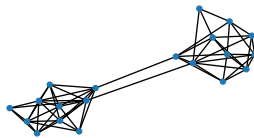

$e=62, n=20$

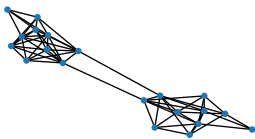

$e=62, n=20$

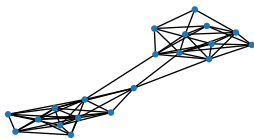

e=62, n=20

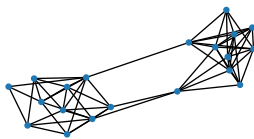

e=61, n=20

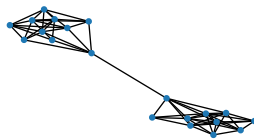

Supplement: supplementary_material [file attachment]

# epoch\_1399\_0.8\_init.pdf

e=18, n=9

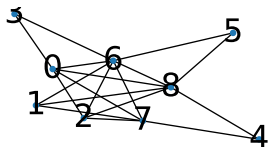

e=14, n=9

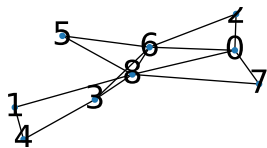

e=11, n=8

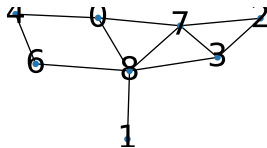

e=15, n=9

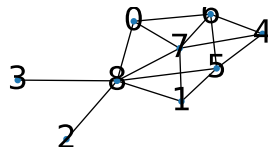

e=17, n=9

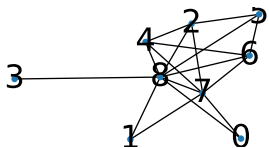

e=11, n=9

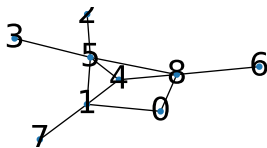

e=10, n=7

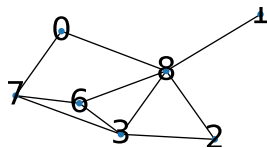

e=14, n=9

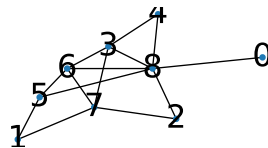

e=11, n=9

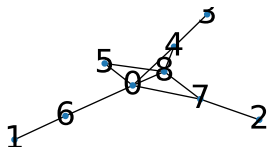

e=10, n=9

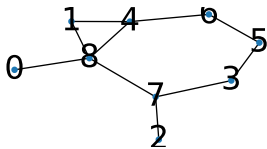

e=12, n=9

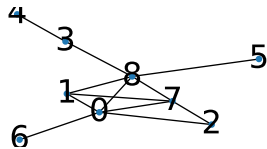

e=8, n=9

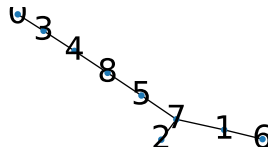

e=15, n=9

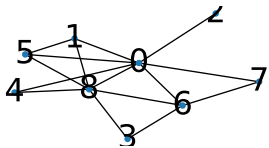

e=16, n=9

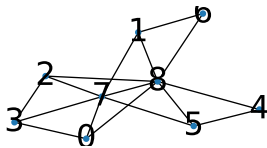

e=16, n=9

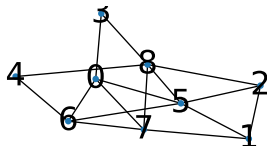

e=12, n=9

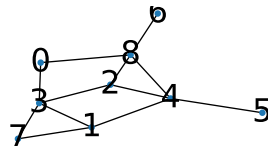

Supplement: supplementary_material [file attachment]

epoch 2999 1.6.pdf

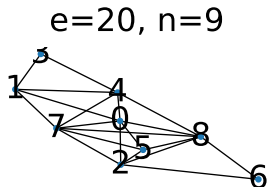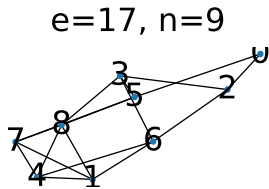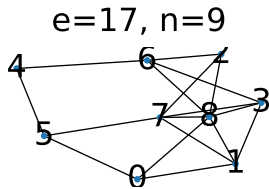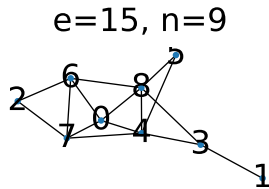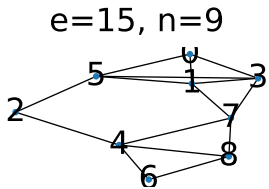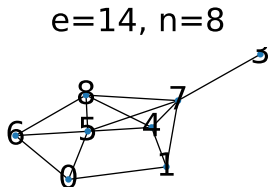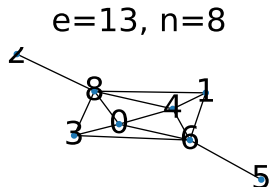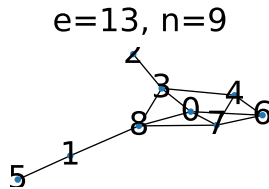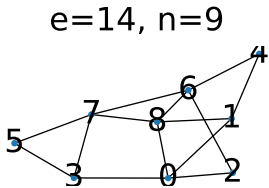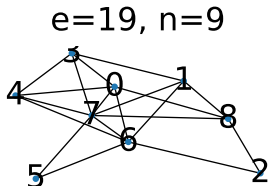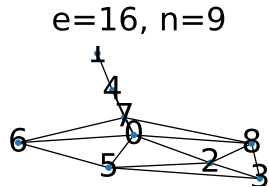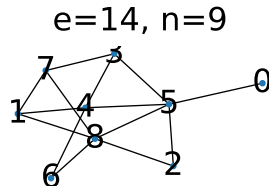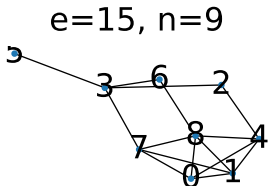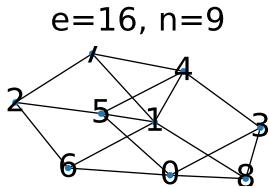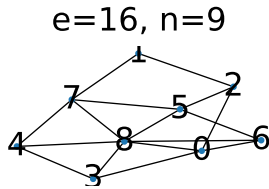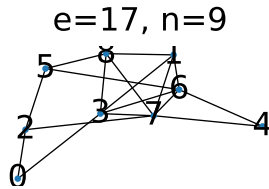

Supplement: supplementary_material [file attachment]

# epoch\_199\_0.1\_init.pdf

e=11, n=9

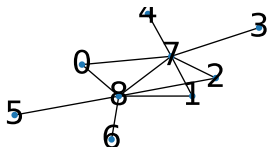

e=9, n=9

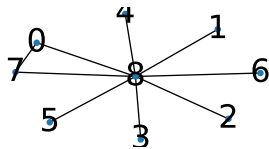

e=8, n=9

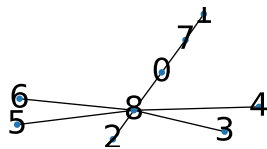

e=13, n=9

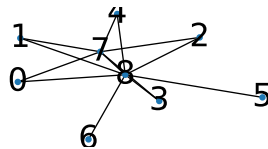

e=11, n=9

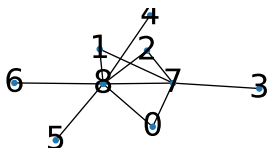

e=12, n=9

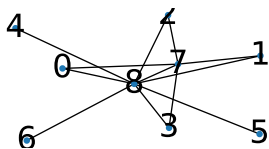

e=8, n=9

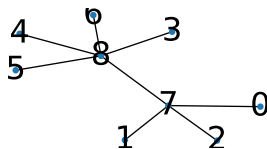

e=8, n=9

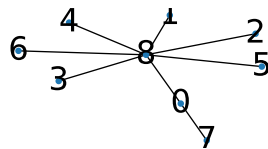

e=10, n=9

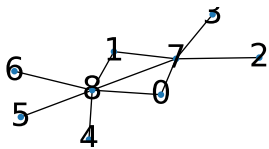

e=8, n=9

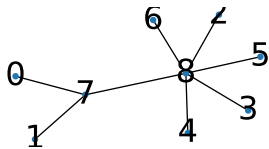

e=9, n=9

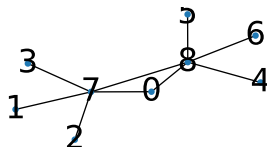

e=11, n=9

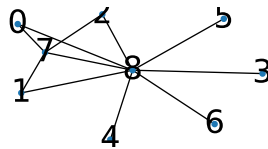

e=8, n=9

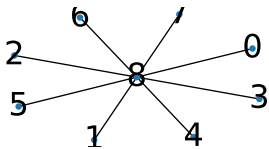

e=10, n=9

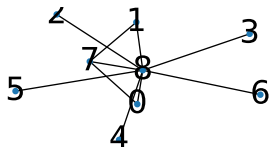

e=9, n=9

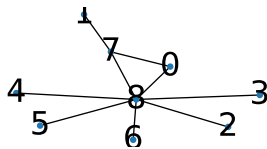

e=10, n=9

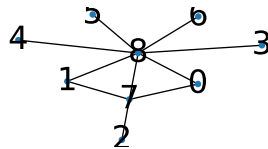

Supplement: supplementary_material [file attachment]

# epoch\_4799\_0.6\_init.pdf

e=14, n=9

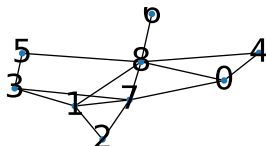

e=17, n=9

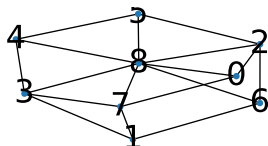

e=11, n=8

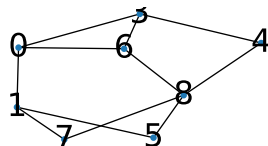

e=16, n=9

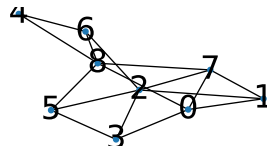

e=11, n=9

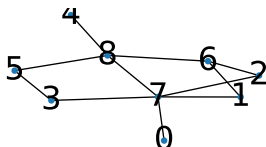

e=17, n=9

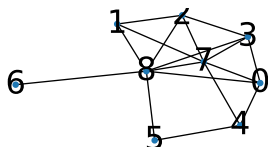

e=12, n=9

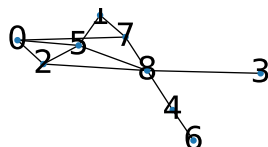

e=10, n=9

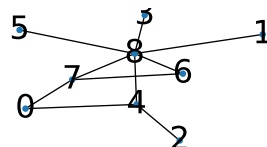

e=17, n=9

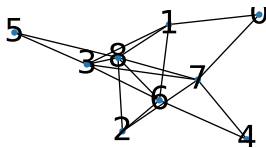

e=9, n=9

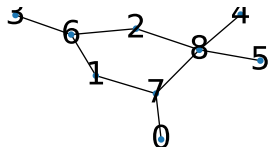

e=11, n=8

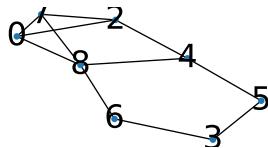

e=15, n=9

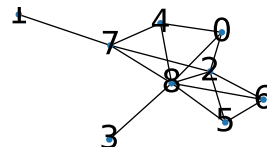

e=10, n=9

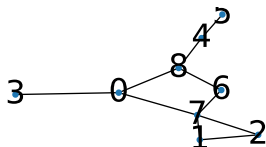

e=14, n=9

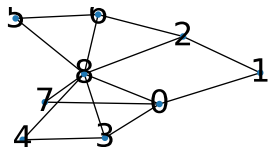

e=12, n=9

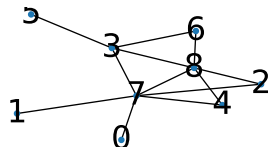

e=14, n=9

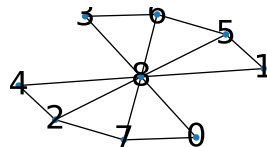

Supplement: supplementary_material [file attachment]

e=72, n=20

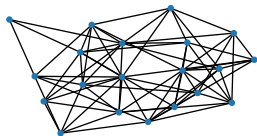

e=80, n=20

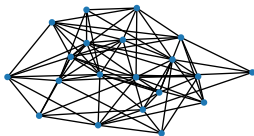

e=75, n=20

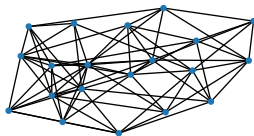

e=68, n=20

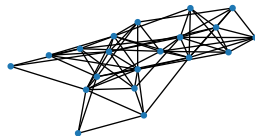

e=75, n=20

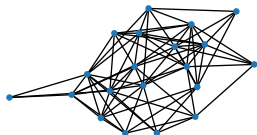

e=80, n=20

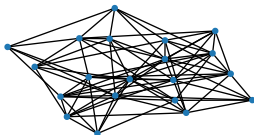

e=76, n=20

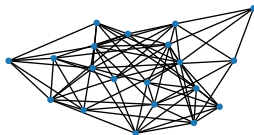

e=76, n=20

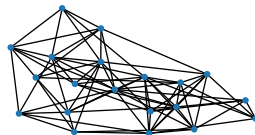

e=76, n=20

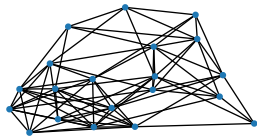

e=67, n=20

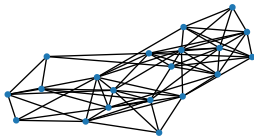

e=67, n=20

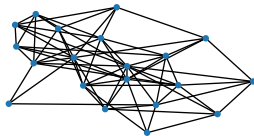

e=72, n=20

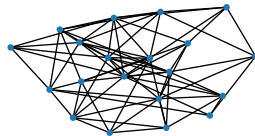

e=88, n=20

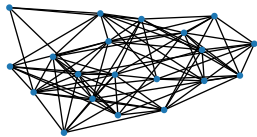

e=64, n=20

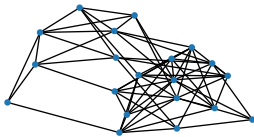

e=71, n=20

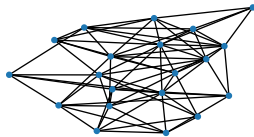

e=74, n=20

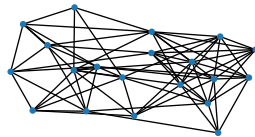

Supplement: supplementary_material [file attachment]

# epoch\_3799\_0.8\_init.pdf

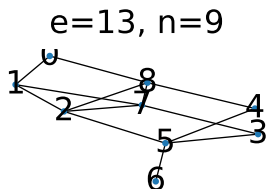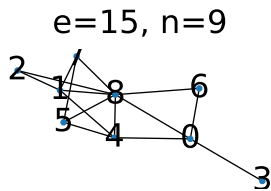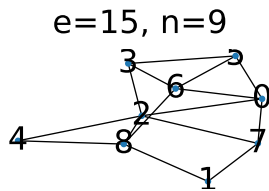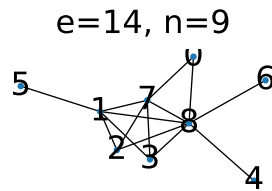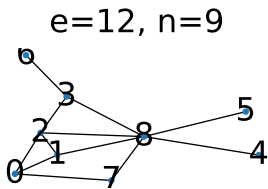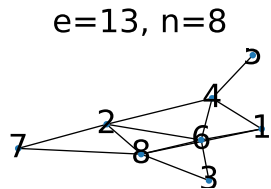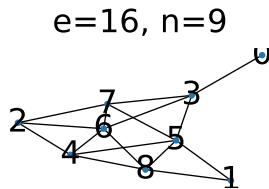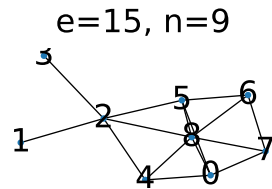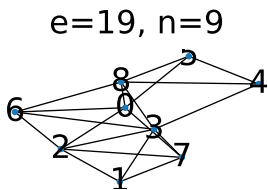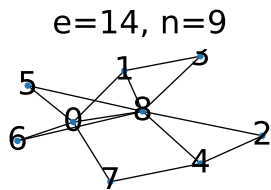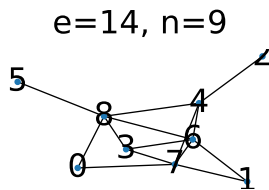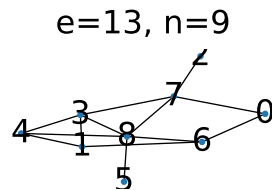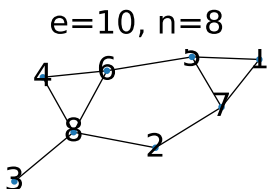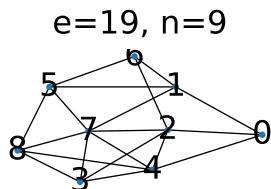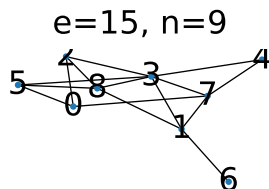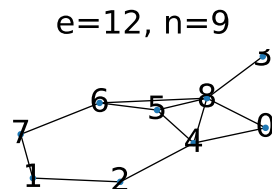

Supplement: supplementary_material [file attachment]

epoch\_2599\_0.8.pdf

$$e=14, n=8$$
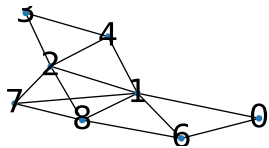
$$e=15, n=9$$
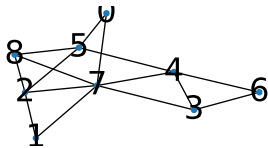
$$e=13, n=9$$
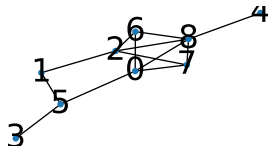
$$e=14, n=9$$
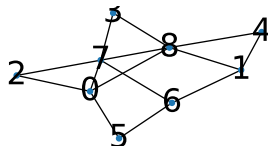
$$e=14, n=9$$
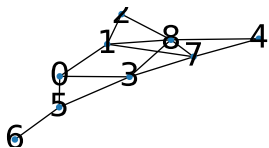

$e=16, n=9$

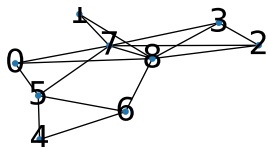
$$e=17, n=9$$
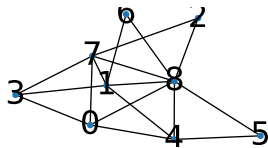
$$e=11, n=9$$
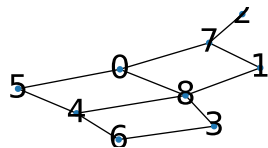
$$e=15, n=9$$
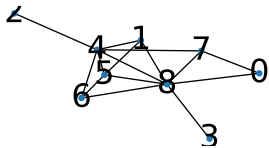

e=17, n=9

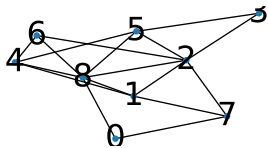
$$e=18, n=9$$
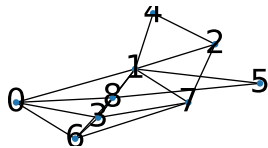

e=20, n=9

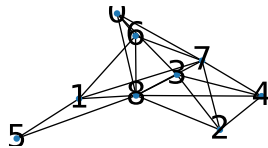
$$e=13, n=8$$
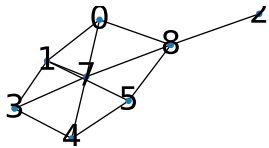
$$e=18, n=9$$
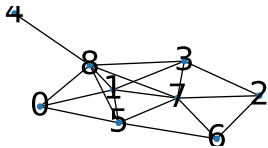
$$e=15, n=9$$
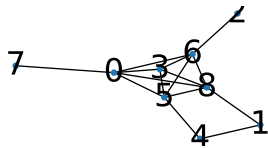
$$e=14, n=9$$
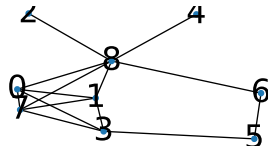

Supplement: supplementary_material [file attachment]

# epoch\_1399\_0.8.pdf

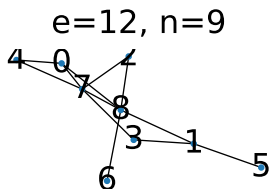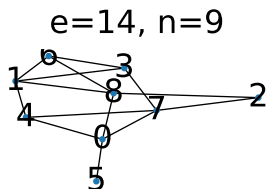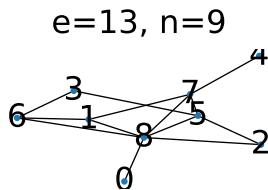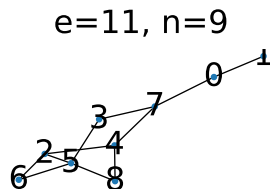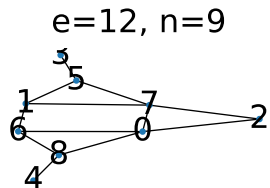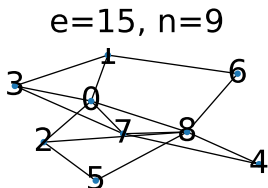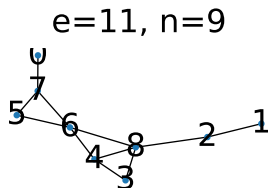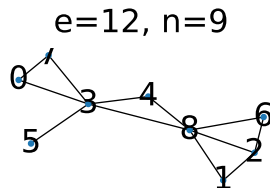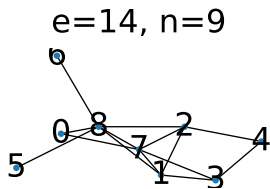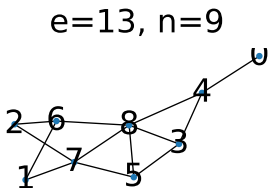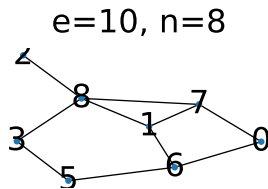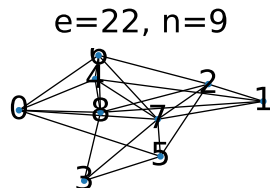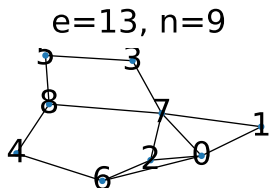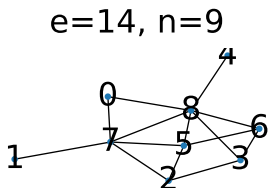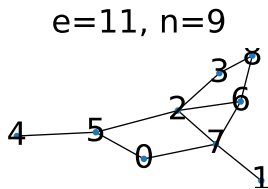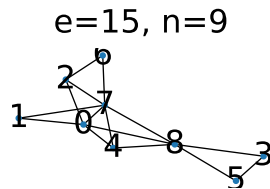

Supplement: supplementary_material [file attachment]

# epoch\_799\_0.6\_init.pdf

e=14, n=8

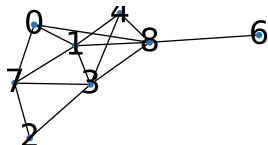

e=16, n=9

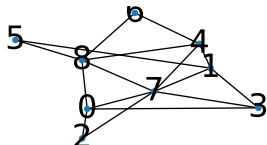

e=13, n=9

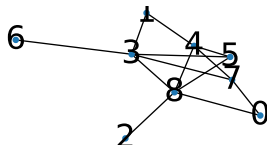

e=13, n=9

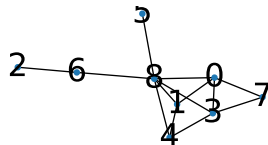

e=18, n=9

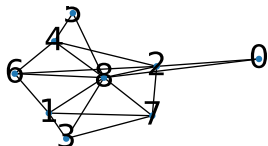

e=11, n=8

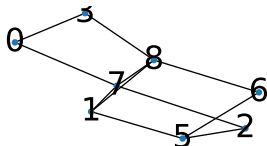

e=12, n=9

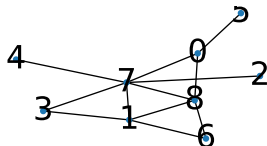

e=5, n=6

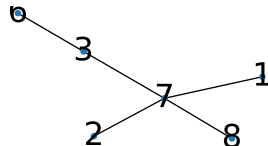

e=12, n=8

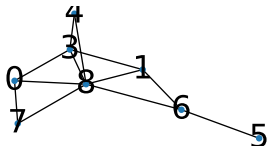

e=13, n=9

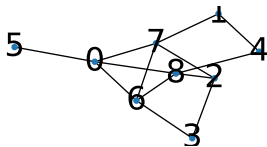

e=14, n=9

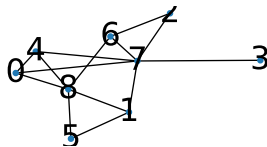

e=15, n=9

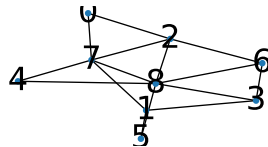

e=16, n=9

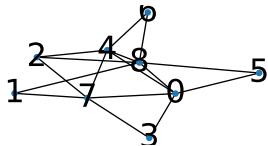

e=13, n=9

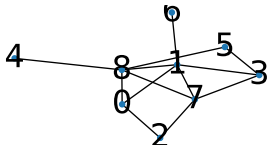

e=12, n=8

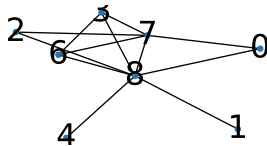

e=16, n=9

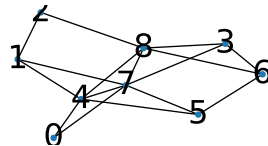

Supplement: supplementary_material [file attachment]

# epoch\_1799\_0.2\_init.pdf

e=9, n=9

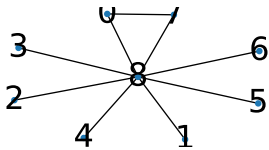

e=8, n=9

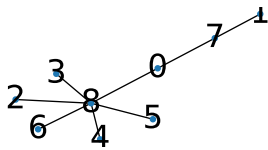

e=12, n=9

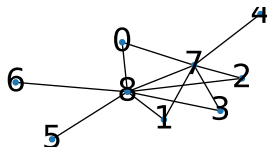

e=11, n=9

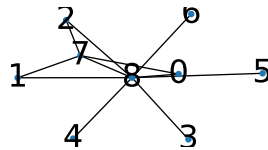

e=7, n=8

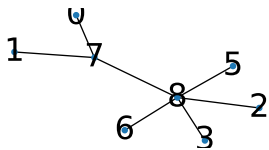

e=10, n=9

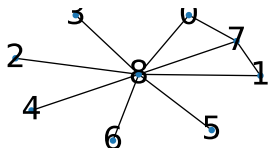

e=10, n=9

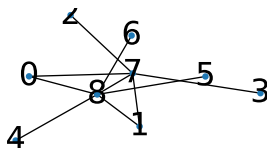

e=9, n=9

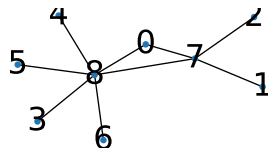

e=13, n=9

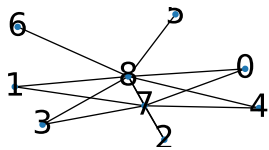

e=10, n=9

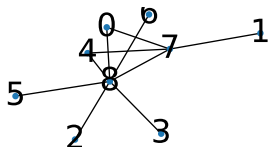

e=8, n=9

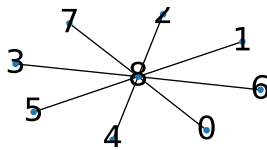

e=8, n=9

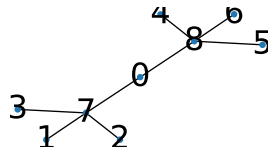

e=9, n=9

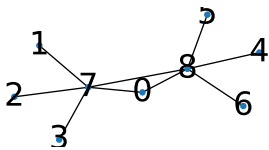

e=12, n=9

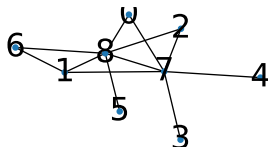

e=9, n=9

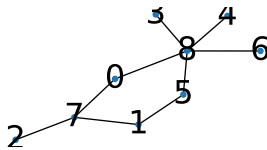

e=8, n=9

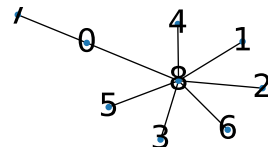

Supplement: supplementary_material [file attachment]

# epoch\_2999\_0.6.pdf

e=9, n=8

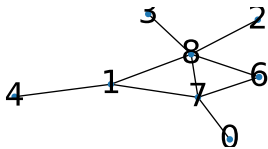

e=14, n=9

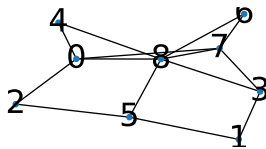

e=15, n=9

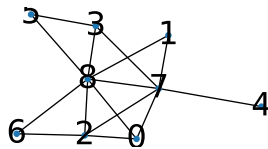

e=14, n=9

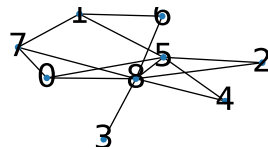

e=10, n=9

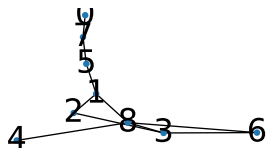

e=16, n=9

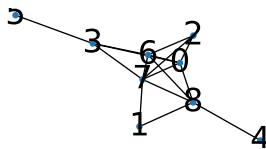

e=12, n=9

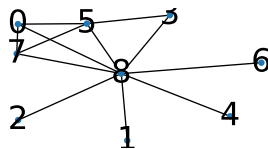

e=10, n=8

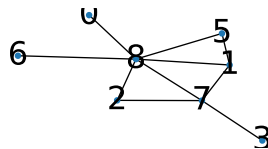

e=11, n=9

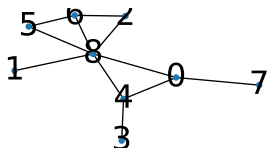

e=17, n=9

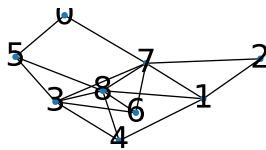

e=14, n=8

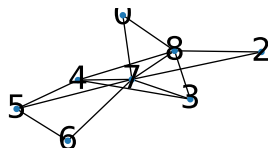

e=13, n=9

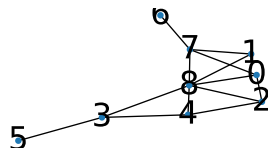

e=15, n=9

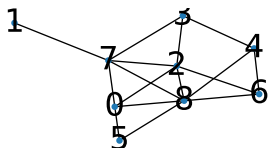

e=11, n=8

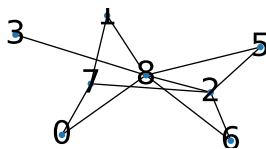

e=11, n=9

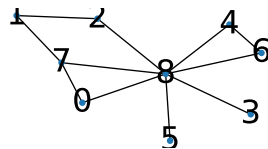

e=15, n=9

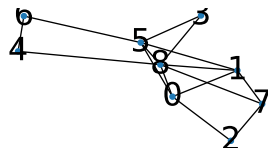

Supplement: supplementary_material [file attachment]

epoch\_2799\_0.4\_init.pdf

e=68, n=20

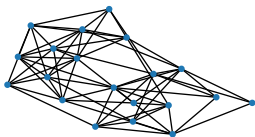

e=68, n=20

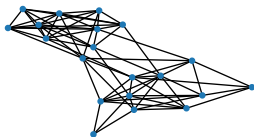

e=66, n=20

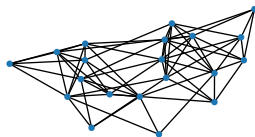

e=74, n=20

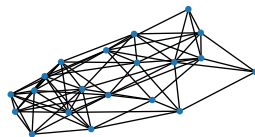

e=70, n=20

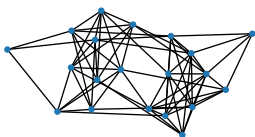

e=66, n=20

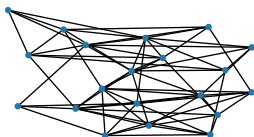

e=71, n=20

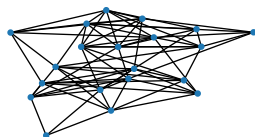

e=75, n=20

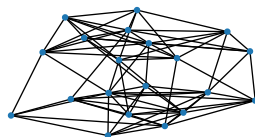

e=64, n=20

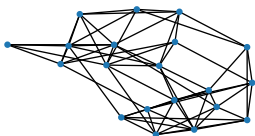

e=67, n=20

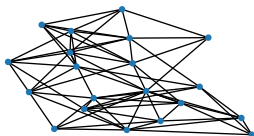

e=66, n=20

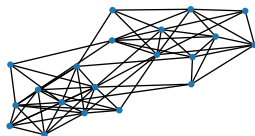

e=72, n=20

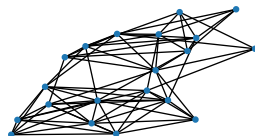

e=69, n=20

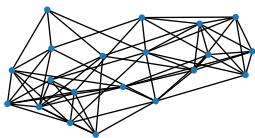

e=62, n=20

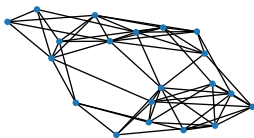

e=66, n=20

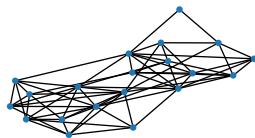

e=73, n=20

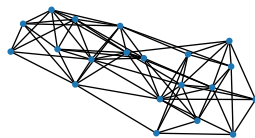

Supplement: supplementary_material [file attachment]

# epoch\_1599\_0.6\_init.pdf

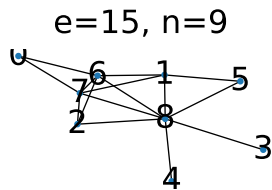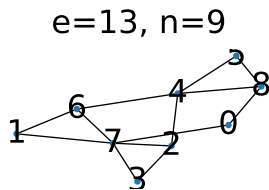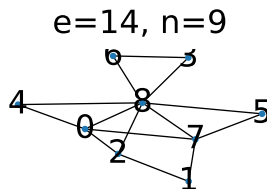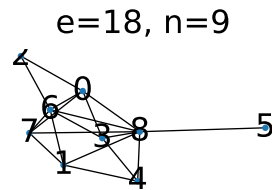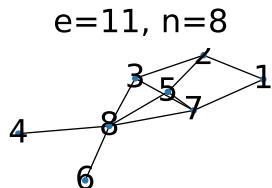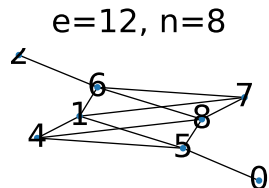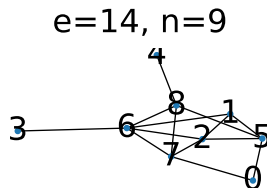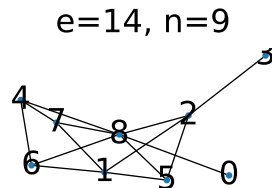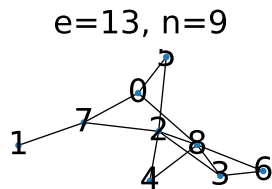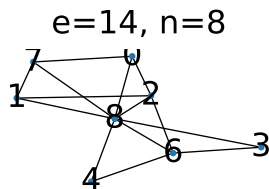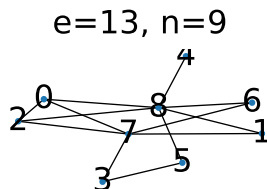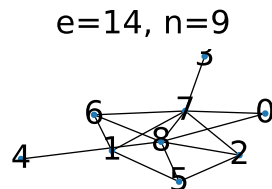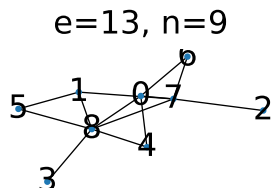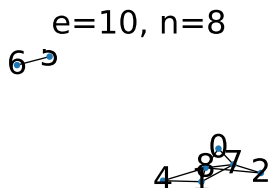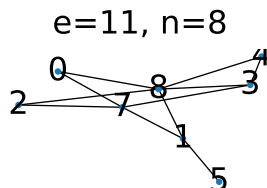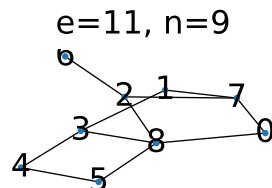

Supplement: supplementary_material [file attachment]

e=74, n=20

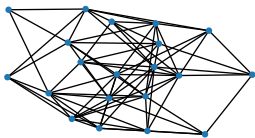

e=72, n=20

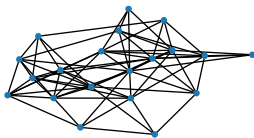

e=76, n=20

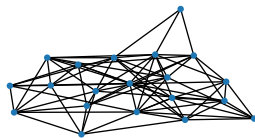

e=70, n=20

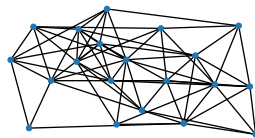

e=71, n=20

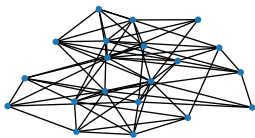

e=70, n=20

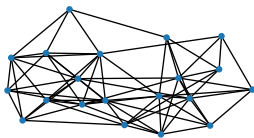

e=77, n=20

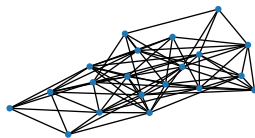

e=72, n=20

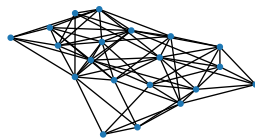

e=75, n=20

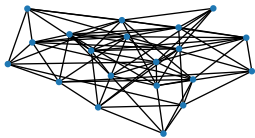

e=76, n=20

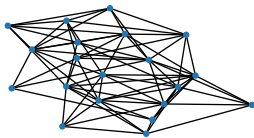

e=69, n=20

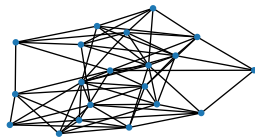

e=73, n=20

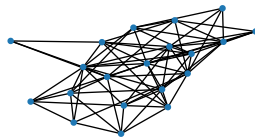

e=75, n=20

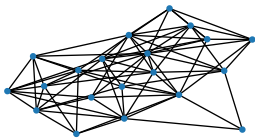

e=84, n=20

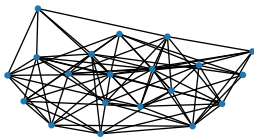

e=80, n=20

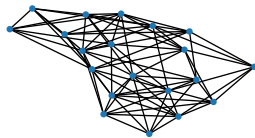

e=84, n=20

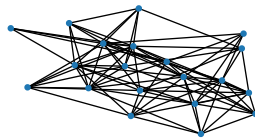

Supplement: supplementary_material [file attachment]

epoch\_2999\_1.6.pdf

$$e=19, n=9$$
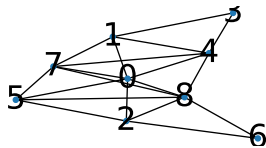
$$e=16, n=9$$
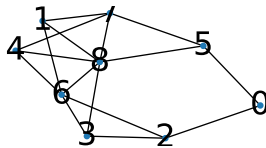
$$e=18, n=9$$
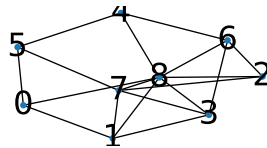
$$e=14, n=9$$
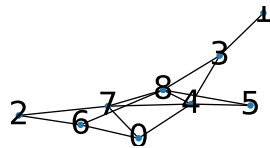
$$e=15, n=9$$
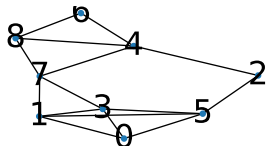
$$e=13, n=8$$
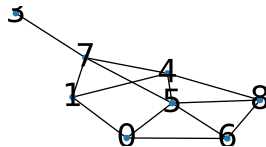
$$e=12, n=8$$
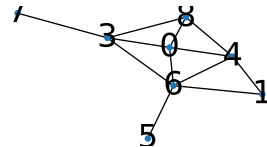

$e=13, n=9$

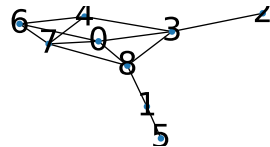

$e=16, n=9$

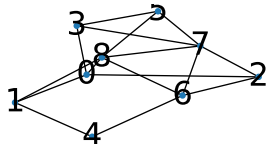

$e=19, n=9$

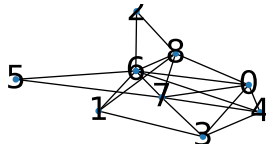

$e=14, n=9$

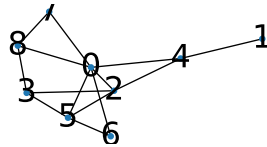
$$e=13, n=9$$
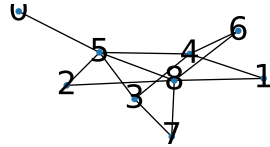
$$e=14, n=9$$
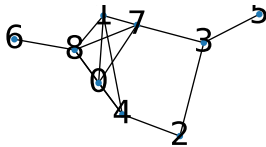

e=17, n=9

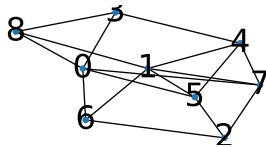
$$e=16, n=9$$
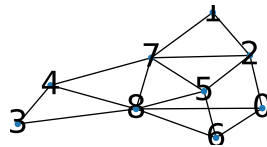
$$e=18, n=9$$
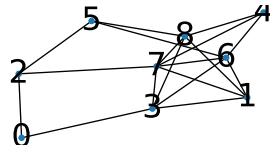

Supplement: supplementary_material [file attachment]

# epoch\_399\_0.1.pdf

e=10, n=8

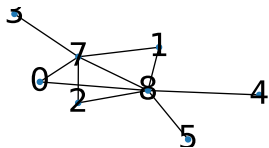

e=9, n=9

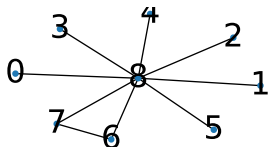

e=12, n=9

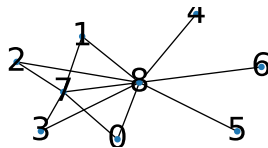

e=10, n=9

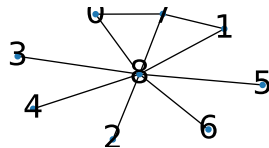

e=9, n=9

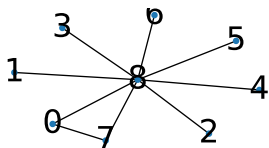

e=10, n=9

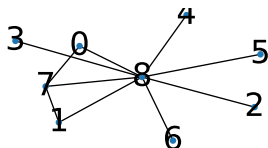

e=8, n=9

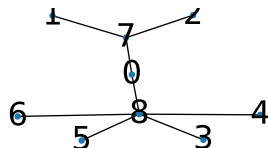

e=9, n=9

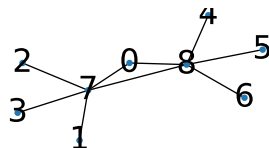

e=12, n=9

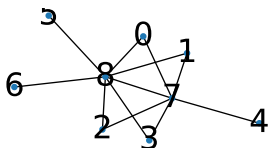

e=11, n=9

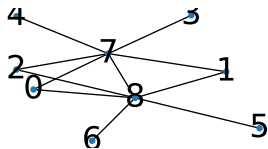

e=9, n=9

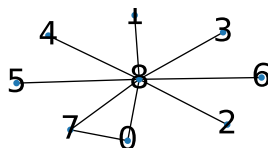

e=9, n=9

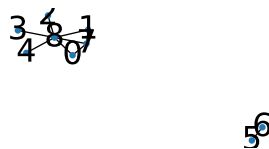

e=14, n=9

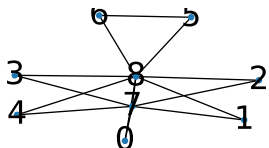

e=8, n=9

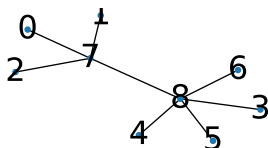

e=9, n=9

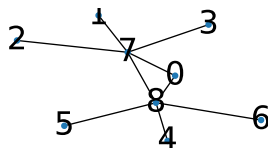

e=10, n=8

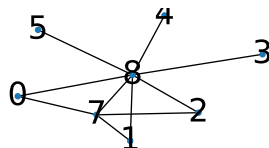

Supplement: supplementary_material [file attachment]

# epoch\_399\_0.6.pdf

e=12, n=9

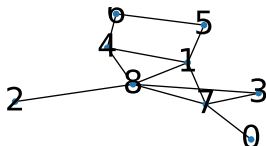

e=13, n=9

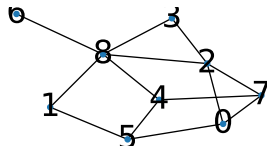

e=15, n=9

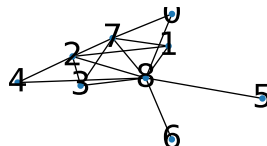

e=13, n=9

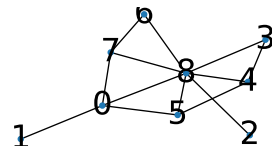

e=8, n=8

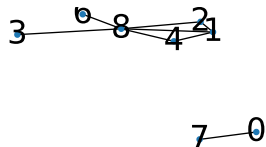

e=15, n=9

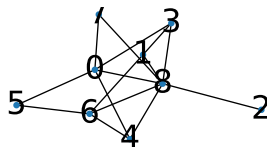

e=14, n=8

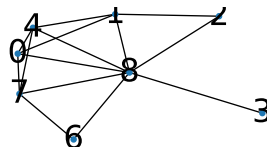

e=12, n=9

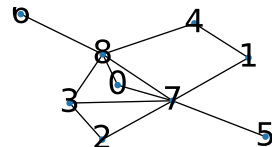

e=12, n=9

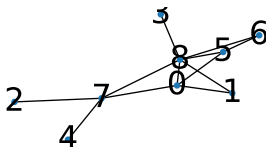

e=10, n=8

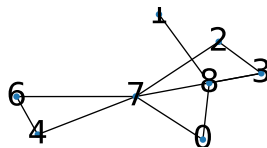

e=10, n=9

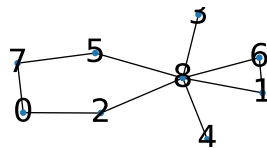

e=13, n=9

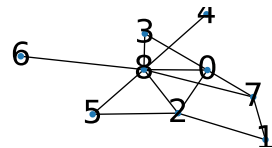

e=12, n=9

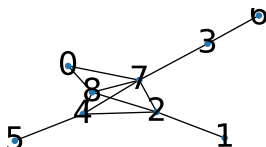

e=20, n=9

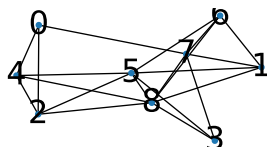

e=15, n=9

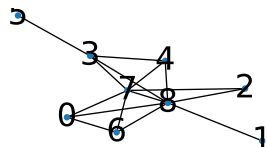

e=11, n=9

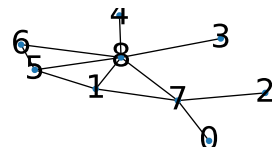

Supplement: supplementary_material [file attachment]

epoch\_3599\_0.2.pdf

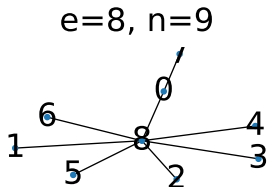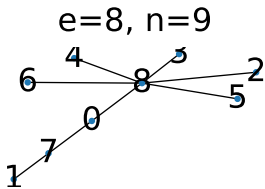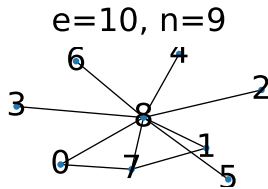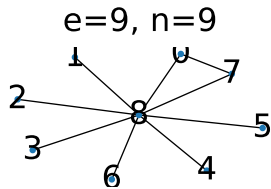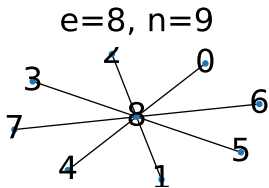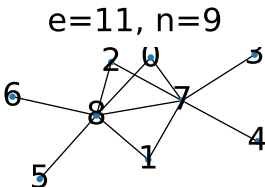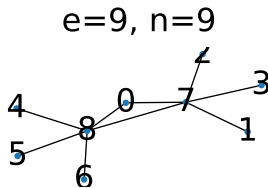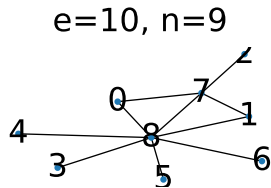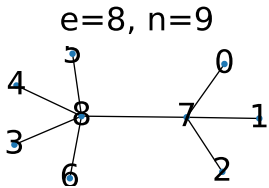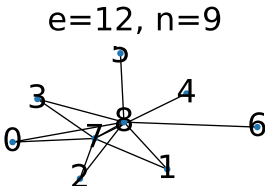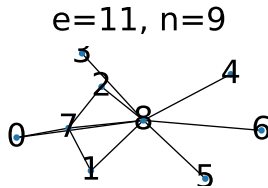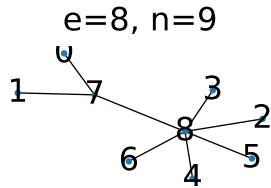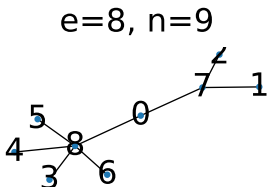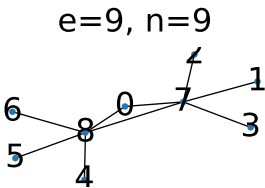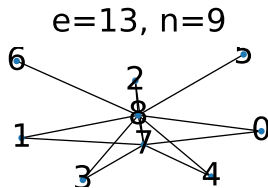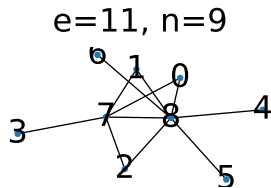

Supplement: supplementary_material [file attachment]

epoch\_1599\_0.2\_init.pdf

$e=60, n=20$

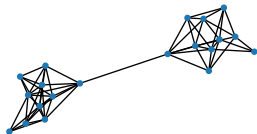

$e=60, n=20$

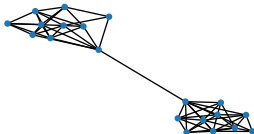

e=63, n=20

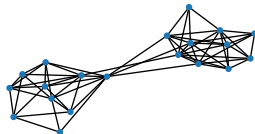

e=59, n=20

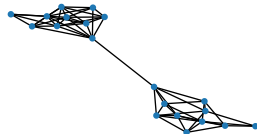

$e=60, n=20$

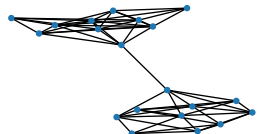

$e=60, n=20$

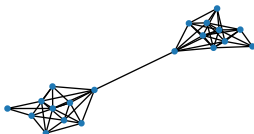

e=59, n=20

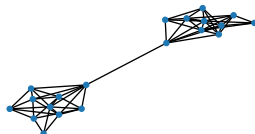

e=61, n=20

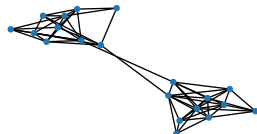

e=61, n=20

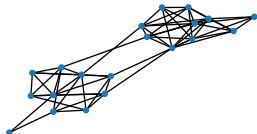

$e=60, n=20$

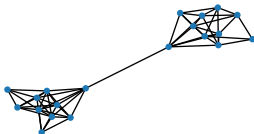

e=58, n=20

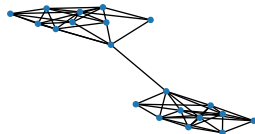

e=61, n=20

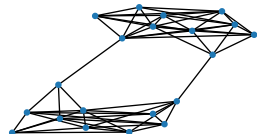

e=62, n=20

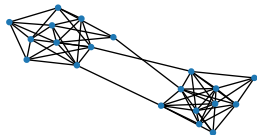

$e=60, n=20$

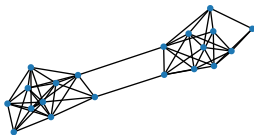

e=62, n=20

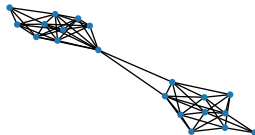

e=61, n=20

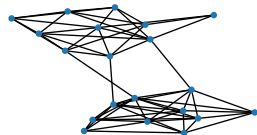

Supplement: supplementary_material [file attachment]

# epoch\_4799\_0.8\_init.pdf

e=15, n=9

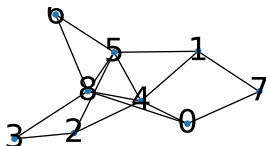

e=17, n=9

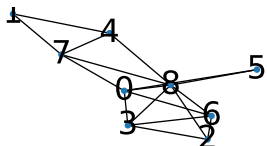

e=17, n=9

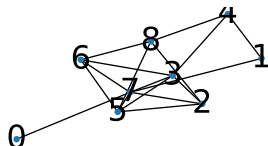

e=13, n=9

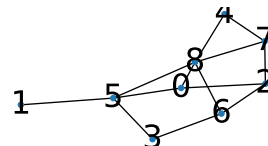

e=18, n=9

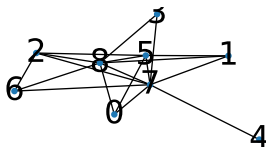

e=14, n=9

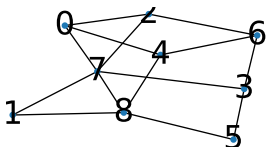

e=10, n=9

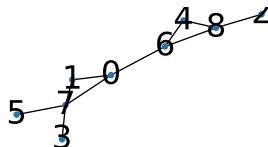

e=19, n=9

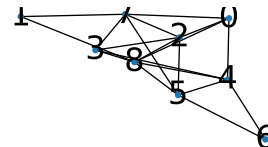

e=13, n=9

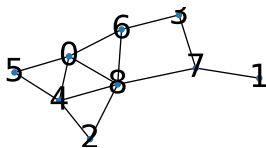

e=18, n=9

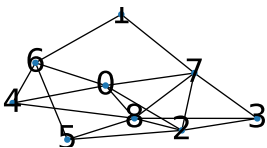

e=18, n=9

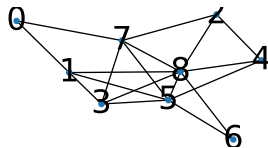

e=13, n=9

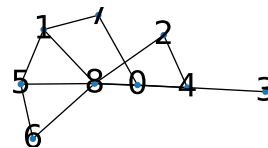

e=14, n=8

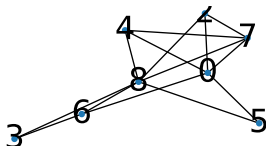

e=16, n=9

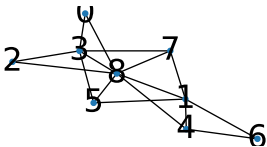

e=22, n=9

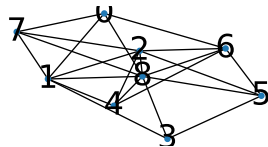

e=10, n=9

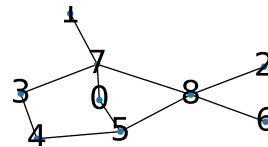

Supplement: supplementary_material [file attachment]

# epoch\_2999\_0.8\_init.pdf

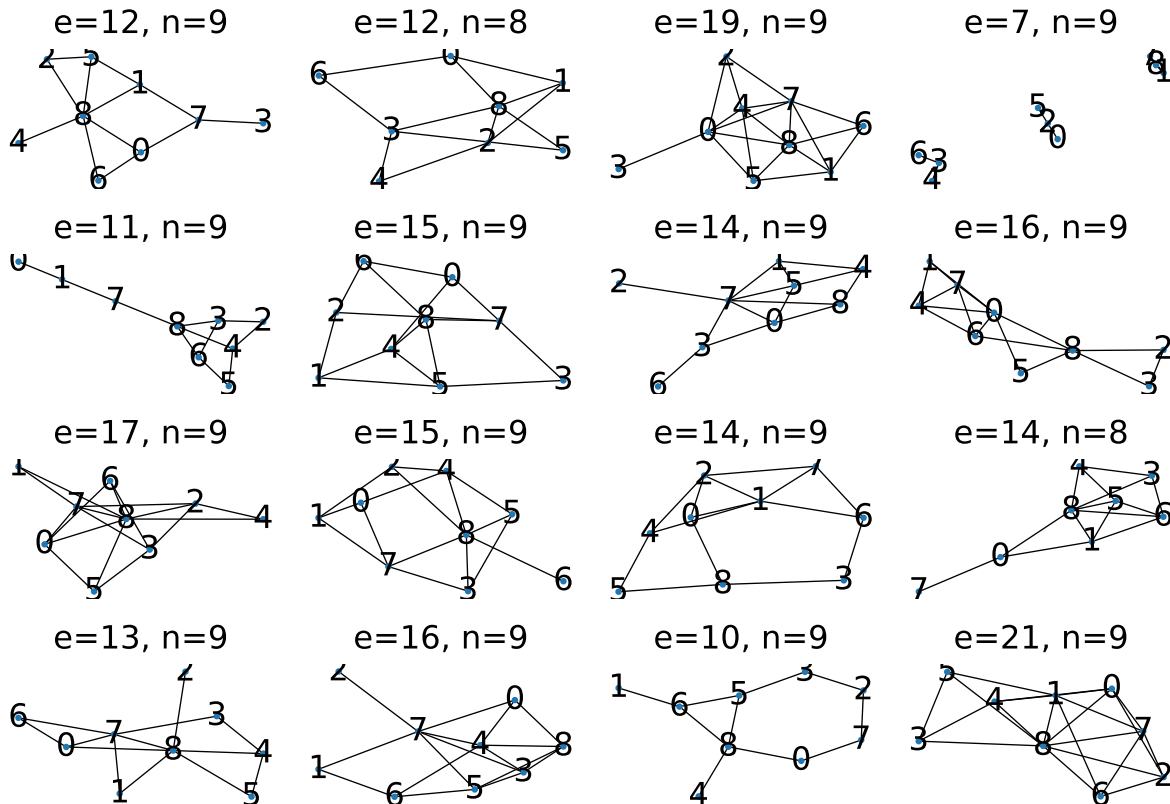

Supplement: supplementary_material [file attachment]

epoch 999 0.8.pdf

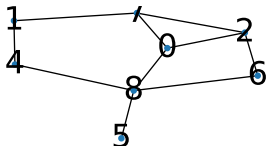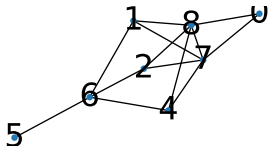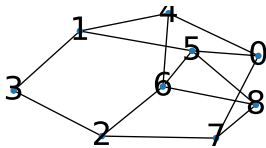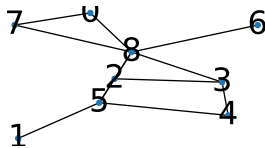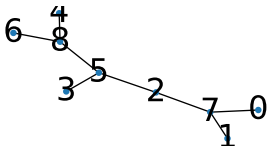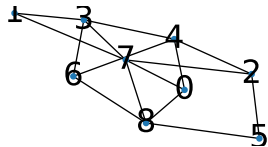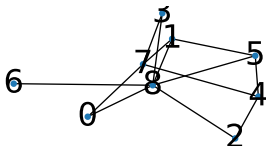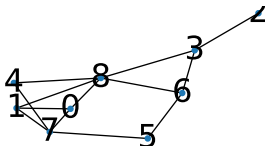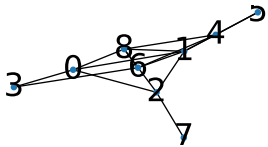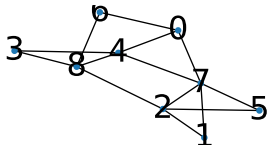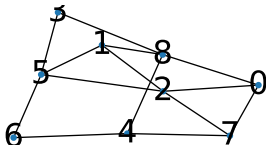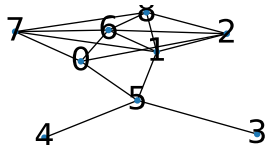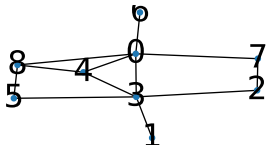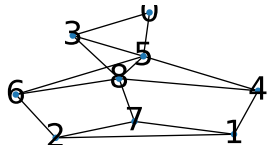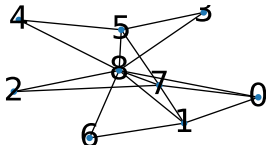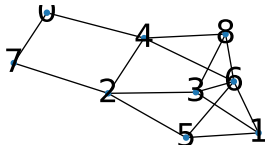

Supplement: supplementary_material [file attachment]

$e=67, n=20$

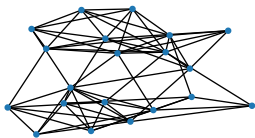

e=59, n=20

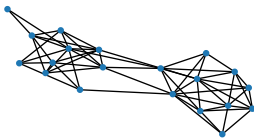

e=66, n=20

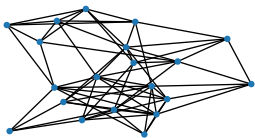

e=62, n=20

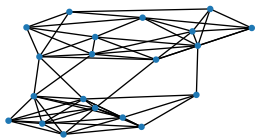

$e=60, n=20$

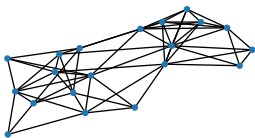

$e=73, n=20$

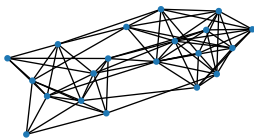

$e=70, n=20$

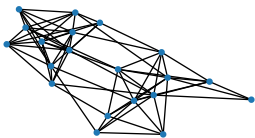

e=66, n=20

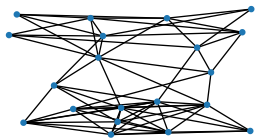

$e=65, n=20$

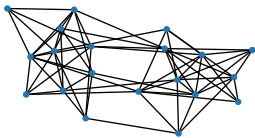

$e=65, n=20$

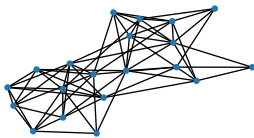

$e=70, n=20$

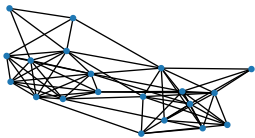

$e=65, n=20$

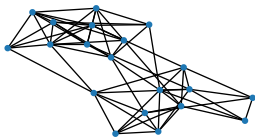

$e=65, n=20$

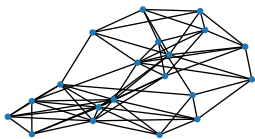

e=61, n=20

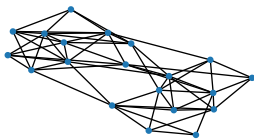

e=71, n=20

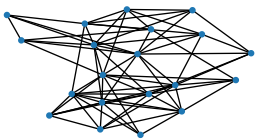

e=64, n=20

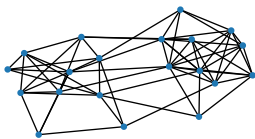

Supplement: supplementary_material [file attachment]

# epoch\_399\_0.1\_init.pdf

e=8, n=9

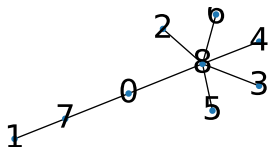

e=11, n=9

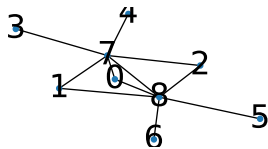

e=13, n=9

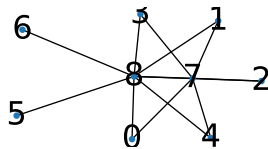

e=9, n=9

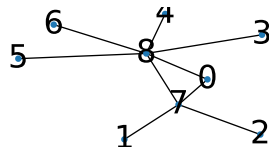

e=9, n=9

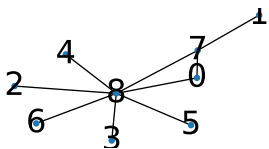

e=8, n=9

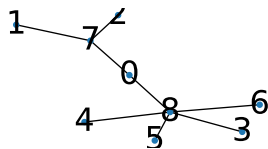

e=10, n=9

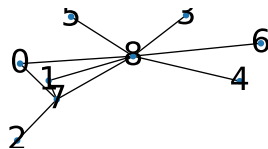

e=11, n=9

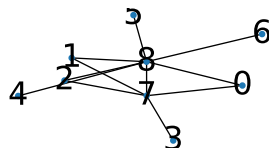

e=10, n=9

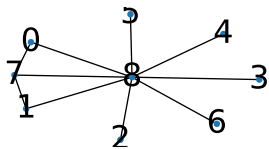

e=8, n=9

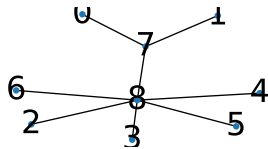

e=12, n=9

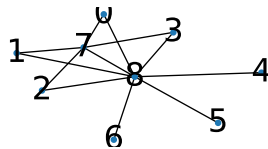

e=8, n=9

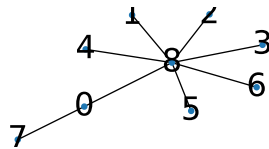

e=10, n=9

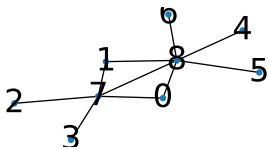

e=8, n=9

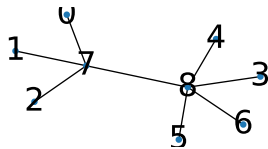

e=9, n=9

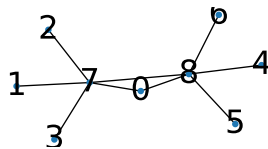

e=8, n=9

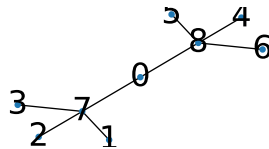

Supplement: supplementary_material [file attachment]

# epoch\_799\_0.2\_init.pdf

e=9, n=9

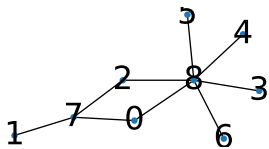

e=10, n=9

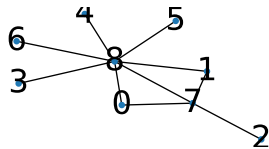

e=9, n=9

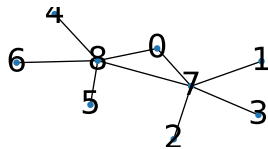

e=7, n=8

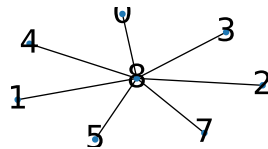

e=12, n=9

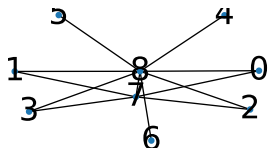

e=11, n=9

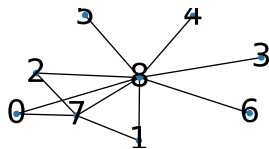

e=11, n=9

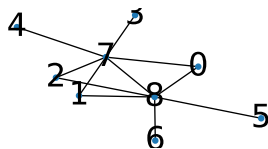

e=11, n=9

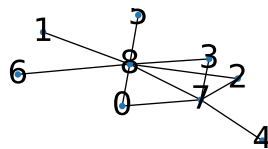

e=8, n=9

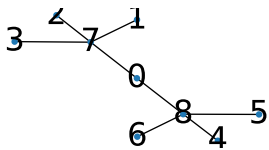

e=13, n=9

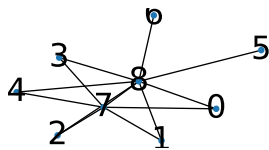

e=9, n=9

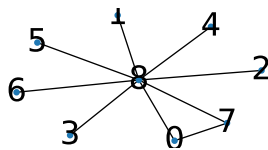

e=11, n=9

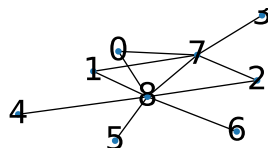

e=8, n=9

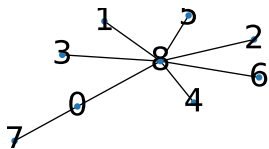

e=8, n=9

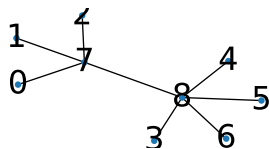

e=9, n=9

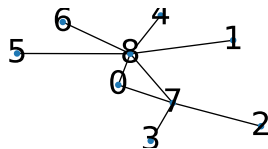

e=10, n=9

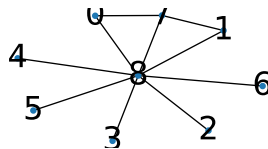

Supplement: supplementary_material [file attachment]

epoch\_1199\_0.8\_init.pdf

$$e=12, n=9$$
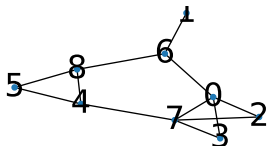
$$e=14, n=9$$
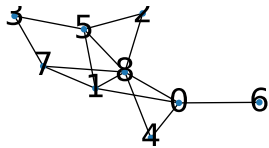

$e=16, n=9$

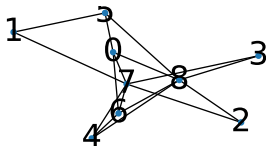
$$e=18, n=9$$
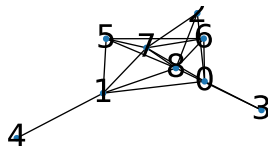
$$e=13, n=9$$
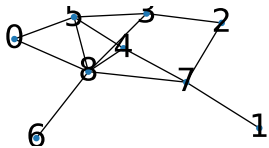

$e=11, n=8$

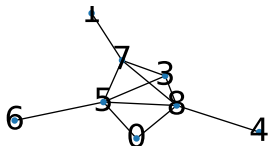
$$e=10, n=9$$
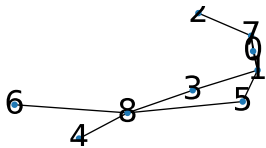
$$e=13, n=9$$
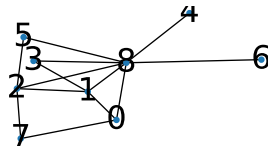
$$e=10, n=9$$
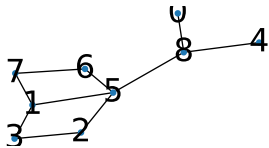
$$e=14, n=9$$
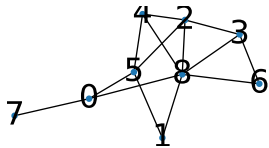
$$e=15, n=9$$
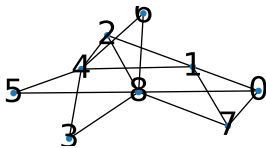

$e=17, n=9$

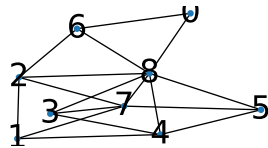
$$e=14, n=9$$
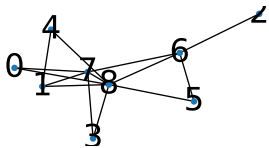
$$e=11, n=8$$
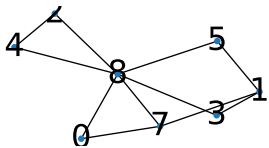

$e=15, n=9$

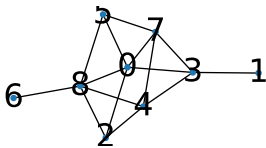
$$e=14, n=9$$
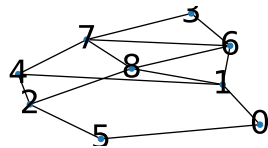

Supplement: supplementary_material [file attachment]

epoch\_2999\_0.8.pdf

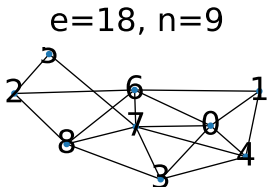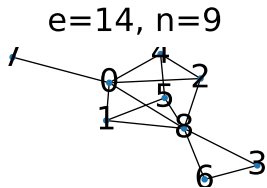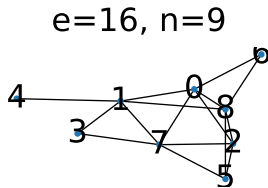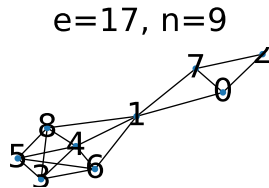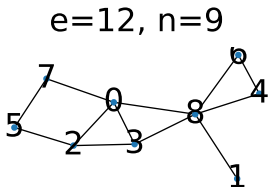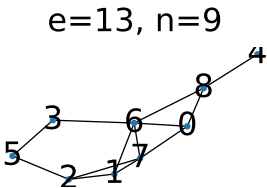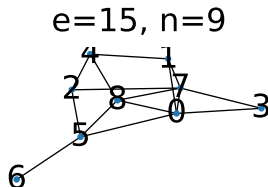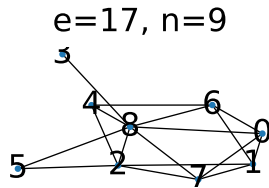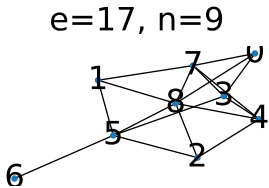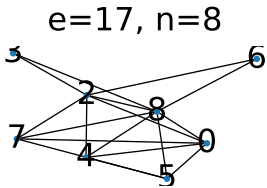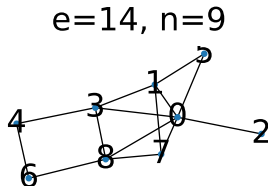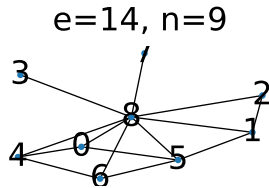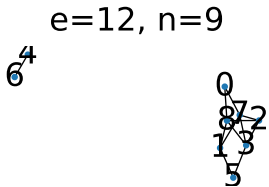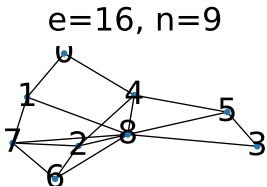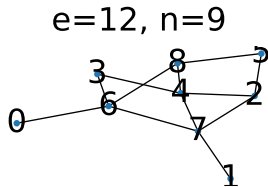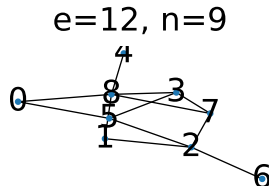

Supplement: supplementary_material [file attachment]

epoch 2399 1.6.pdf

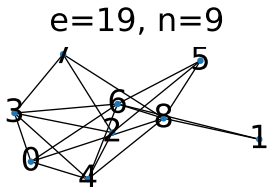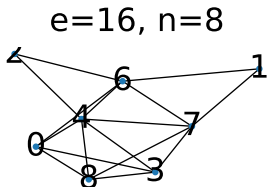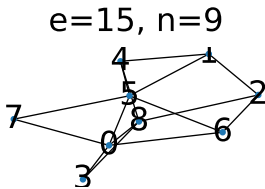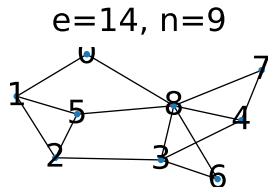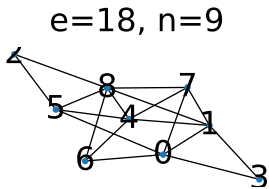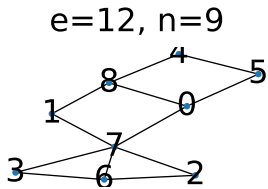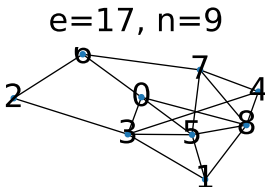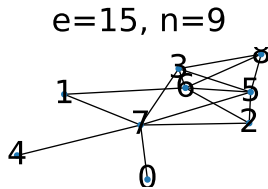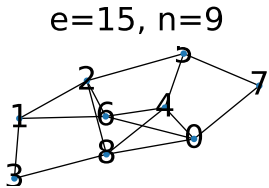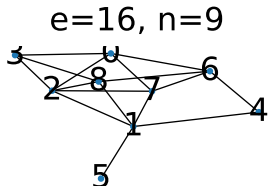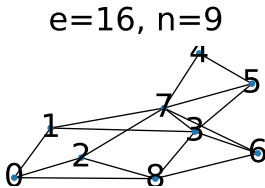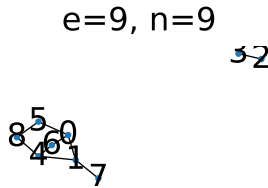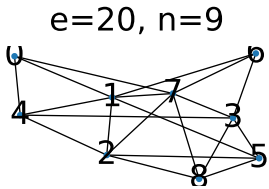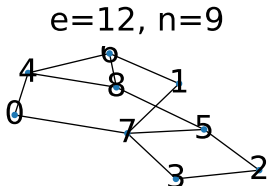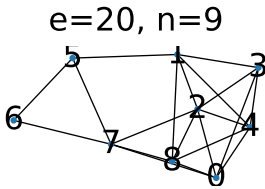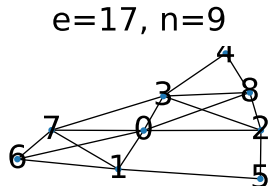

Supplement: supplementary_material [file attachment]

# epoch\_399\_0.2.pdf

e=10, n=9

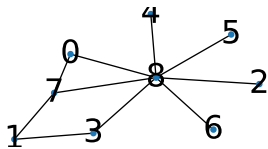

e=11, n=9

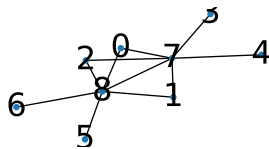

e=13, n=9

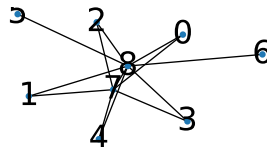

e=9, n=9

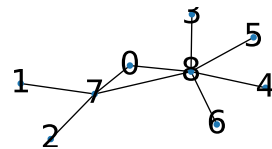

e=9, n=9

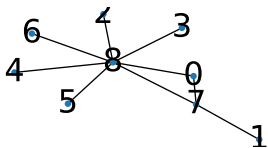

e=8, n=9

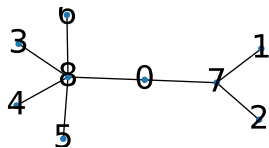

e=10, n=9

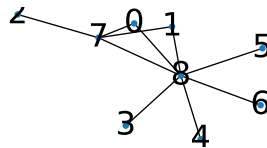

e=11, n=9

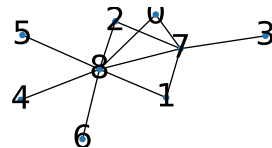

e=10, n=9

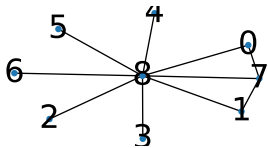

e=8, n=9

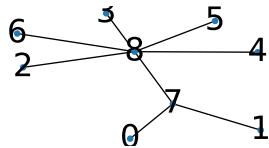

e=12, n=9

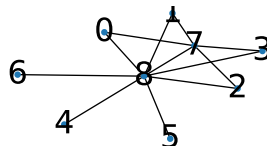

e=8, n=9

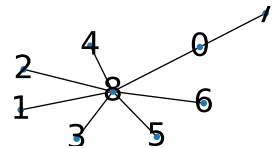

e=10, n=9

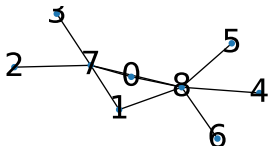

e=8, n=9

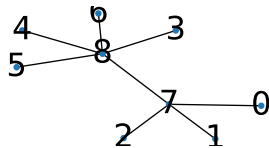

e=7, n=8

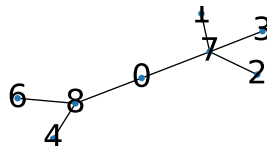

e=10, n=9

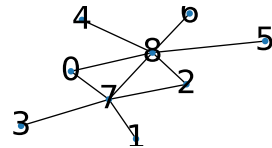

Supplement: supplementary_material [file attachment]

# epoch\_4799\_0.6.pdf

e=9, n=8

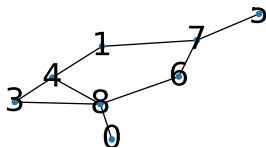

e=11, n=9

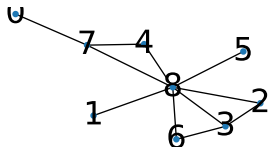

e=11, n=9

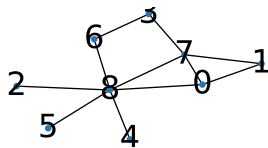

e=13, n=9

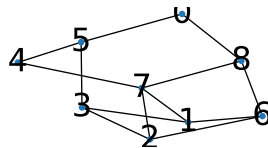

e=17, n=9

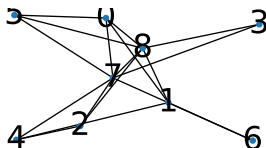

e=13, n=9

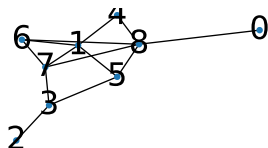

e=14, n=9

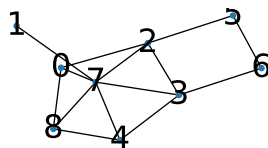

e=12, n=8

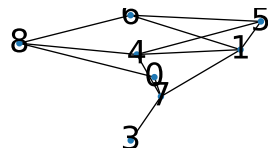

e=14, n=9

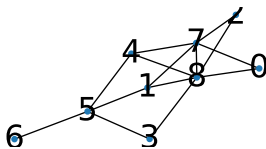

e=15, n=9

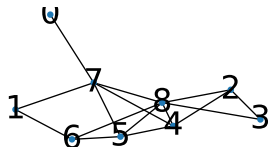

e=11, n=9

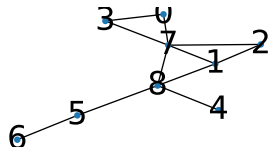

e=12, n=9

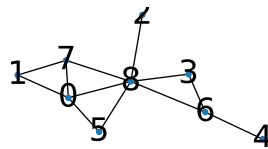

e=12, n=9

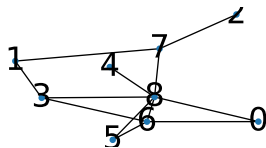

e=10, n=8

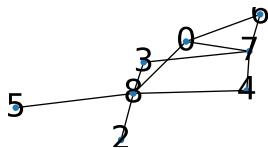

e=10, n=9

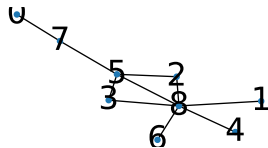

e=13, n=9

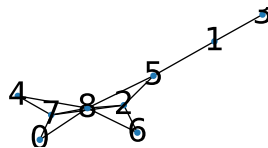

Supplement: supplementary_material [file attachment]

# epoch\_199\_0.4\_init.pdf

e=12, n=8

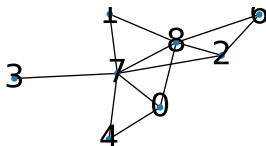

e=12, n=8

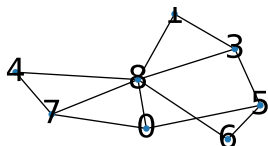

e=13, n=9

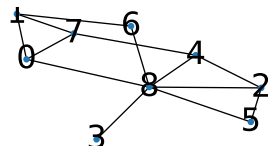

e=15, n=9

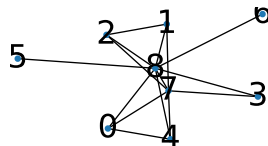

e=13, n=9

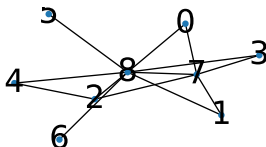

e=11, n=9

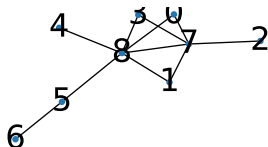

e=9, n=8

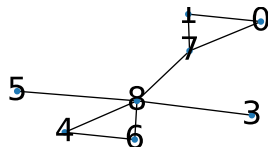

e=11, n=8

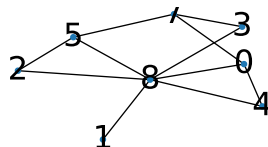

e=9, n=8

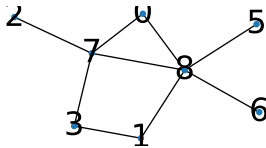

e=12, n=9

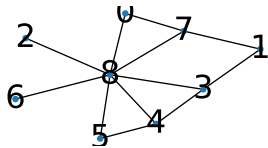

e=11, n=8

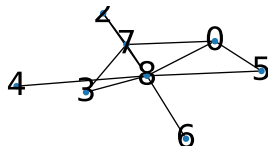

e=11, n=9

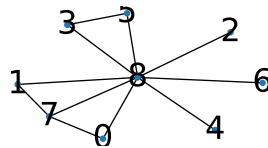

e=11, n=9

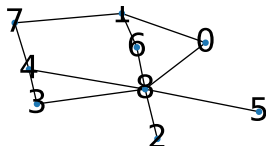

e=10, n=9

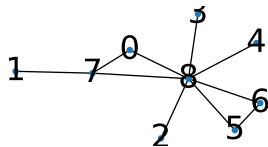

e=9, n=9

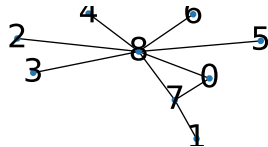

e=12, n=9

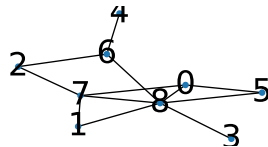

Supplement: supplementary_material [file attachment]

# epoch\_3999\_1.6\_init.pdf

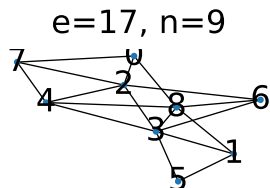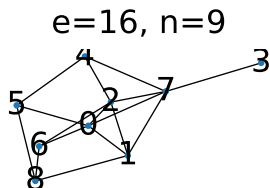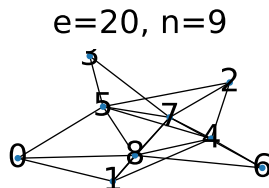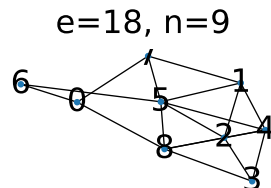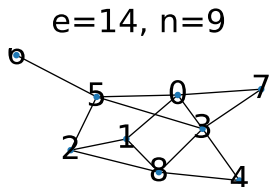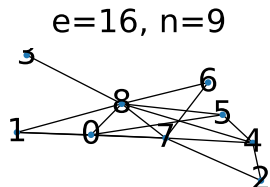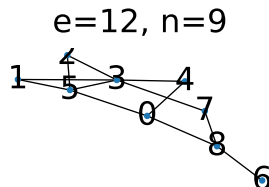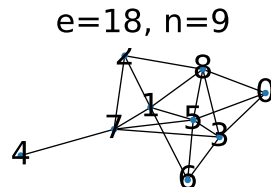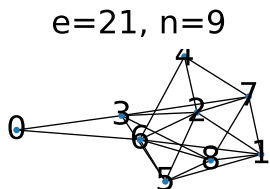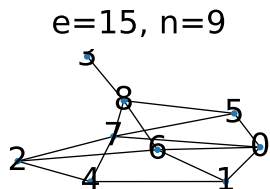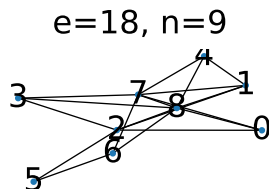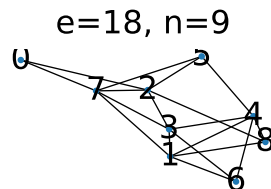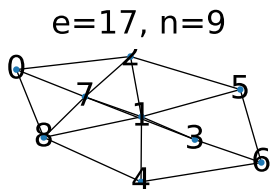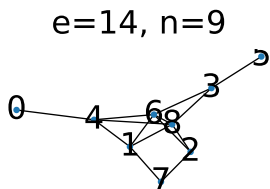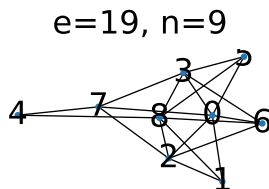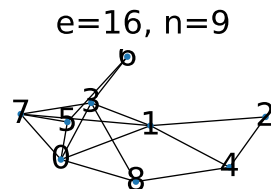

Supplement: supplementary_material [file attachment]

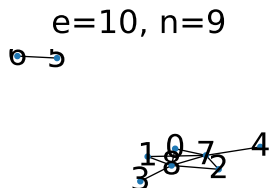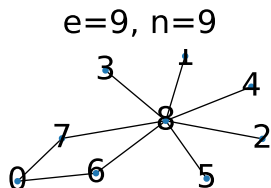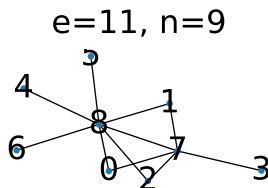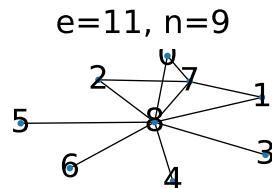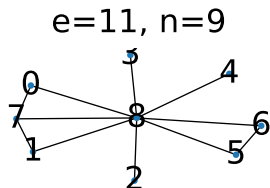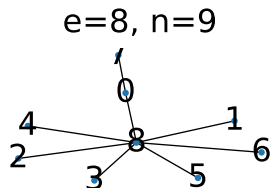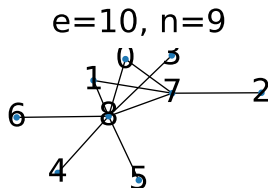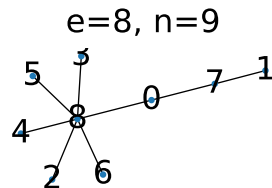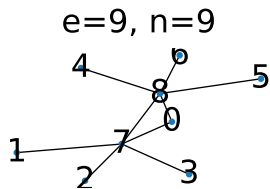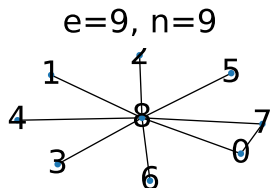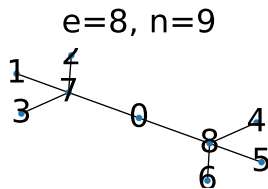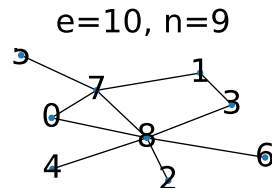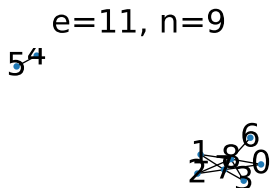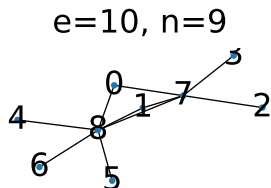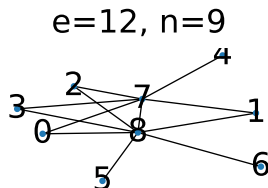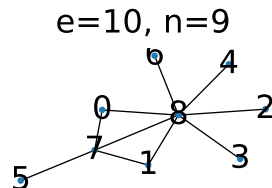

Supplement: supplementary_material [file attachment]

# epoch\_1199\_0.6\_init.pdf

e=12, n=9

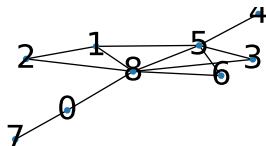

e=12, n=9

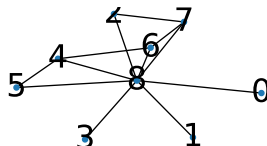

e=8, n=7

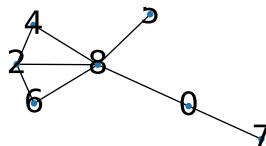

e=11, n=8

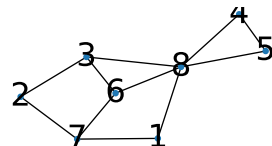

e=14, n=9

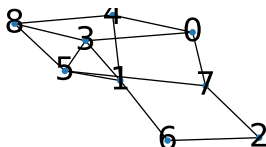

e=9, n=8

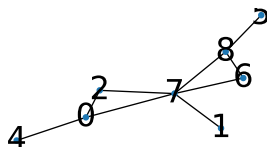

e=10, n=7

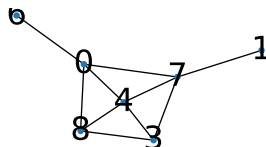

e=15, n=9

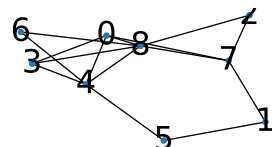

e=14, n=9

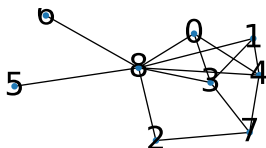

e=15, n=9

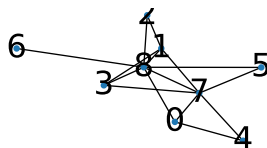

e=12, n=9

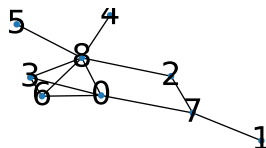

e=10, n=8

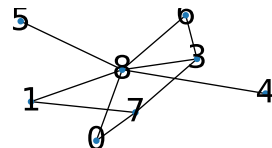

e=12, n=9

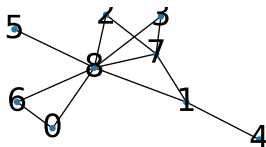

e=14, n=9

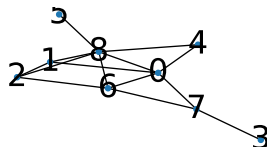

e=14, n=9

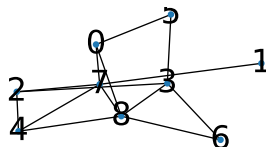

e=13, n=9

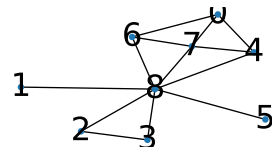

Supplement: supplementary_material [file attachment]

# epoch\_2799\_0.1\_init.pdf

e=9, n=9

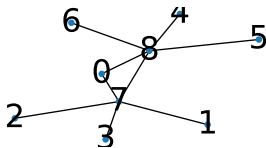

e=9, n=9

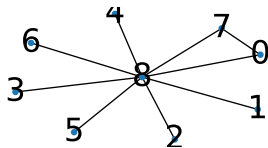

e=10, n=9

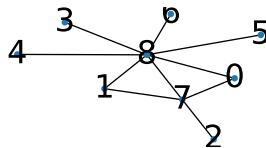

e=9, n=9

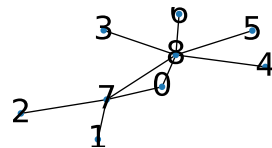

e=8, n=9

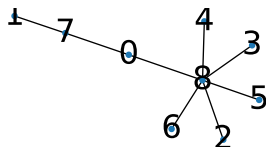

e=10, n=9

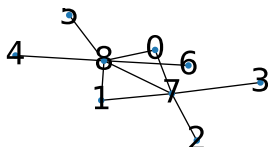

e=8, n=9

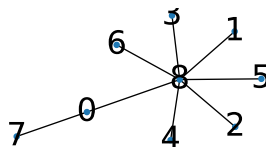

e=9, n=9

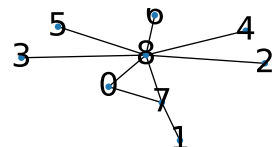

e=12, n=9

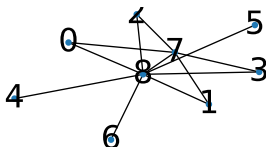

e=11, n=9

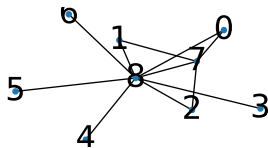

e=11, n=9

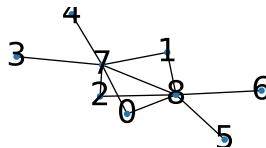

e=8, n=9

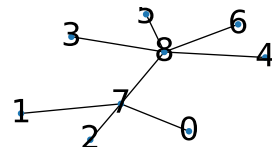

e=8, n=9

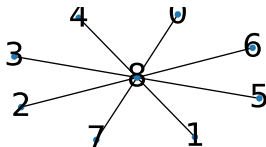

e=10, n=9

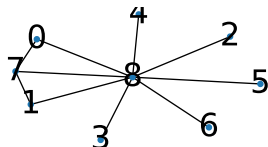

e=8, n=9

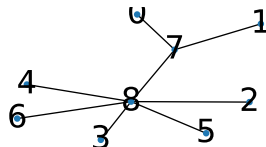

e=8, n=9

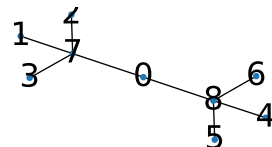

Supplement: supplementary_material [file attachment]

epoch 2999 0.8.pdf

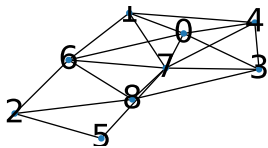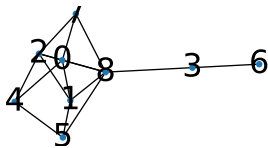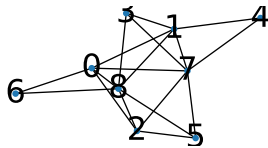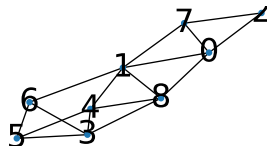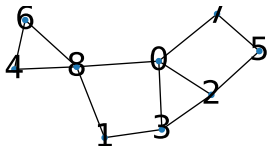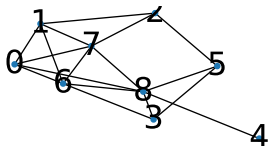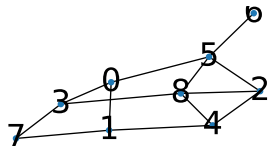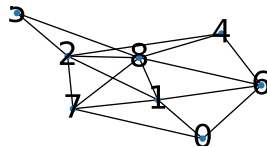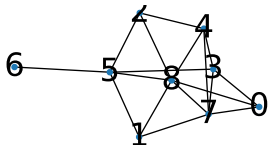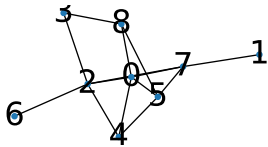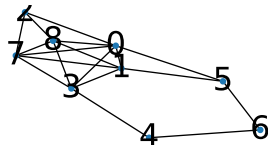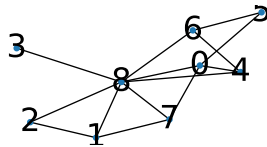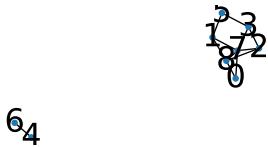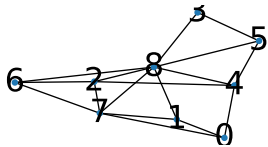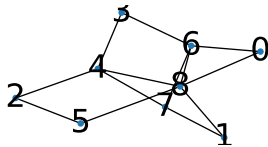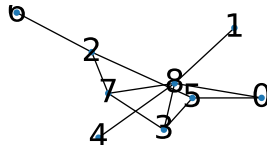

Supplement: supplementary_material [file attachment]

# epoch\_4999\_0.8\_init.pdf

e=14, n=9

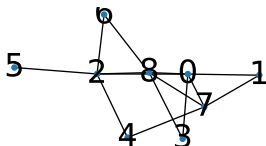

e=12, n=9

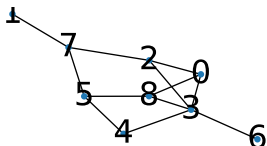

e=17, n=9

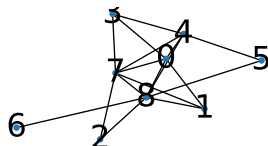

e=15, n=9

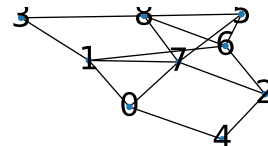

e=16, n=9

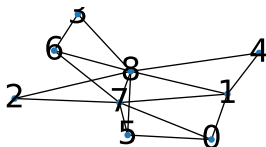

e=15, n=8

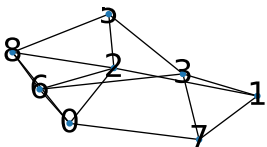

e=12, n=9

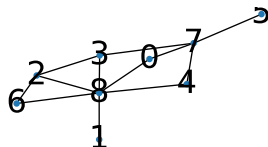

e=13, n=9

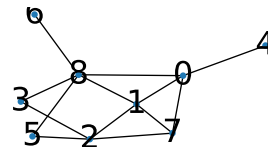

e=8, n=8

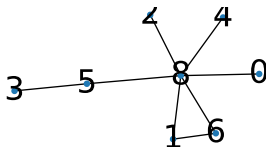

e=16, n=9

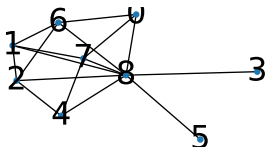

e=16, n=9

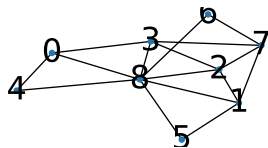

e=13, n=8

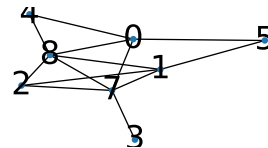

e=11, n=8

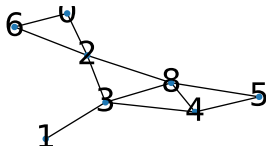

e=14, n=9

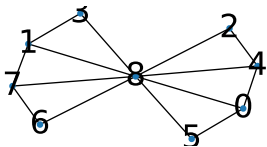

e=12, n=9

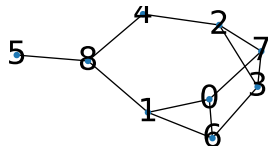

e=17, n=9

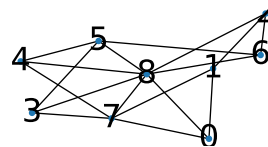

Supplement: supplementary_material [file attachment]

# epoch\_4999\_0.8.pdf

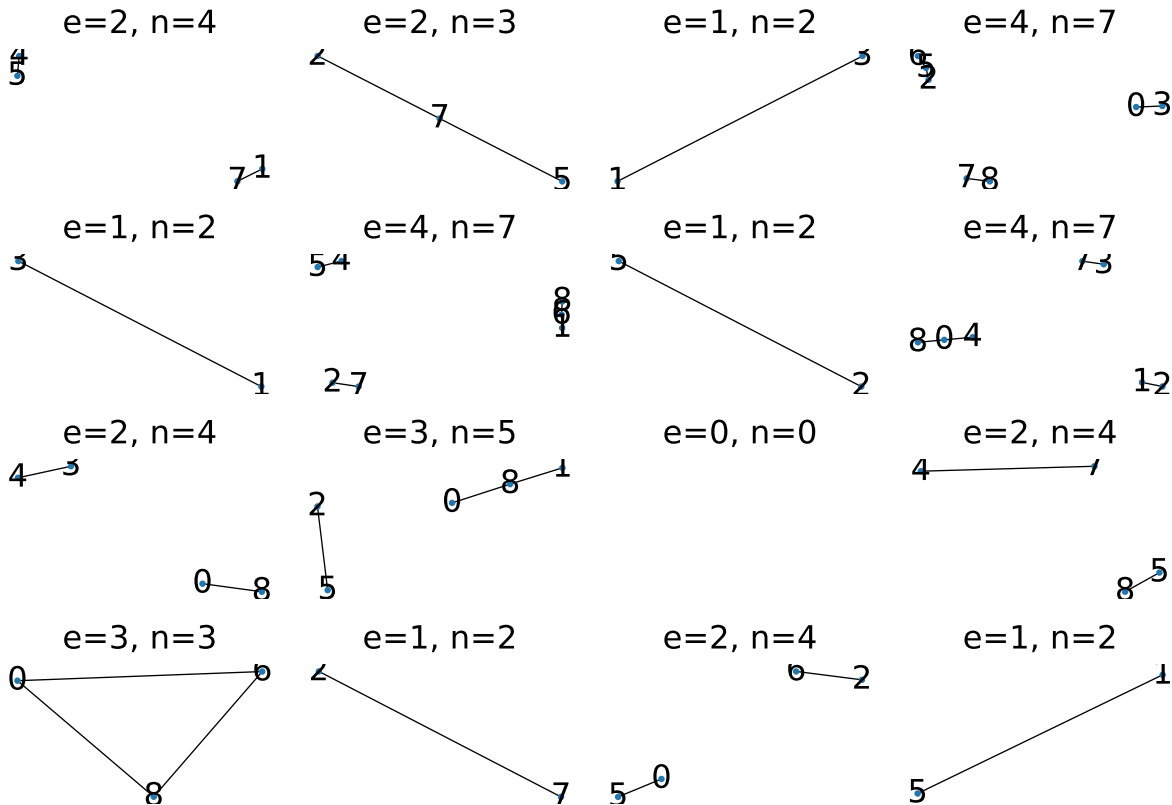

Supplement: supplementary_material [file attachment]

epoch\_1199\_1.6\_init.pdf

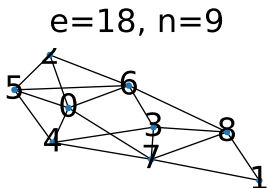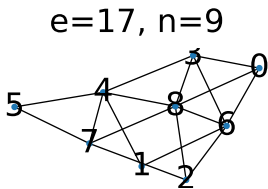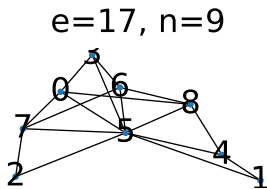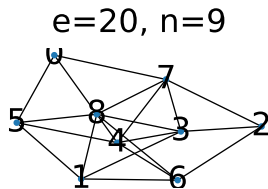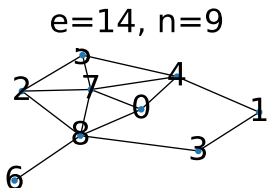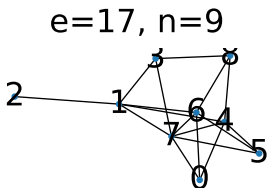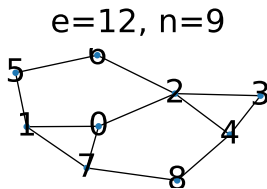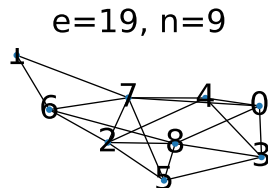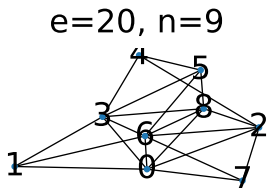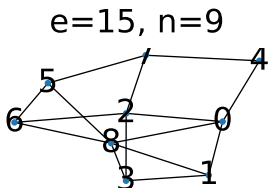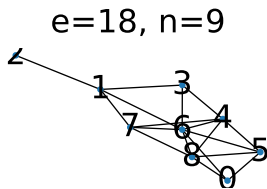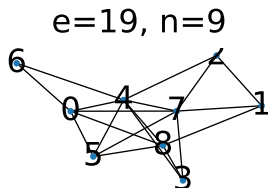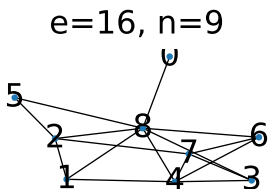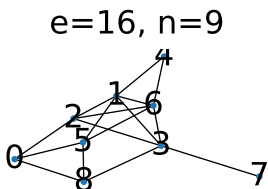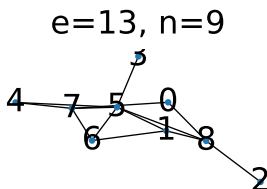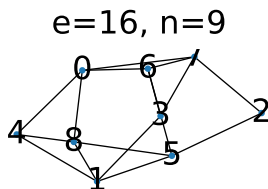

Supplement: supplementary_material [file attachment]

# epoch\_599\_0.4\_init.pdf

e=10, n=8

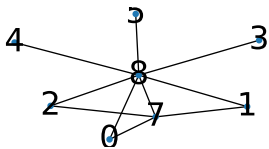

e=11, n=9

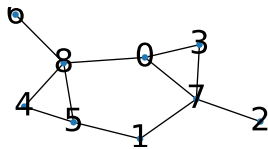

e=11, n=9

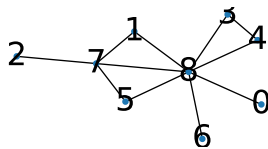

e=12, n=9

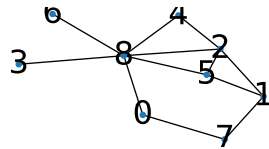

e=9, n=9

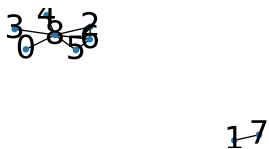

e=16, n=9

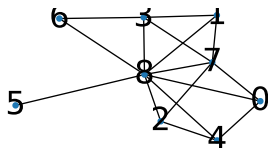

e=12, n=9

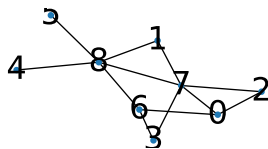

e=9, n=9

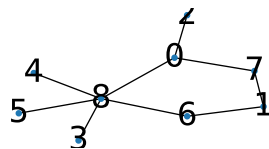

e=15, n=9

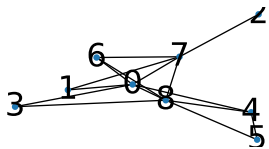

e=11, n=9

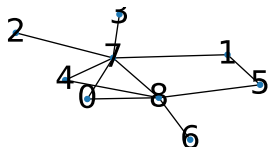

e=13, n=9

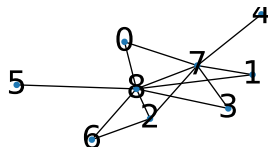

e=13, n=9

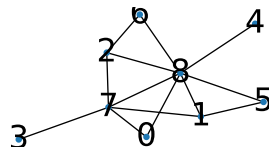

e=10, n=9

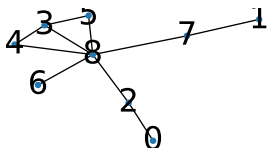

e=12, n=9

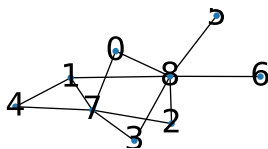

e=11, n=9

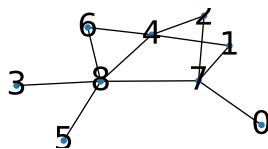

e=8, n=7

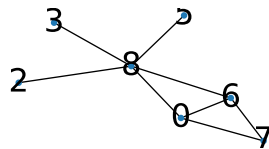

Supplement: supplementary_material [file attachment]

# epoch\_199\_0.4.pdf

e=14, n=9

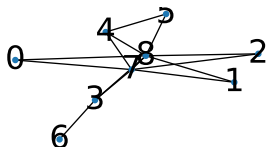

e=10, n=8

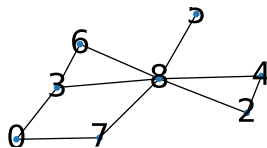

e=11, n=9

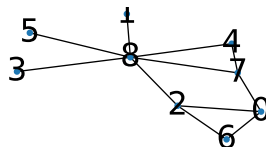

e=13, n=8

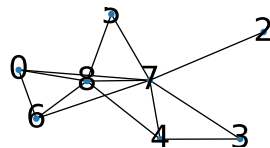

e=12, n=9

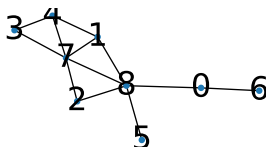

e=6, n=9

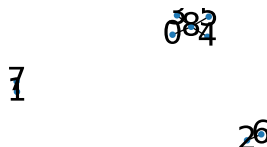

e=12, n=9

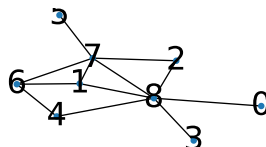

e=6, n=7

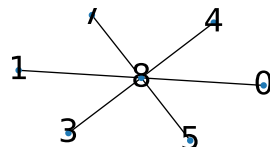

e=11, n=8

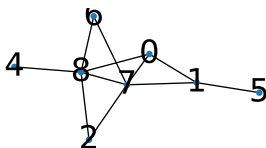

e=7, n=8

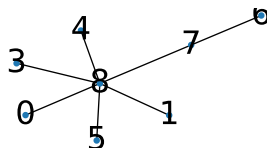

e=11, n=9

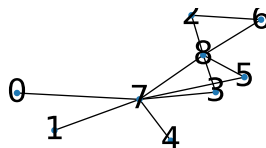

e=9, n=9

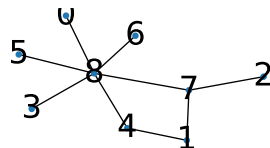

e=7, n=9

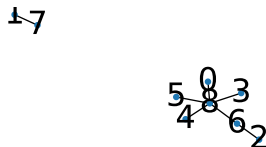

e=8, n=9

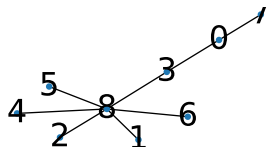

e=7, n=8

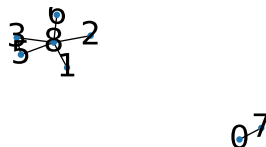

e=7, n=7

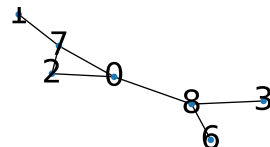

Supplement: supplementary_material [file attachment]

# epoch\_599\_0.4\_init.pdf

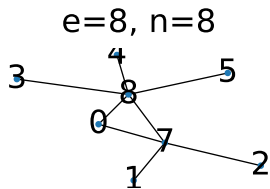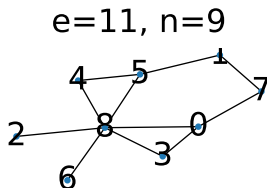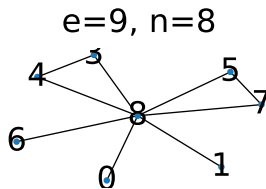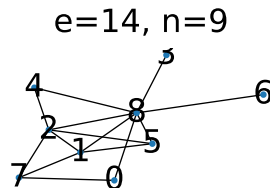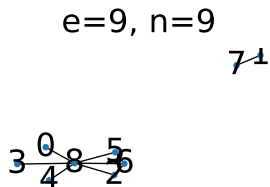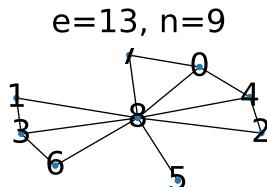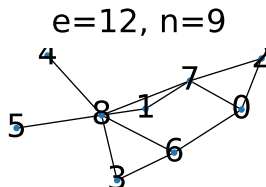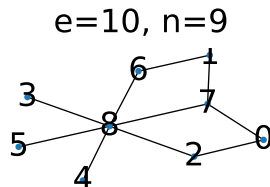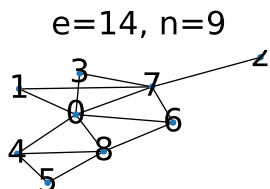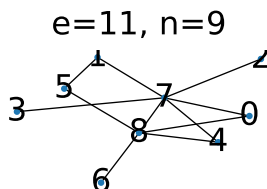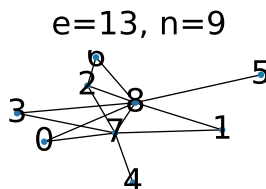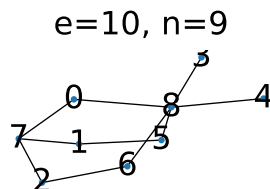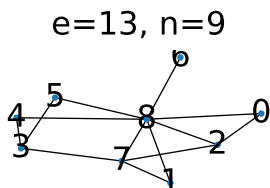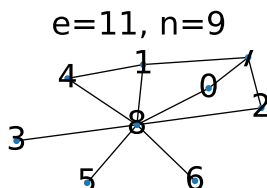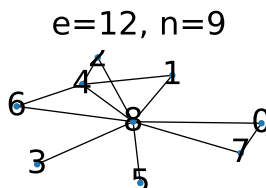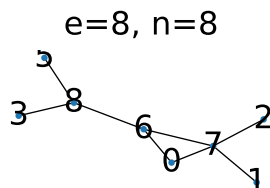

Supplement: supplementary_material [file attachment]

# epoch\_1999\_0.8.pdf

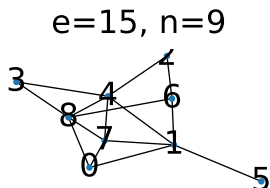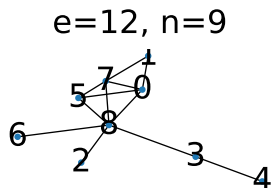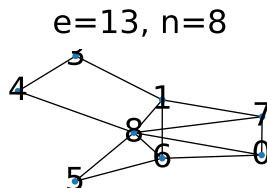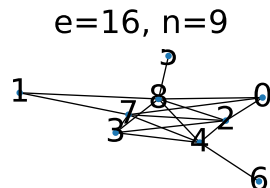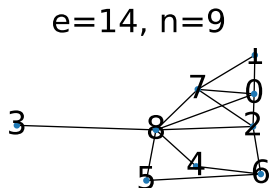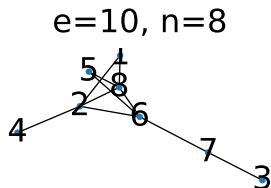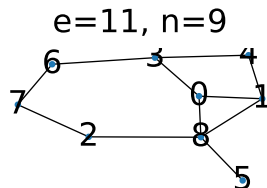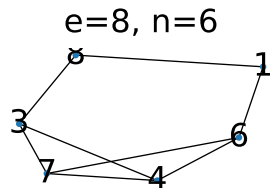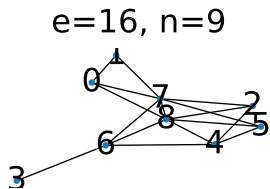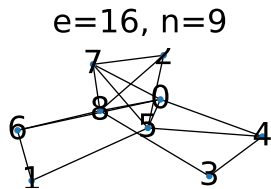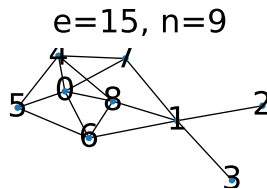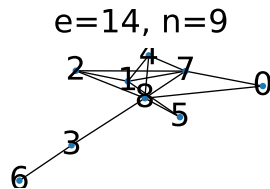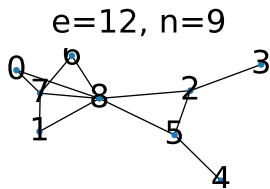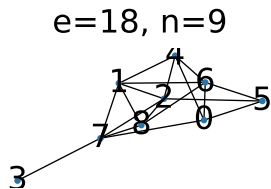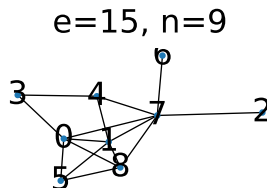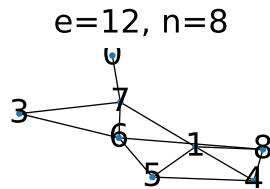

Supplement: supplementary_material [file attachment]

# epoch\_4199\_0.8\_init.pdf

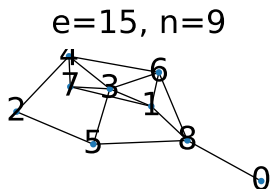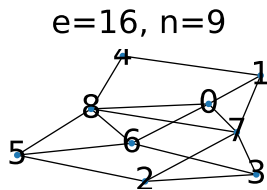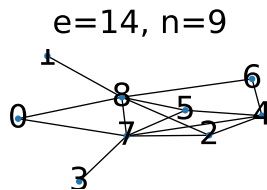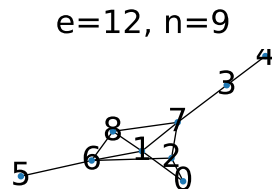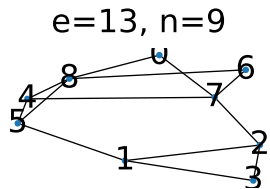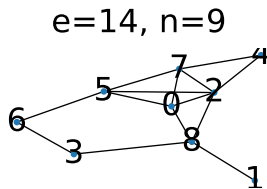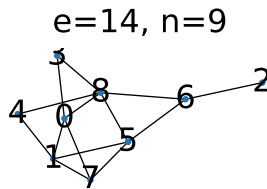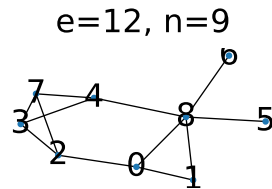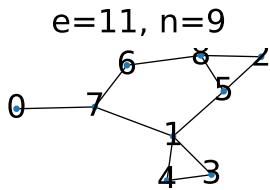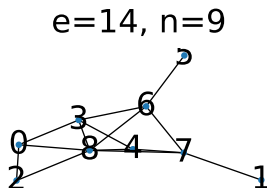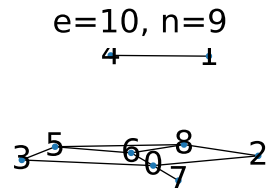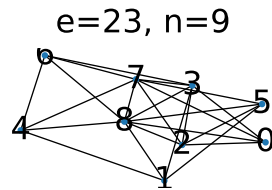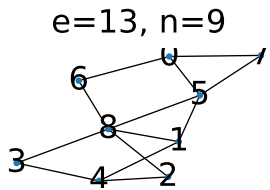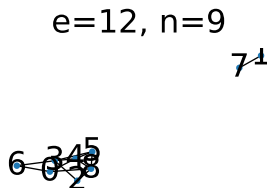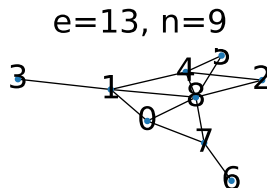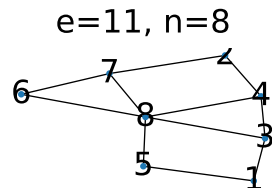

Supplement: supplementary_material [file attachment]

# epoch\_199\_0.8.pdf

e=16, n=9

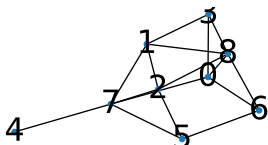

e=13, n=9

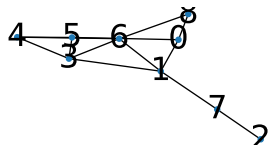

e=18, n=9

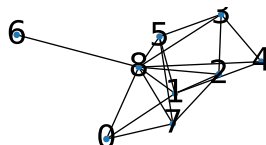

e=16, n=9

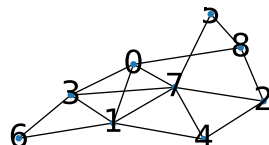

e=16, n=9

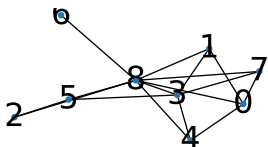

e=12, n=9

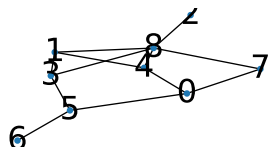

e=15, n=9

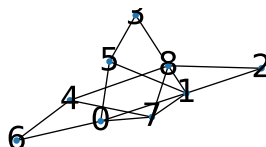

e=12, n=9

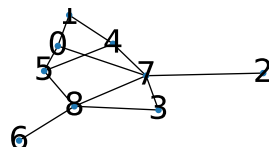

e=12, n=9

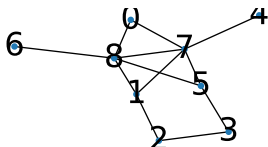

e=14, n=9

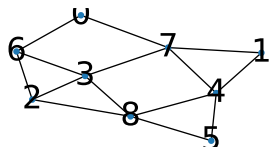

e=14, n=9

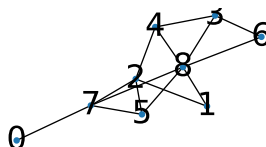

e=12, n=9

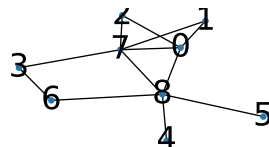

e=8, n=9

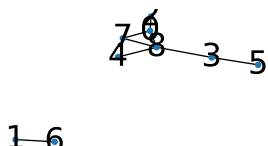

e=16, n=8

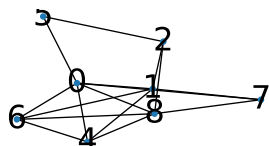

e=11, n=9

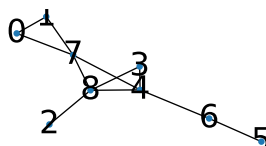

e=11, n=9

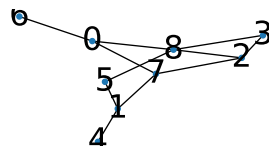

Supplement: supplementary_material [file attachment]

# epoch\_199\_0.4\_init.pdf

e=12, n=8

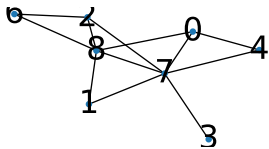

e=11, n=8

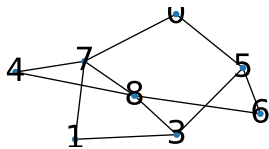

e=14, n=9

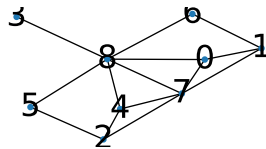

e=13, n=9

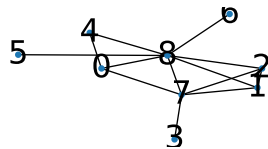

e=11, n=9

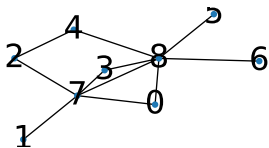

e=8, n=8

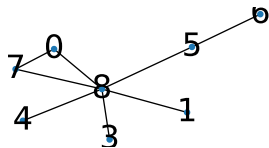

e=10, n=9

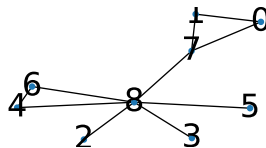

e=14, n=8

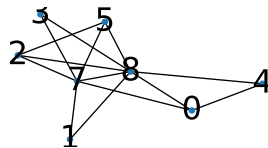

e=11, n=9

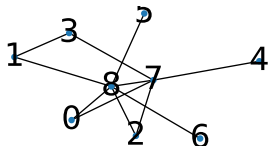

e=13, n=9

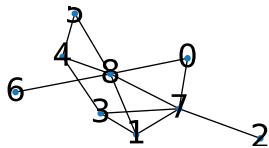

e=11, n=9

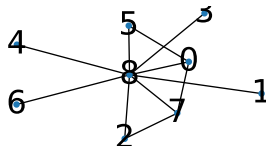

e=8, n=8

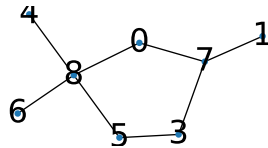

e=12, n=9

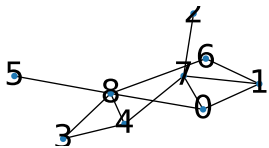

e=10, n=9

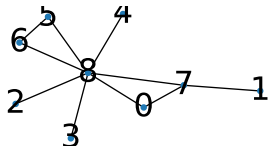

e=9, n=9

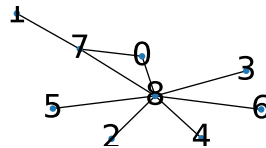

e=13, n=9

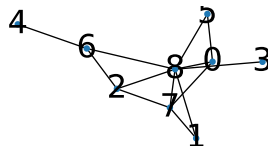

Supplement: supplementary_material [file attachment]

$e=65, n=20$

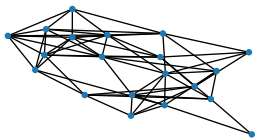

$e=70, n=20$

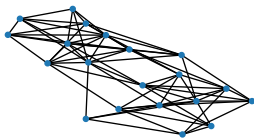

e=66, n=20

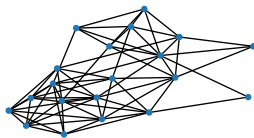

$e=70, n=20$

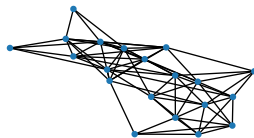

$e=60, n=20$

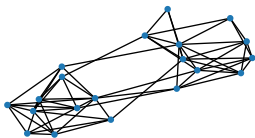

e=73, n=20

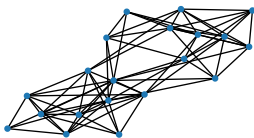

e=67, n=20

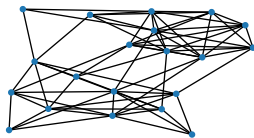

e=67, n=20

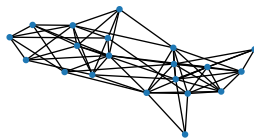

$e=68, n=20$

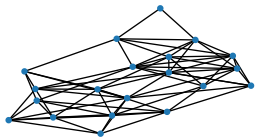

$e=67, n=20$

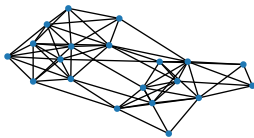

$e=70, n=20$

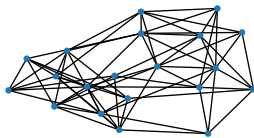

e=66, n=20

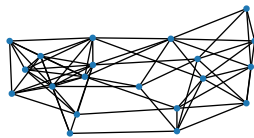

$e=68, n=20$

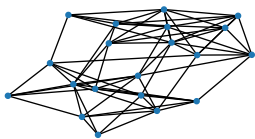

$e=68, n=20$

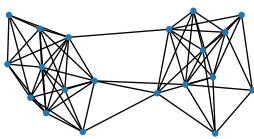

e=69, n=20

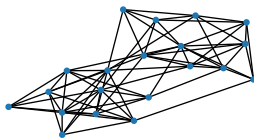

e=63, n=20

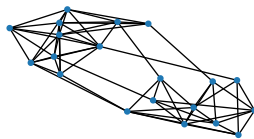

Supplement: supplementary_material [file attachment]

# epoch\_2799\_0.1.pdf

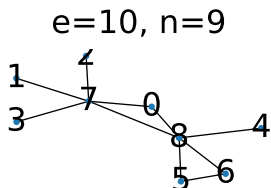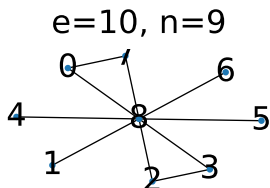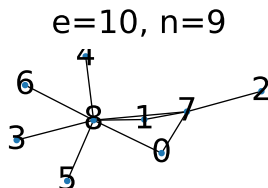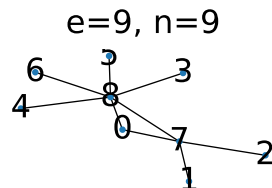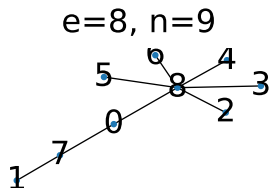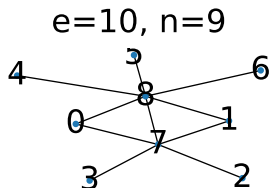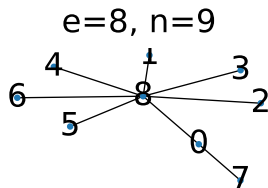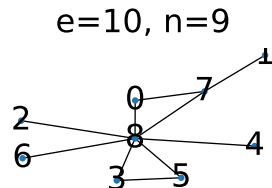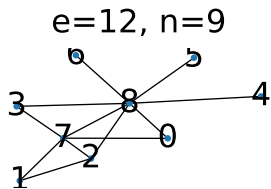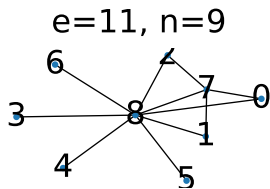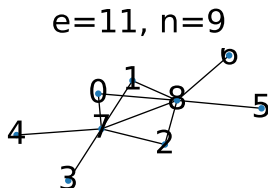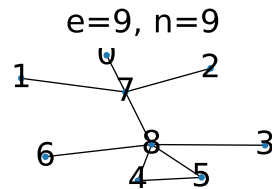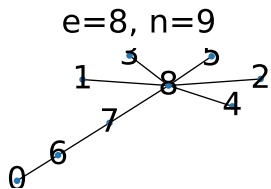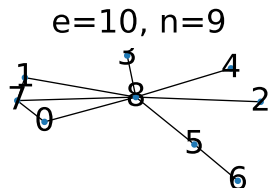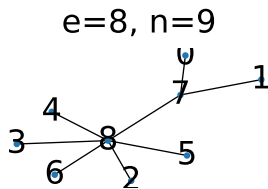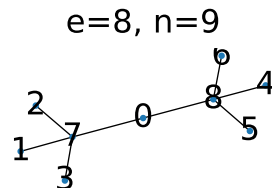

Supplement: supplementary_material [file attachment]

epoch\_2999\_0.8\_init.pdf

e=73, n=20

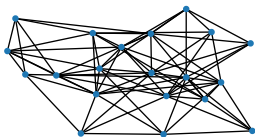

e=88, n=20

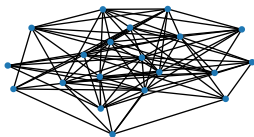

e=86, n=20

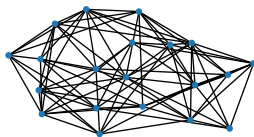

e=79, n=20

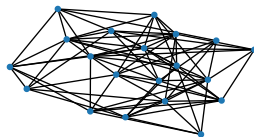

e=74, n=20

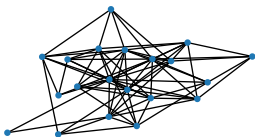

e=87, n=20

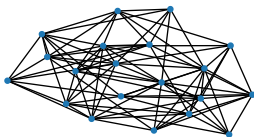

e=72, n=20

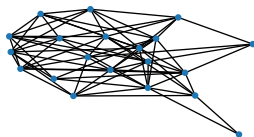

e=79, n=20

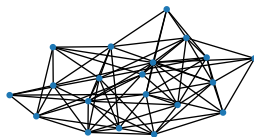

e=80, n=20

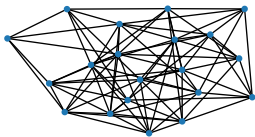

e=79, n=20

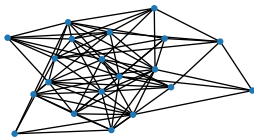

e=83, n=20

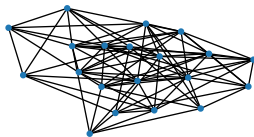

e=69, n=20

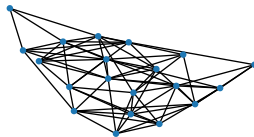

e=79, n=20

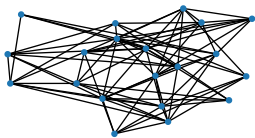

e=73, n=20

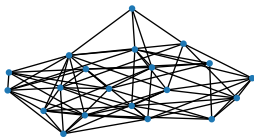

e=73, n=20

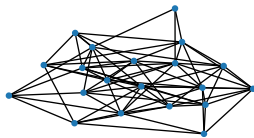

e=74, n=20

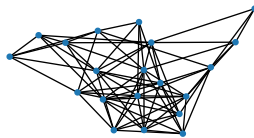

Supplement: supplementary_material [file attachment]

epoch 4799 1.6 init.pdf

e=93, n=20

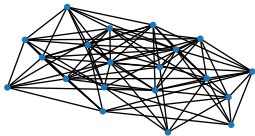

$e=75, n=20$

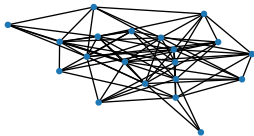

e=94, n=20

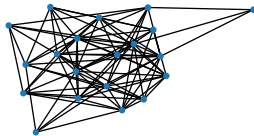

e=93, n=20

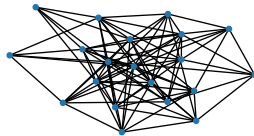

$e=97, n=20$

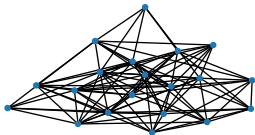

e=86, n=20

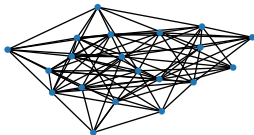

$e=83, n=20$

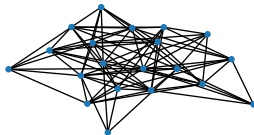

$e=76, n=20$

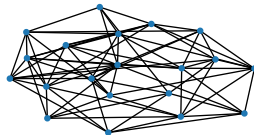

$e=81, n=20$

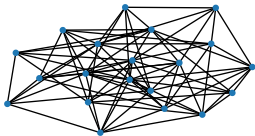

$e=80, n=20$

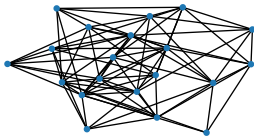

e=94, n=20

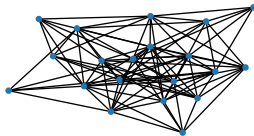

$e=86, n=20$

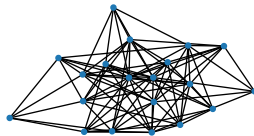

$e=90, n=20$

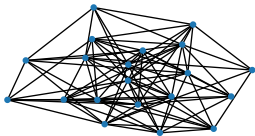

$e=87, n=20$

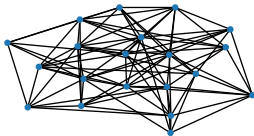

e=87, n=20

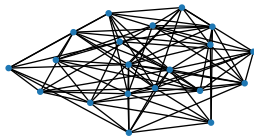

$e=90, n=20$

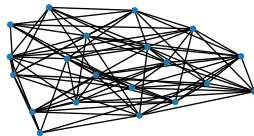

Supplement: supplementary_material [file attachment]

epoch\_2499\_0.2.pdf

e=60, n=20

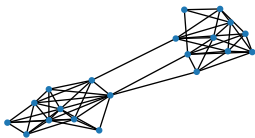

$e=62, n=20$

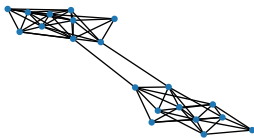

e=59, n=20

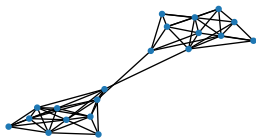

e=59, n=20

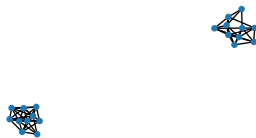

e=59, n=20

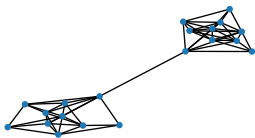

e=64, n=20

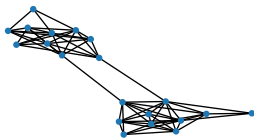

e=61, n=20

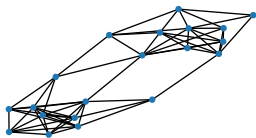

e=62, n=20

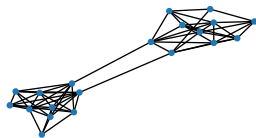

e=59, n=20

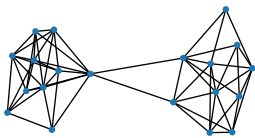

$e=60, n=20$

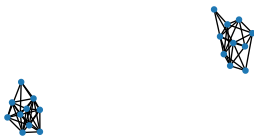

$e=60, n=20$

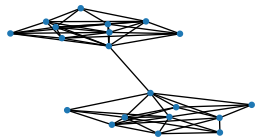

e=62, n=20

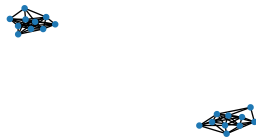

e=59, n=20

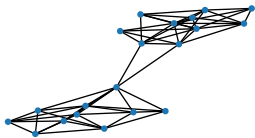

e=63, n=20

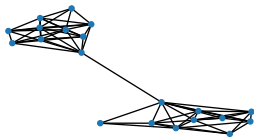

e=63, n=20

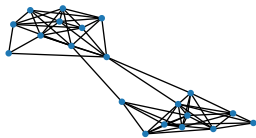

e=61, n=20

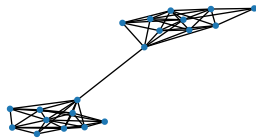

Supplement: supplementary_material [file attachment]

epoch 2499 1.6 init.pdf

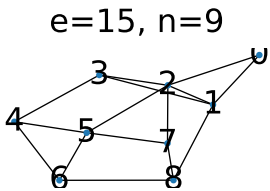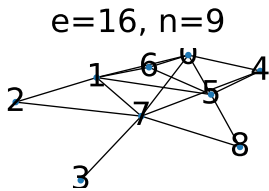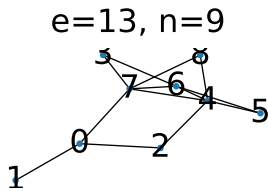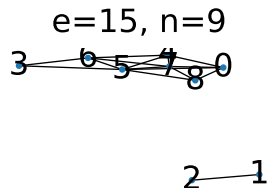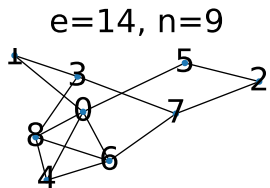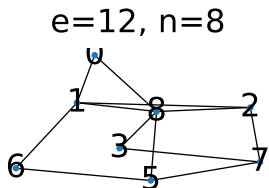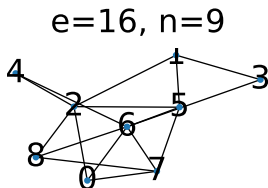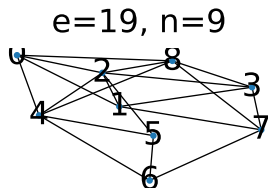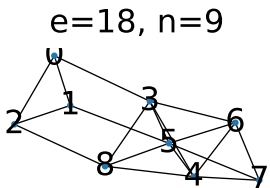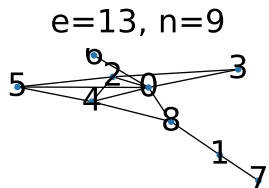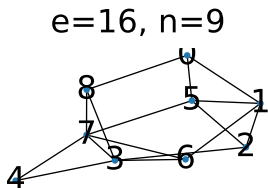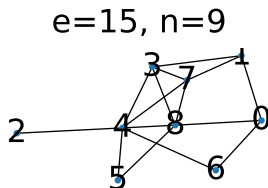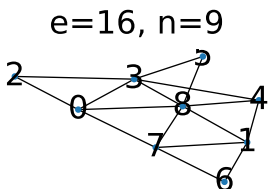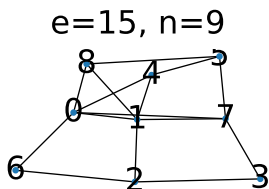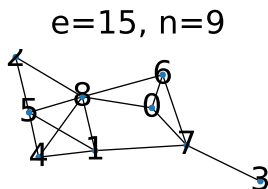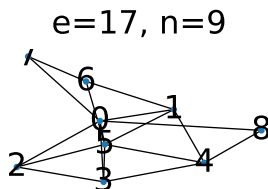

Supplement: supplementary_material [file attachment]

# epoch\_2799\_0.4.pdf

e=11, n=8

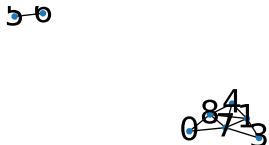

e=16, n=9

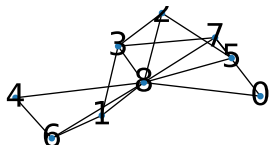

e=9, n=8

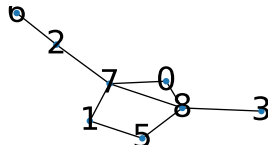

e=11, n=9

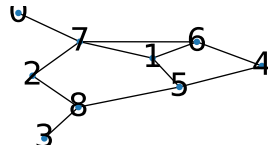

e=11, n=9

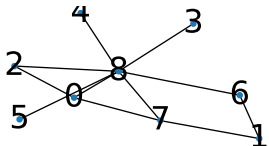

e=11, n=9

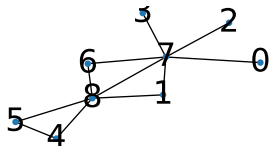

e=11, n=9

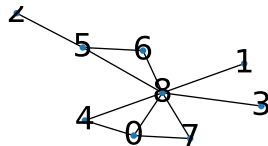

e=7, n=8

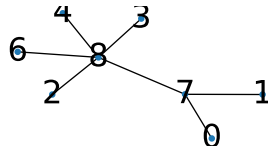

e=12, n=9

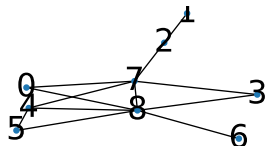

e=12, n=9

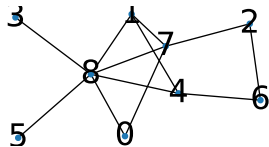

e=15, n=9

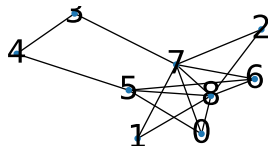

e=13, n=9

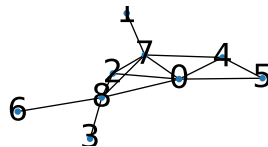

e=11, n=8

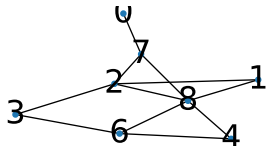

e=9, n=9

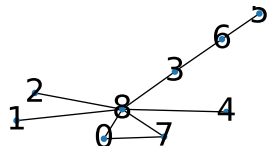

e=10, n=9

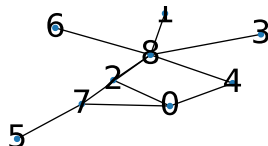

e=10, n=8

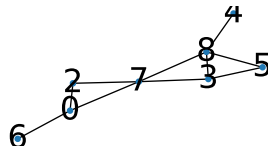

Supplement: supplementary_material [file attachment]

epoch 2499 0.4 init.pdf

$e=67, n=20$

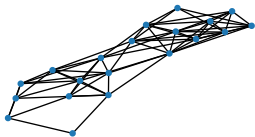

$e=73, n=20$

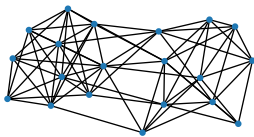

e=63, n=20

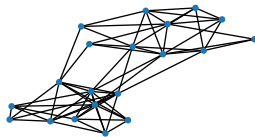

e=73, n=20

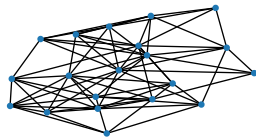

$e=69, n=20$

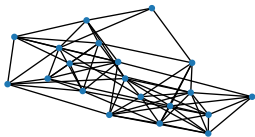

e=66, n=20

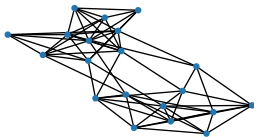

e=64, n=20

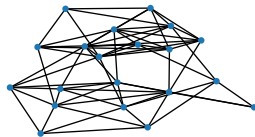

e=68, n=20

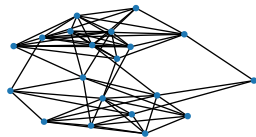

$e=67, n=20$

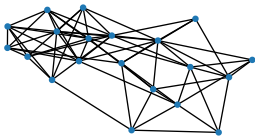

e=68, n=20

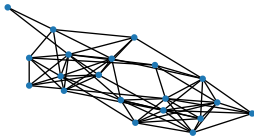

e=64, n=20

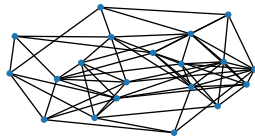

e=74, n=20

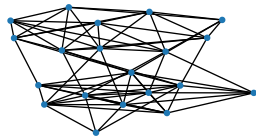

e=62, n=20

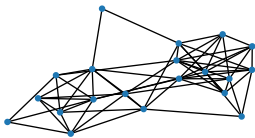

e=74, n=20

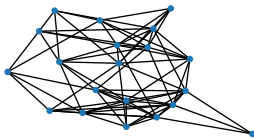

$e=60, n=20$

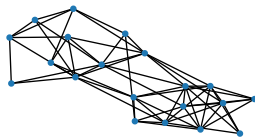

e=63, n=20

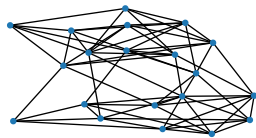

Supplement: supplementary_material [file attachment]

epoch\_2999\_0.1\_init.pdf

$e=60, n=20$

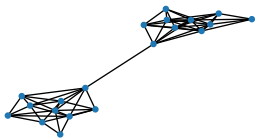

$e=60, n=20$

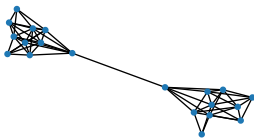

$e=60, n=20$

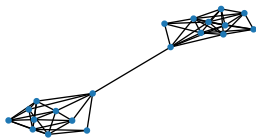

e=60, n=20

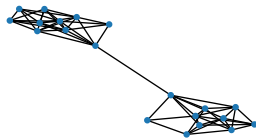

$e=60, n=20$

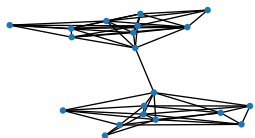
$$e=60, n=20$$
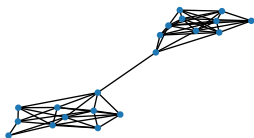

$e=60, n=20$

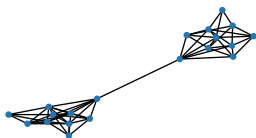

e=60, n=20

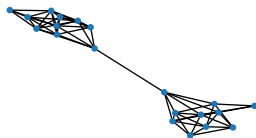

$e=60, n=20$

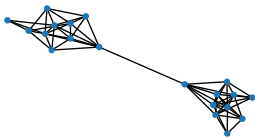

$e=61, n=20$

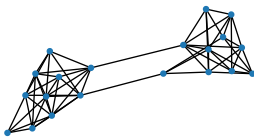

e=62, n=20

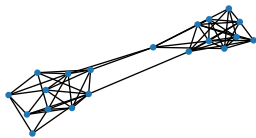

e=61, n=20

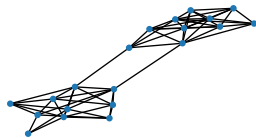

$e=60, n=20$

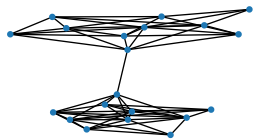
$$e=60, n=20$$
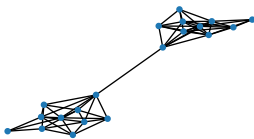

$e=60, n=20$

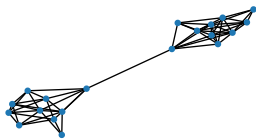

e=62, n=20

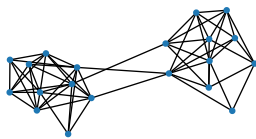

Supplement: supplementary_material [file attachment]

epoch\_1399\_0.6\_init.pdf

e=69, n=20

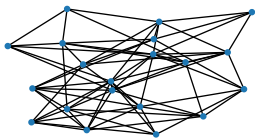

e=73, n=20

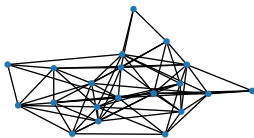

e=67, n=20

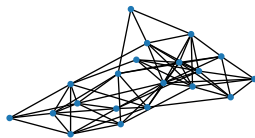

e=66, n=20

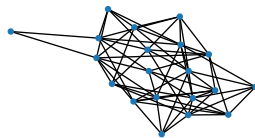

e=75, n=20

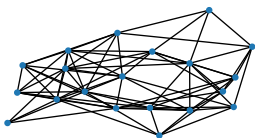

e=81, n=20

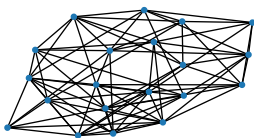

e=75, n=20

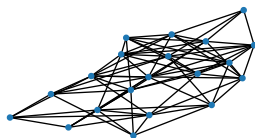

e=68, n=20

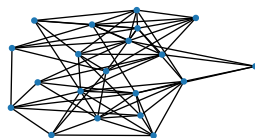

e=80, n=20

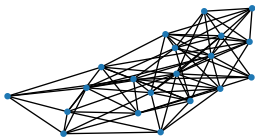

e=77, n=20

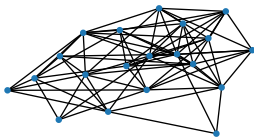

e=72, n=20

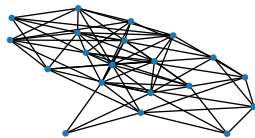

e=75, n=20

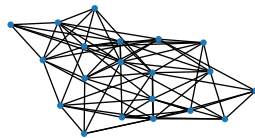

e=74, n=20

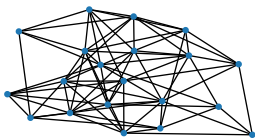

e=70, n=20

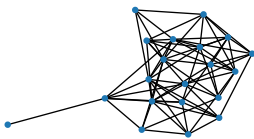

e=73, n=20

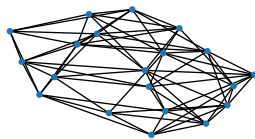

e=72, n=20

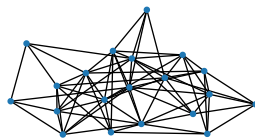

Supplement: supplementary_material [file attachment]

# epoch\_4999\_0.6\_init.pdf

e=13, n=9

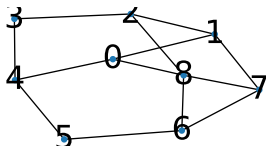

e=11, n=8

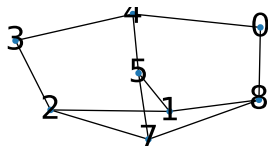

e=12, n=9

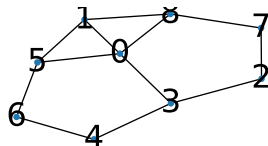

e=14, n=9

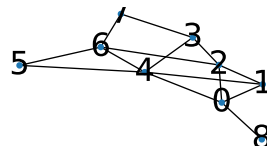

e=16, n=9

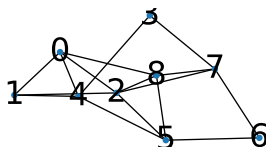

e=11, n=9

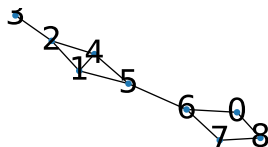

e=12, n=7

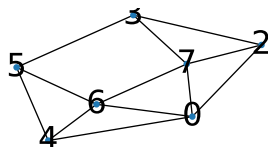

e=12, n=9

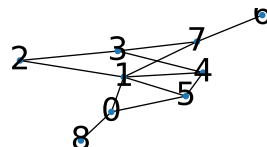

e=11, n=9

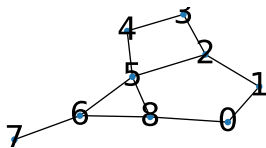

e=13, n=9

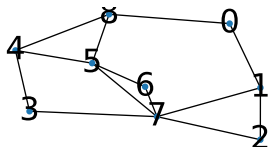

e=11, n=9

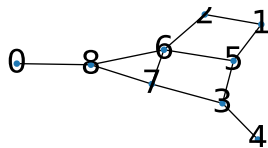

e=19, n=9

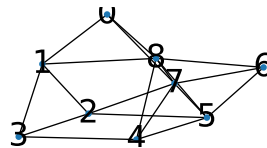

e=10, n=9

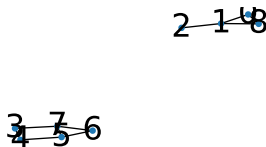

e=18, n=9

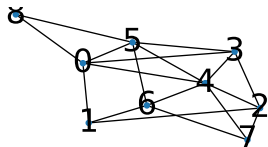

e=13, n=9

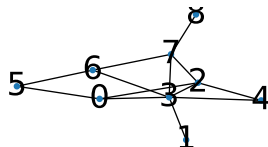

e=15, n=9

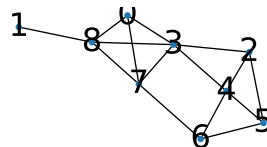

Supplement: supplementary_material [file attachment]

epoch\_1799\_0.1\_init.pdf

e=61, n=20

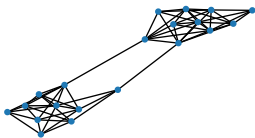

$e=60, n=20$

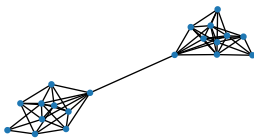

e=60, n=20

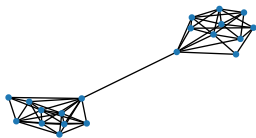

e=62, n=20

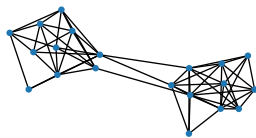

$e=60, n=20$

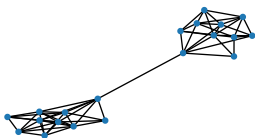

$e=60, n=20$

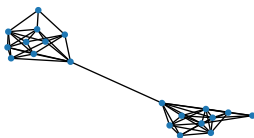

e=60, n=20

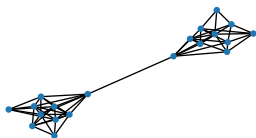

e=60, n=20

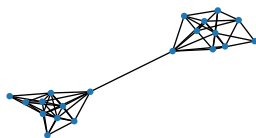

e=62, n=20

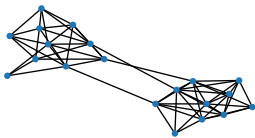

$e=60, n=20$

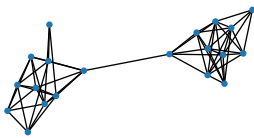

e=61, n=20

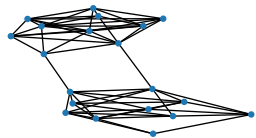

e=60, n=20

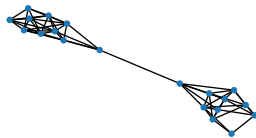

$e=60, n=20$

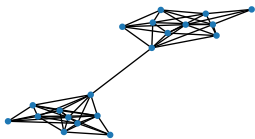

$e=60, n=20$

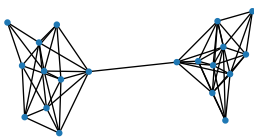

$e=60, n=20$

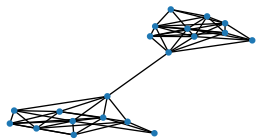

e=60, n=20

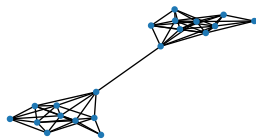

Supplement: supplementary_material [file attachment]

e=76, n=20

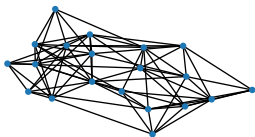

e=74, n=20

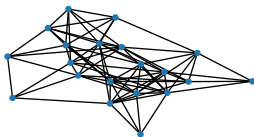

e=75, n=20

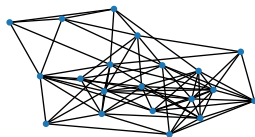

e=71, n=20

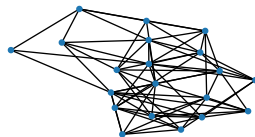

e=69, n=20

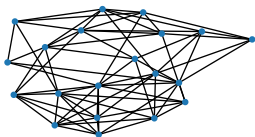

e=74, n=20

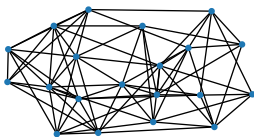

e=66, n=20

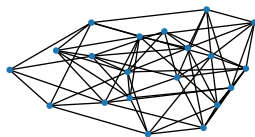

e=78, n=20

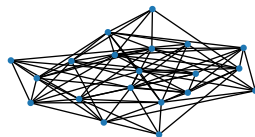

e=80, n=20

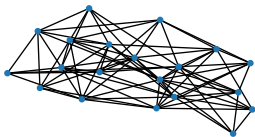

e=81, n=20

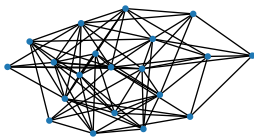

e=71, n=20

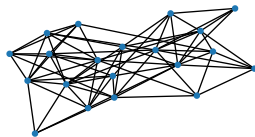

e=77, n=20

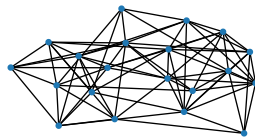

e=79, n=20

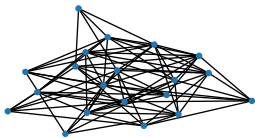

e=69, n=20

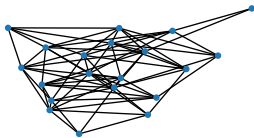

e=60, n=20

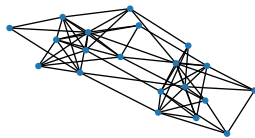

e=67, n=20

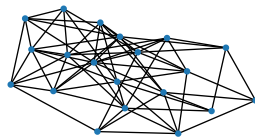

Supplement: supplementary_material [file attachment]

# epoch\_1199\_0.6.pdf

e=14, n=9

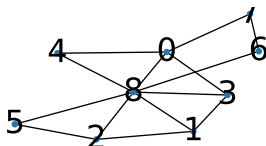

e=11, n=9

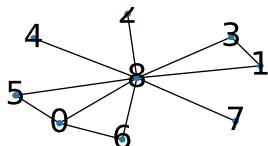

e=14, n=9

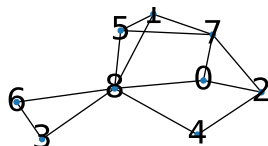

e=13, n=9

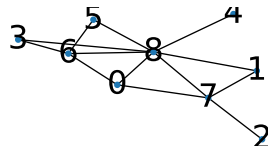

e=11, n=9

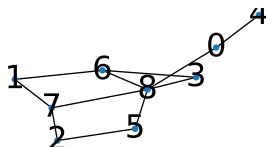

e=13, n=8

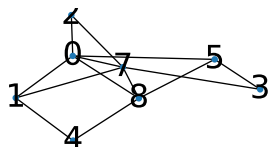

e=12, n=9

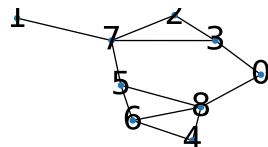

e=11, n=9

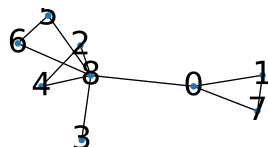

e=13, n=9

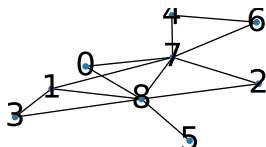

e=16, n=9

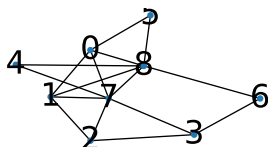

e=12, n=9

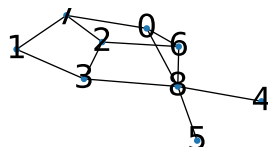

e=16, n=9

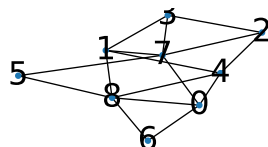

e=12, n=9

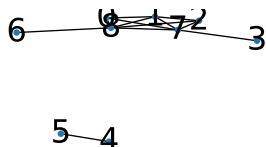

e=16, n=9

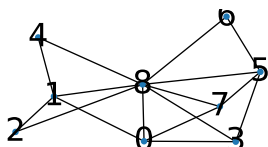

e=9, n=9

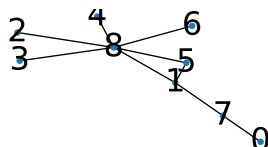

e=15, n=9

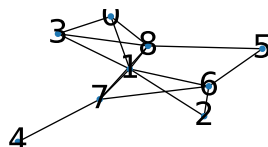

Supplement: supplementary_material [file attachment]

epoch\_3399\_0.2\_init.pdf

e=61, n=20

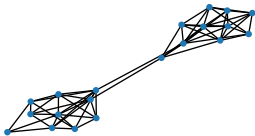

$e=60, n=20$

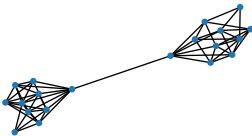
$$e=60, n=20$$
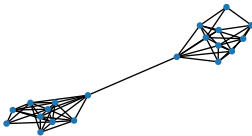

e=61, n=20

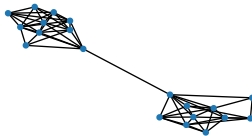

$e=62, n=20$

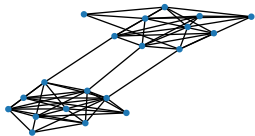

$e=60, n=20$

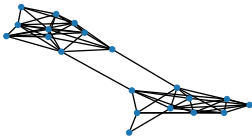
$$e=60, n=20$$
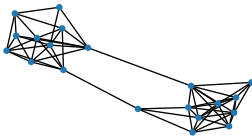

e=62, n=20

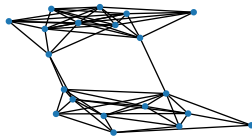

$e=63, n=20$

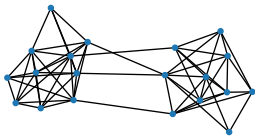
$$e=60, n=20$$
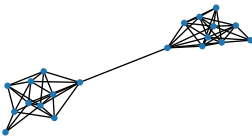
$$e=60, n=20$$
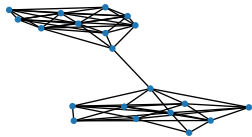

e=61, n=20

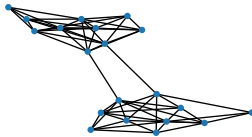

$e=62, n=20$

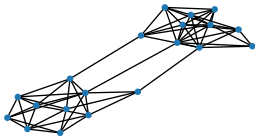

e=61, n=20

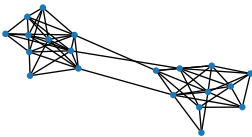

e=61, n=20

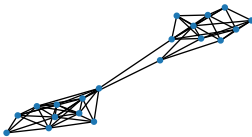

e=62, n=20

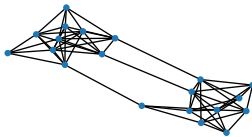

Supplement: supplementary_material [file attachment]

# epoch\_4199\_0.8\_init.pdf

e=13, n=9

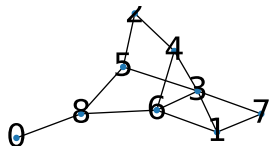

e=15, n=9

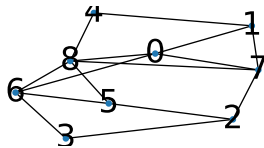

e=14, n=9

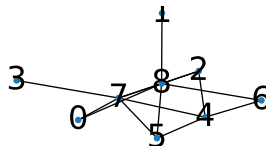

e=13, n=9

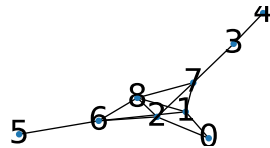

e=13, n=9

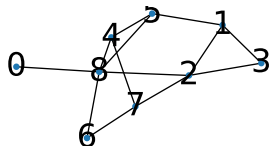

e=13, n=9

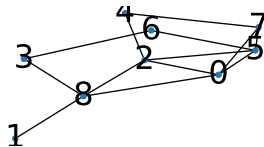

e=15, n=9

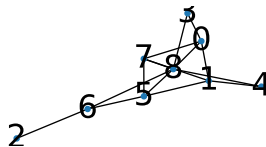

e=10, n=9

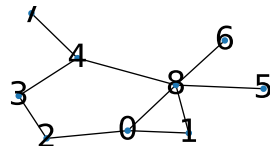

e=12, n=9

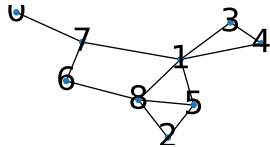

e=14, n=9

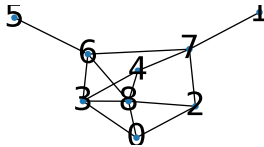

e=10, n=9

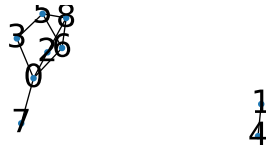

e=21, n=9

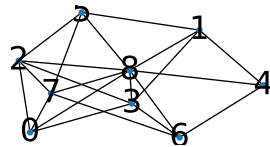

e=15, n=9

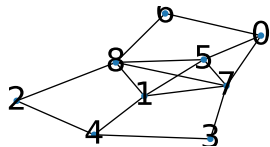

e=12, n=9

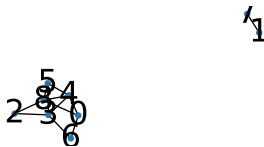

e=13, n=9

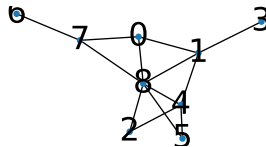

e=12, n=9

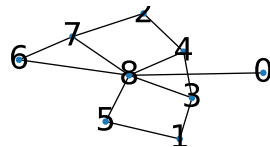

Supplement: supplementary_material [file attachment]

# epoch\_1999\_0.1\_init.pdf

e=9, n=9

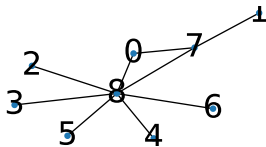

e=8, n=9

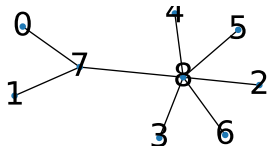

e=10, n=9

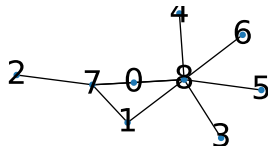

e=8, n=9

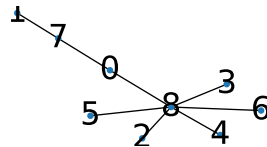

e=8, n=9

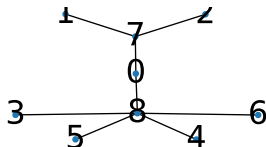

e=8, n=9

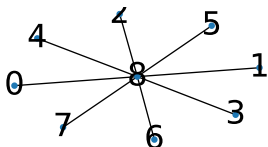

e=10, n=9

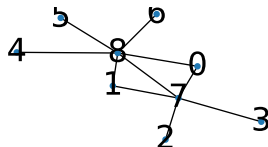

e=9, n=9

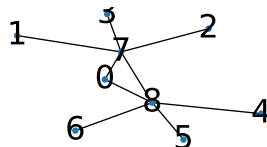

e=11, n=9

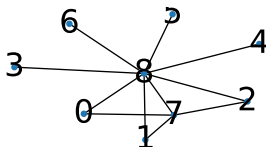

e=8, n=9

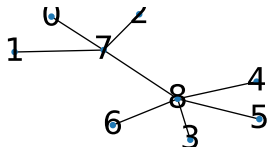

e=13, n=9

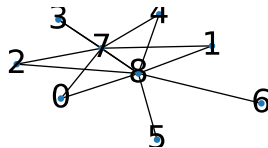

e=12, n=9

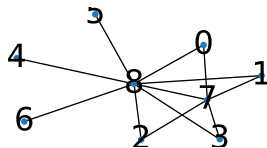

e=8, n=9

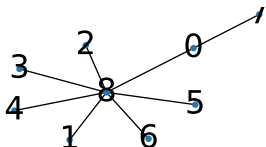

e=11, n=9

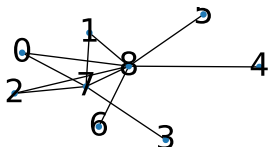

e=12, n=9

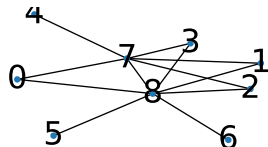

e=10, n=9

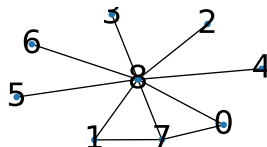

Supplement: supplementary_material [file attachment]

# epoch\_3199\_0.2\_init.pdf

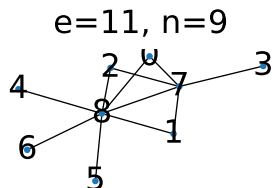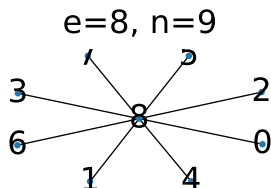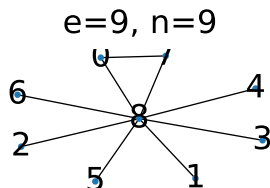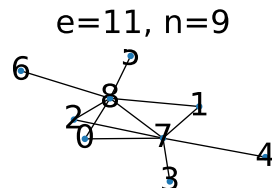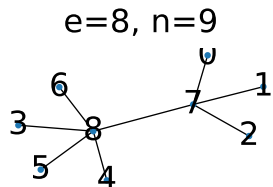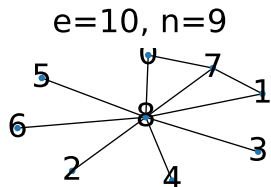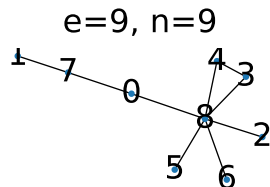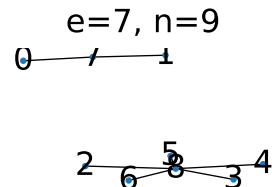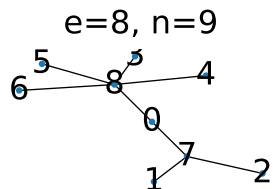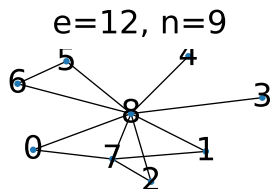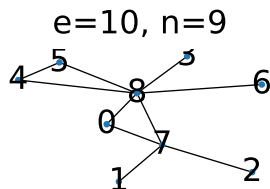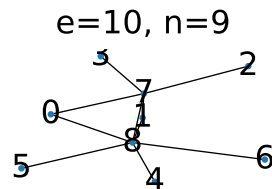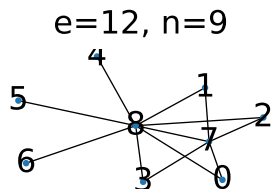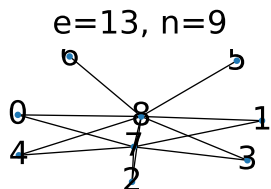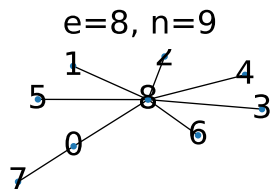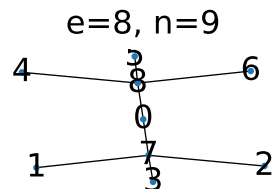

Supplement: supplementary_material [file attachment]

# epoch\_1199\_0.1.pdf

e=10, n=9

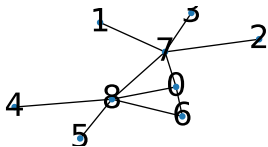

e=12, n=9

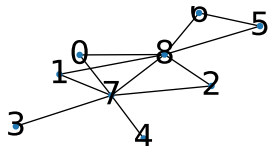

e=9, n=9

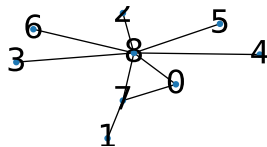

e=13, n=9

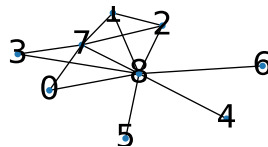

e=11, n=9

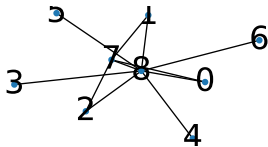

e=11, n=9

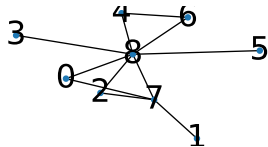

e=8, n=9

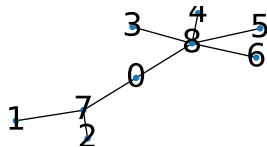

e=11, n=9

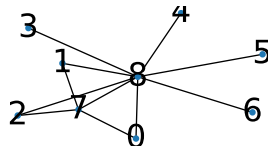

e=13, n=9

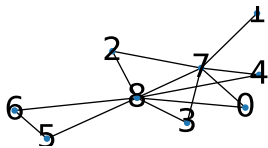

e=10, n=9

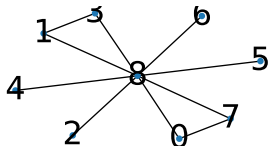

e=12, n=9

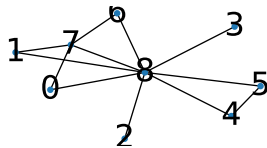

e=14, n=9

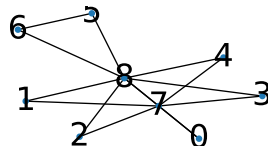

e=12, n=9

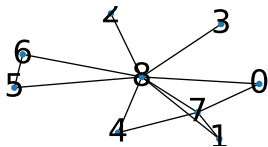

e=10, n=9

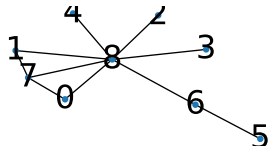

e=8, n=9

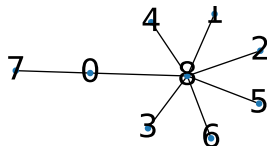

e=12, n=9

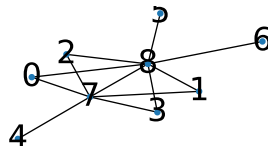

Supplement: supplementary_material [file attachment]

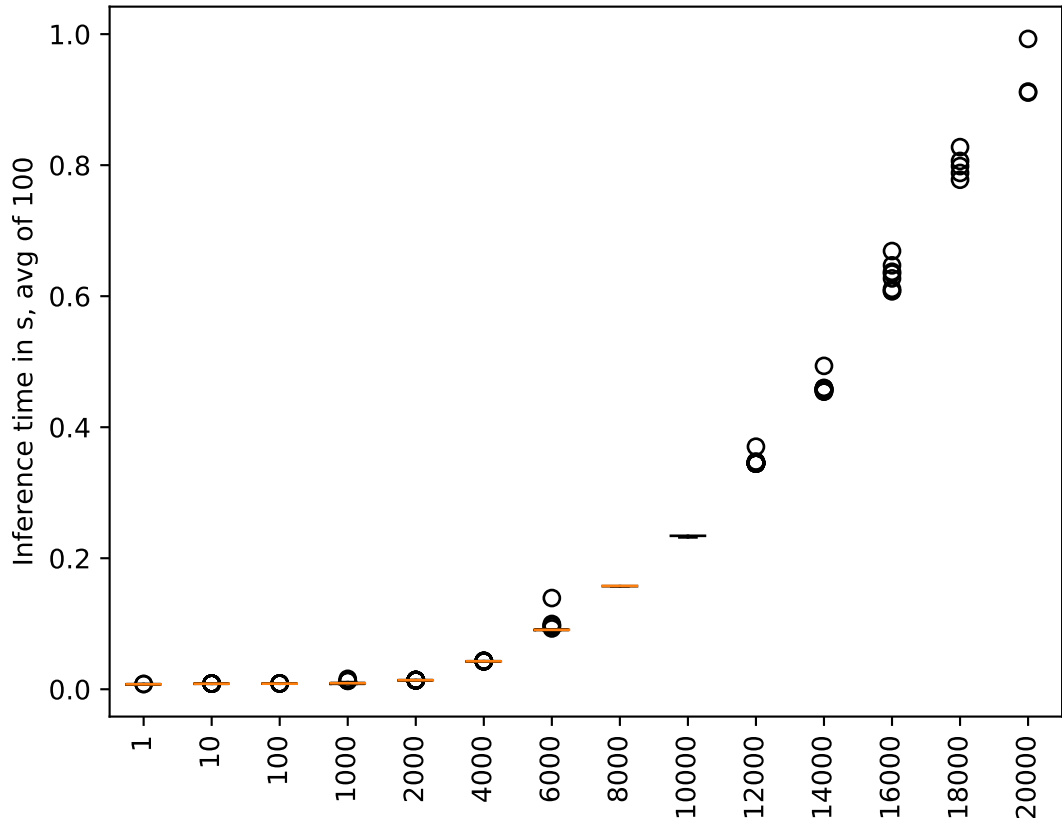

Supplement: supplementary_material [file attachment]

epoch\_4799\_0.1.pdf

e=61, n=20

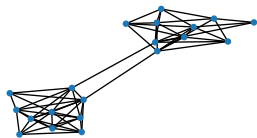

$e=60, n=20$

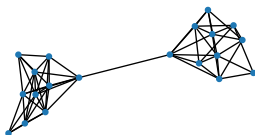

e=62, n=20

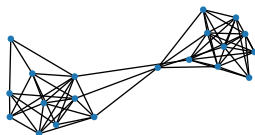

e=60, n=20

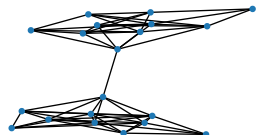

$e=60, n=20$

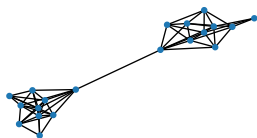

e=59, n=20

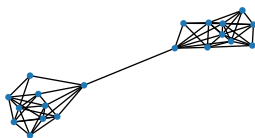

$e=60, n=20$

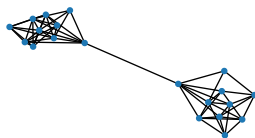

e=60, n=20

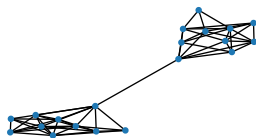

$e=60, n=20$

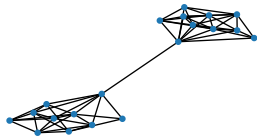

$e=60, n=20$

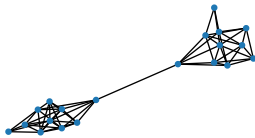

$e=60, n=20$

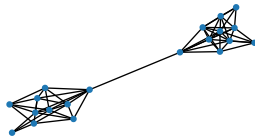

e=59, n=20

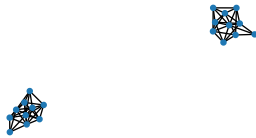

$e=60, n=20$

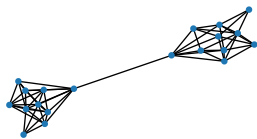
$$e=60, n=20$$
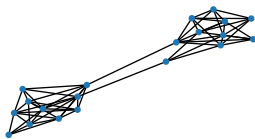

$e=60, n=20$

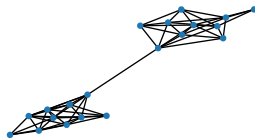

e=60, n=20

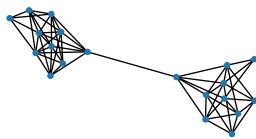

Supplement: supplementary_material [file attachment]

epoch 4999 0.2 init.pdf

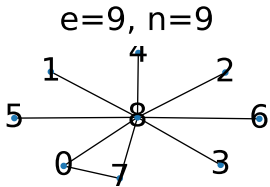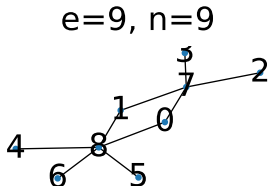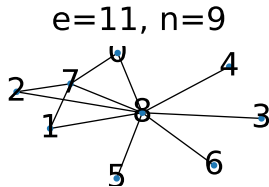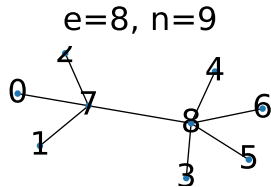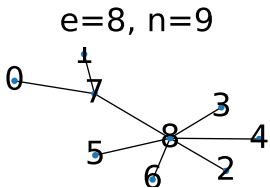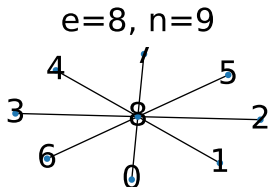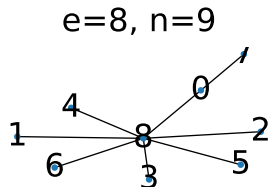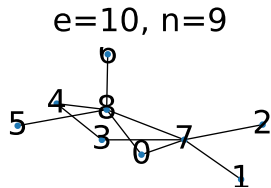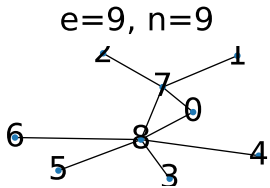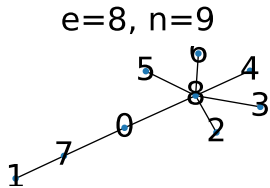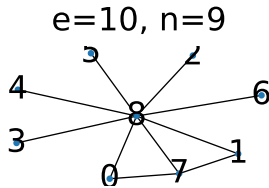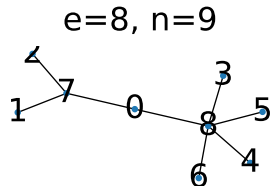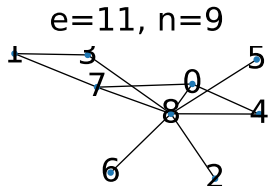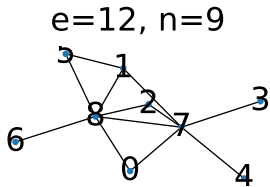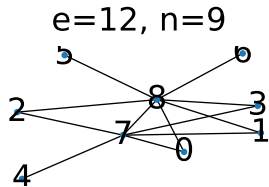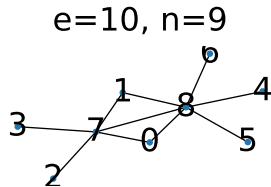

Supplement: supplementary_material [file attachment]

# epoch\_3999\_0.1.pdf

e=10, n=9

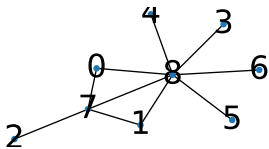

e=8, n=9

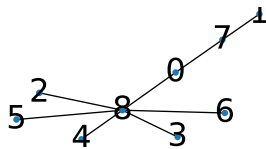

e=11, n=9

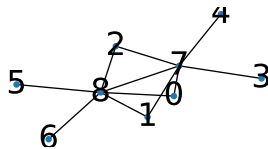

e=9, n=9

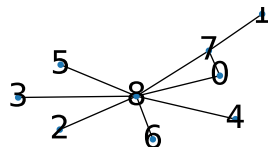

e=9, n=9

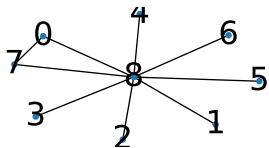

e=9, n=9

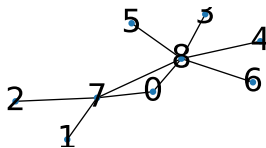

e=8, n=9

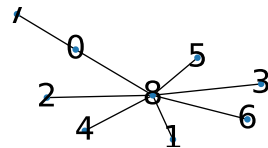

e=12, n=9

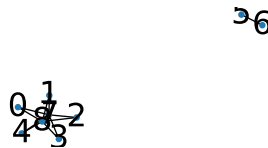

e=11, n=9

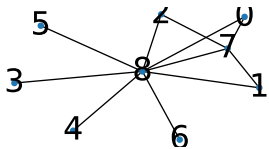

e=8, n=9

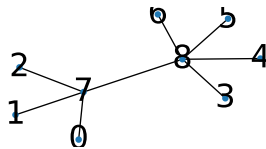

e=10, n=9

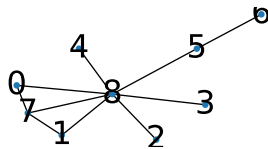

e=11, n=9

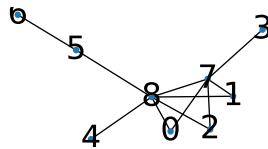

e=10, n=9

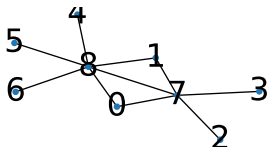

e=8, n=9

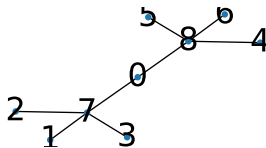

e=12, n=9

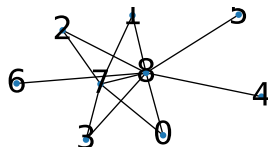

e=8, n=9

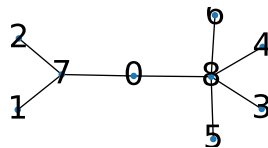

Supplement: supplementary_material [file attachment]

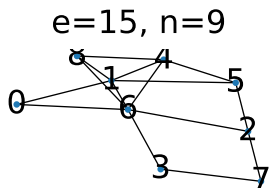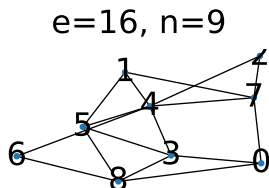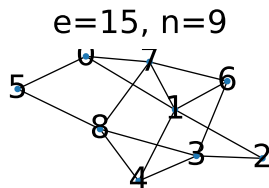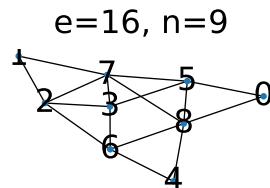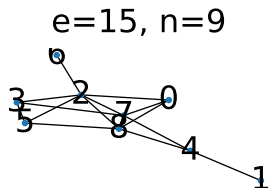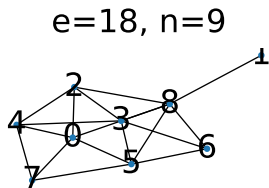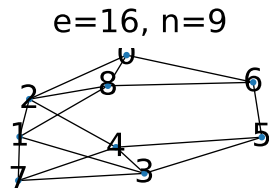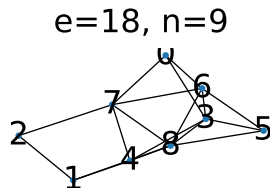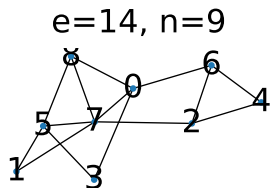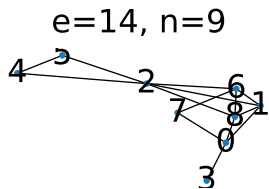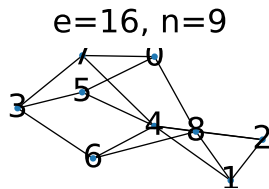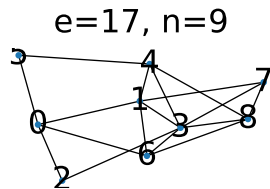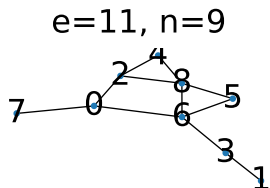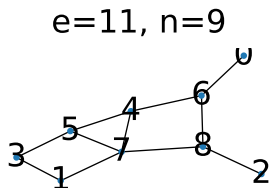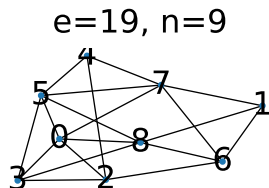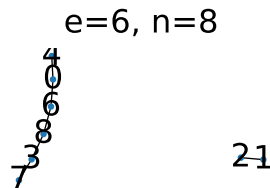

Supplement: supplementary_material [file attachment]

# epoch\_3399\_0.4\_init.pdf

e=6, n=8

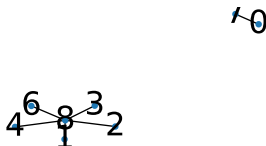

e=14, n=9

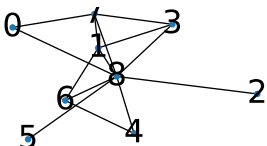

e=14, n=9

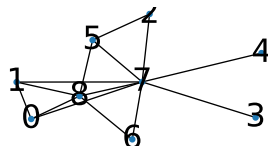

e=13, n=9

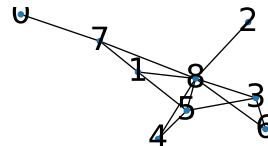

e=9, n=8

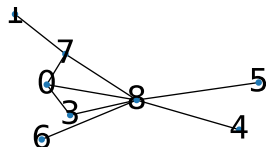

e=9, n=9

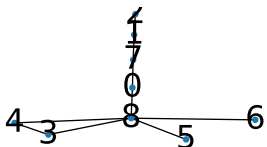

e=12, n=9

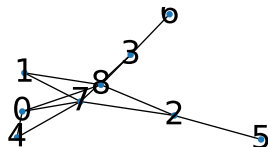

e=6, n=7

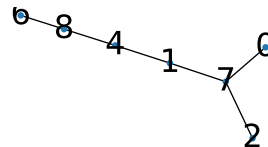

e=13, n=9

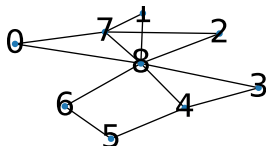

e=14, n=9

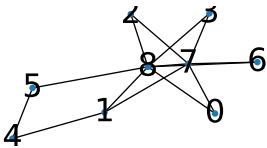

e=9, n=9

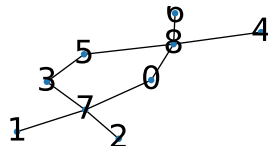

e=12, n=9

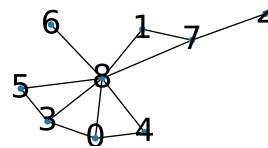

e=12, n=9

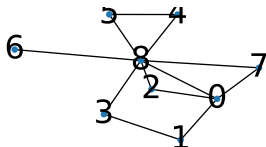

e=18, n=9

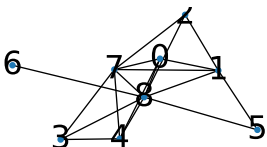

e=10, n=7

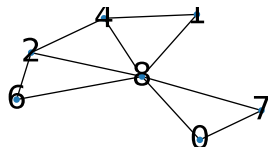

e=14, n=9

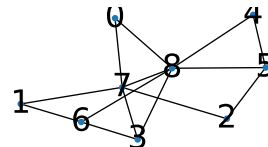

Supplement: supplementary_material [file attachment]

# epoch\_2199\_0.8\_init.pdf

e=9, n=9

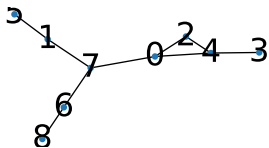

e=17, n=9

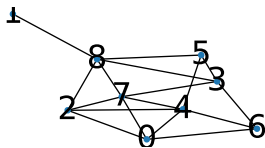

e=10, n=8

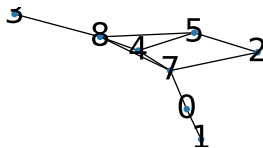

e=14, n=9

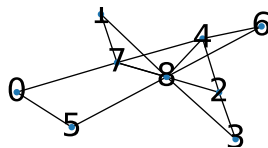

e=11, n=8

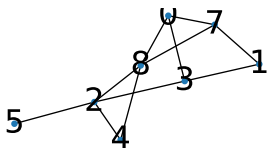

e=13, n=9

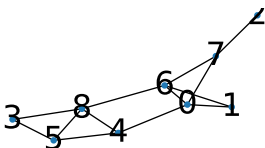

e=13, n=9

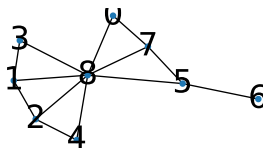

e=13, n=8

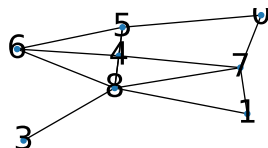

e=15, n=9

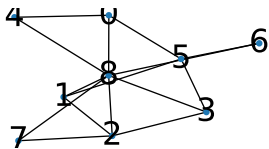

e=13, n=9

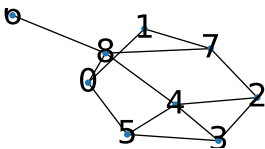

e=11, n=8

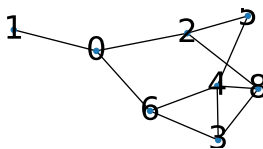

e=16, n=9

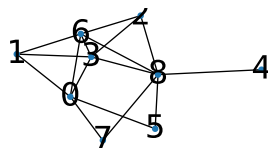

e=13, n=9

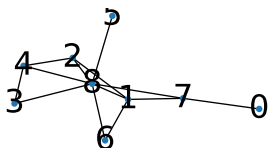

e=14, n=9

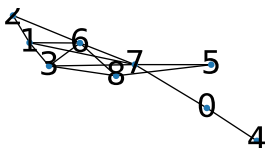

e=12, n=9

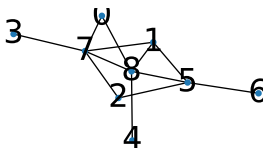

e=11, n=8

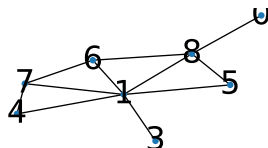

Supplement: supplementary_material [file attachment]

# epoch\_799\_0.2\_init.pdf

e=8, n=9

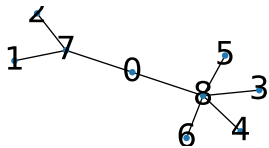

e=10, n=9

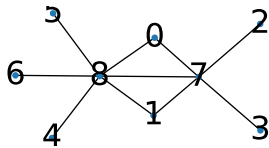

e=8, n=9

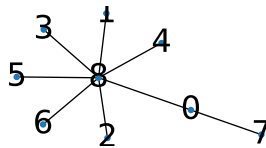

e=7, n=8

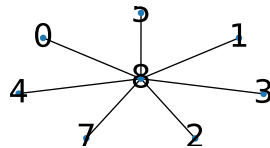

e=11, n=9

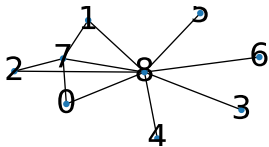

e=9, n=9

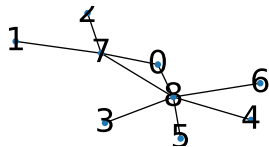

e=12, n=9

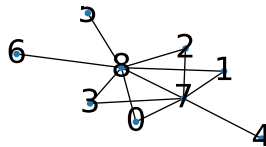

e=7, n=8

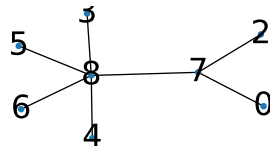

e=9, n=9

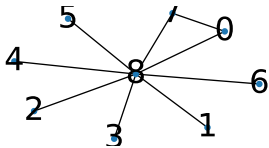

e=8, n=9

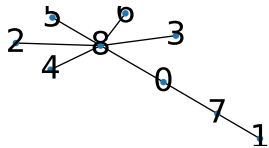

e=8, n=9

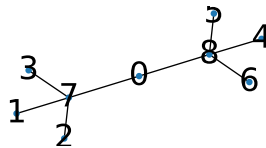

e=8, n=9

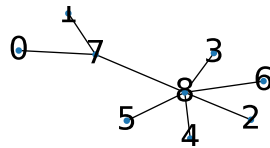

e=13, n=9

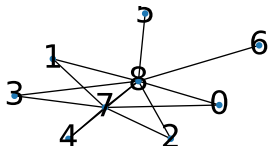

e=11, n=9

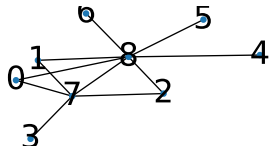

e=9, n=9

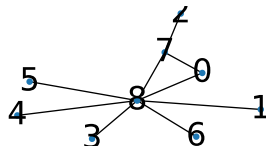

e=10, n=9

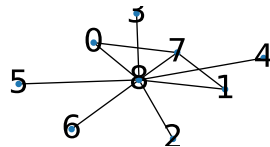

Supplement: supplementary_material [file attachment]

# epoch\_599\_0.2\_init.pdf

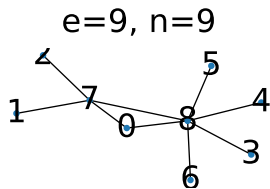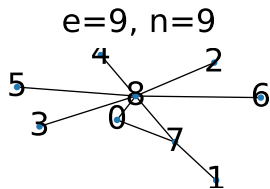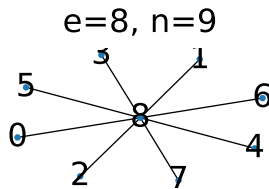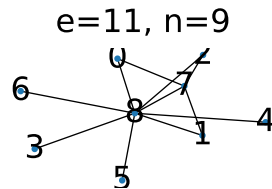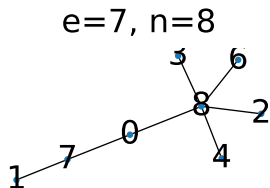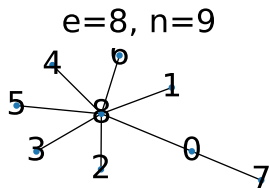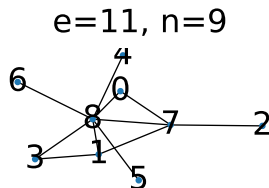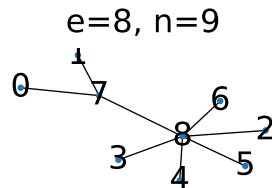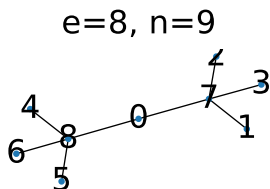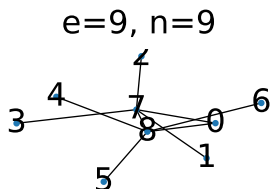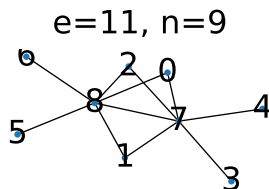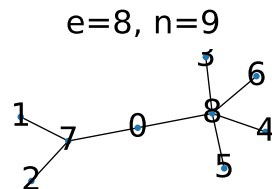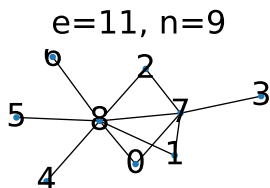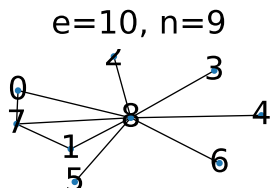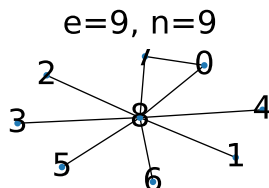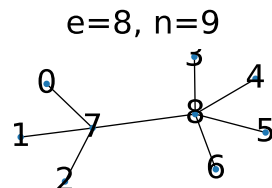

Supplement: supplementary_material [file attachment]

# epoch\_2599\_1.6\_init.pdf

e=16, n=9

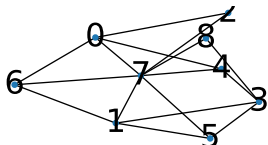

e=15, n=9

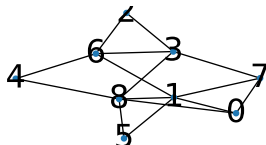

e=15, n=9

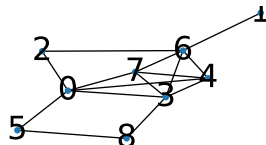

e=17, n=9

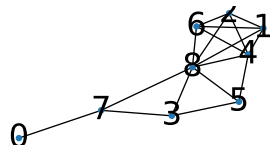

e=18, n=8

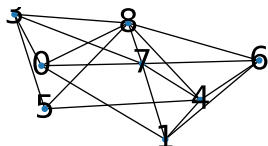

e=17, n=9

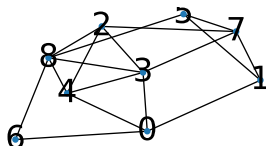

e=13, n=9

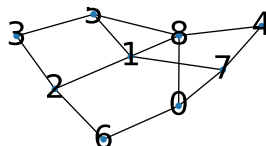

e=20, n=9

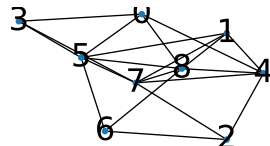

e=18, n=9

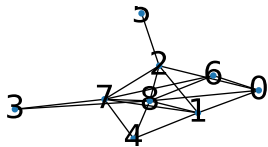

e=18, n=9

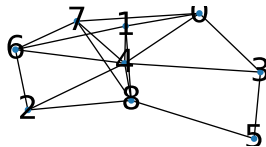

e=8, n=7

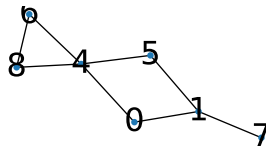

e=15, n=9

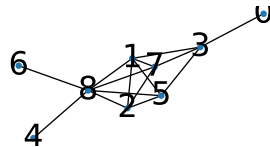

e=22, n=9

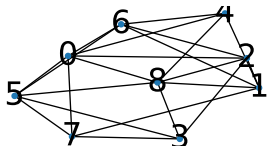

e=16, n=9

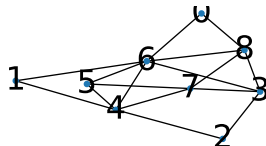

e=16, n=9

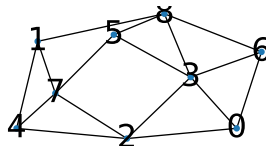

e=17, n=9

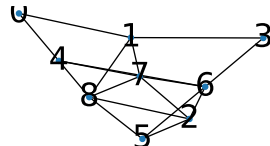

Supplement: supplementary_material [file attachment]

e=71, n=20

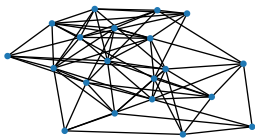

e=71, n=20

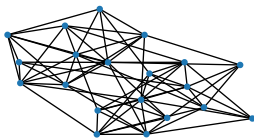

e=78, n=20

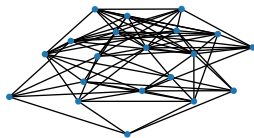

e=74, n=20

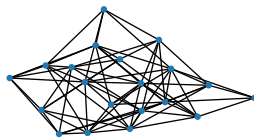

e=82, n=20

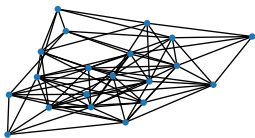

e=69, n=20

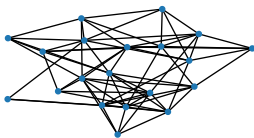

e=78, n=20

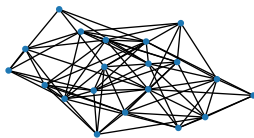

e=72, n=20

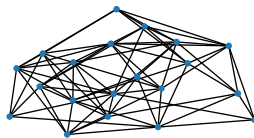

e=81, n=20

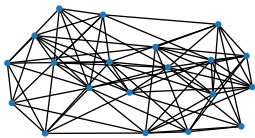

e=77, n=20

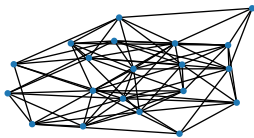

e=73, n=20

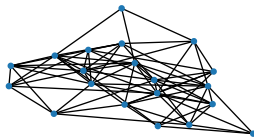

e=73, n=20

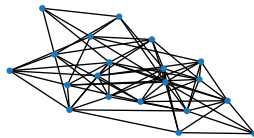

e=67, n=20

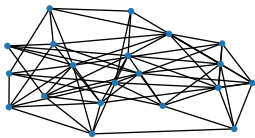

e=78, n=20

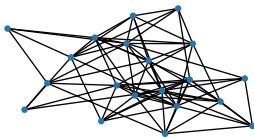

e=78, n=20

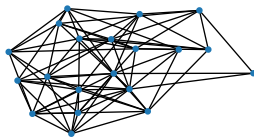

e=81, n=20

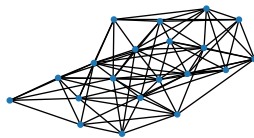

Supplement: supplementary_material [file attachment]

# epoch\_2799\_0.4.pdf

e=12, n=9

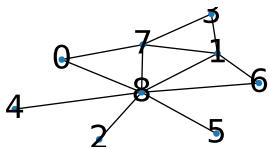

e=14, n=9

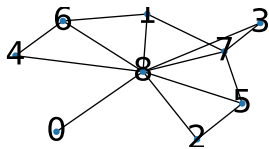

e=10, n=8

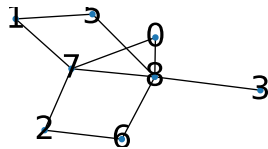

e=12, n=9

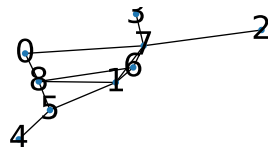

e=12, n=9

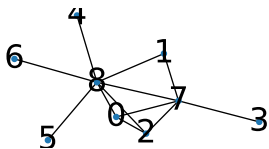

e=12, n=9

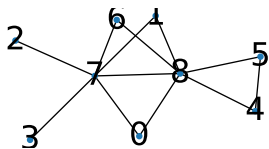

e=11, n=9

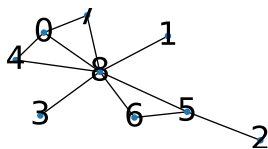

e=8, n=9

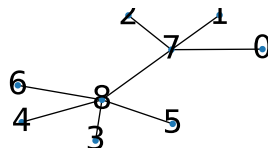

e=13, n=9

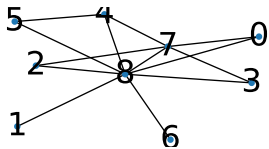

e=10, n=9

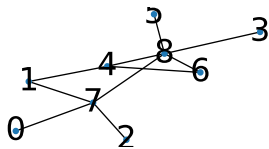

e=15, n=9

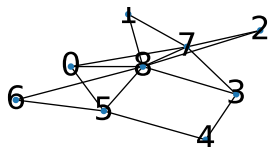

e=12, n=9

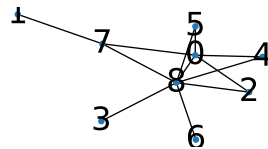

e=12, n=8

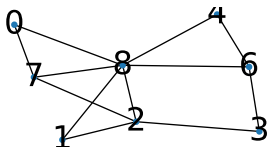

e=12, n=9

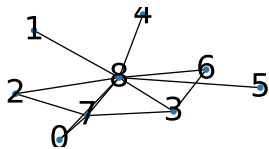

e=12, n=8

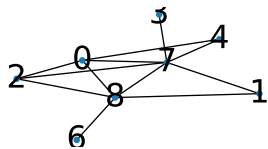

e=12, n=9

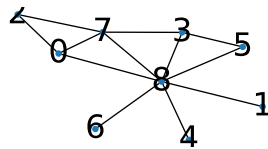

Supplement: supplementary_material [file attachment]

Inference time in s, avg of 100

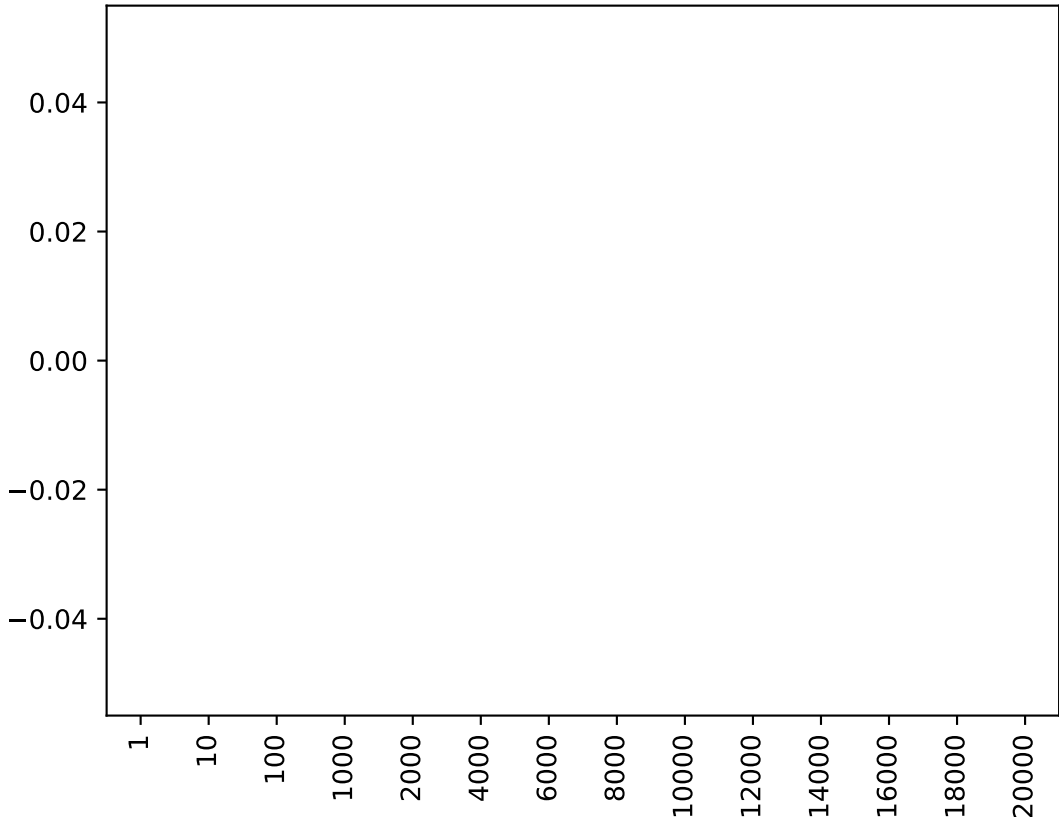

Supplement: supplementary_material [file attachment]

# epoch\_4799\_0.1\_init.pdf

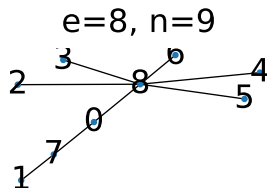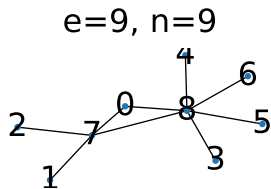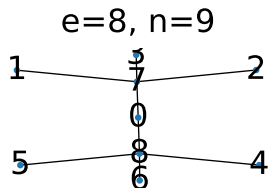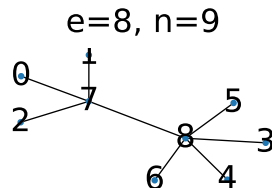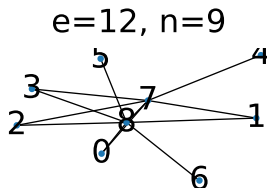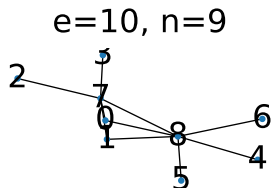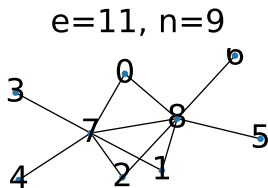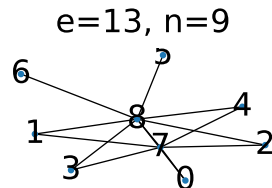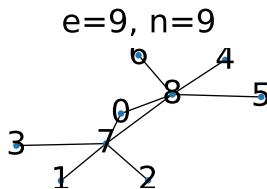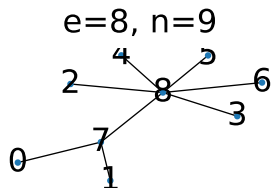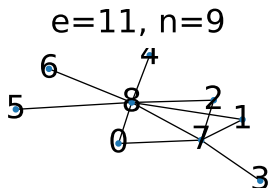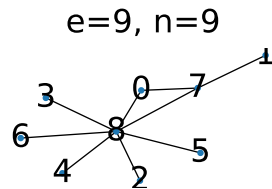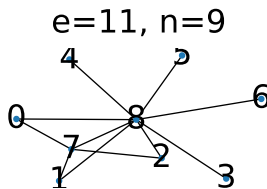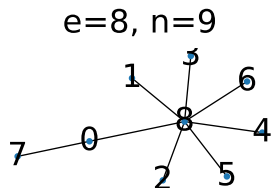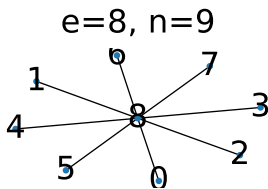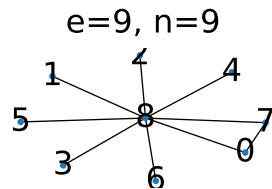

Supplement: supplementary_material [file attachment]

# epoch\_799\_0.1.pdf

e=8, n=9

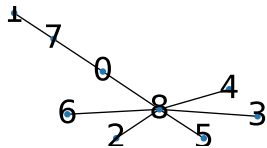

e=11, n=9

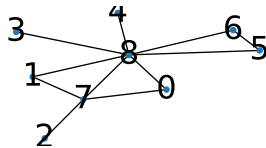

e=9, n=9

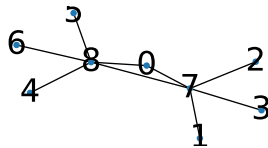

e=7, n=9

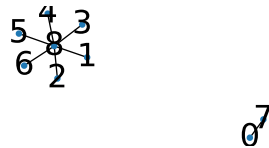

e=11, n=9

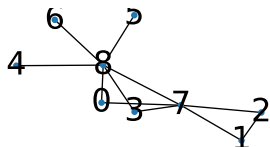

e=11, n=9

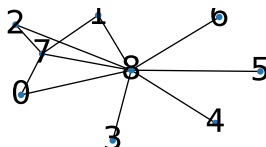

e=11, n=9

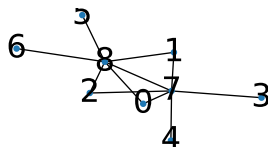

e=12, n=9

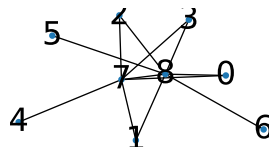

e=10, n=9

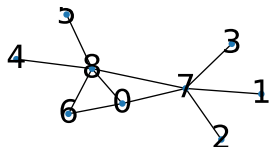

e=13, n=9

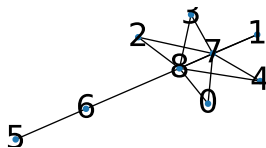

e=9, n=9

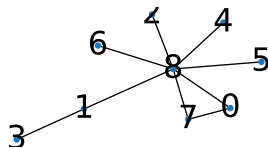

e=11, n=9

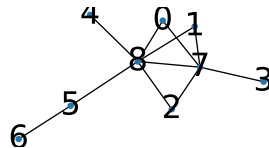

e=9, n=9

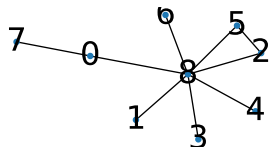

e=9, n=9

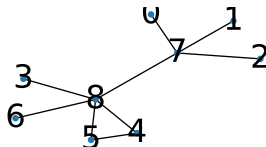

e=10, n=9

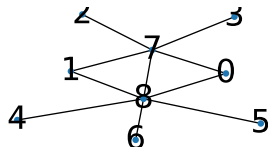

e=10, n=9

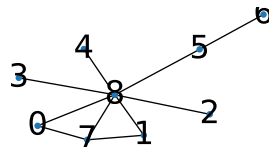

Supplement: supplementary_material [file attachment]

# epoch\_2399\_0.6\_init.pdf

e=8, n=8

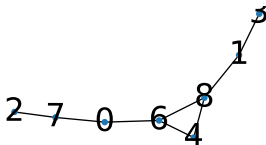

e=13, n=9

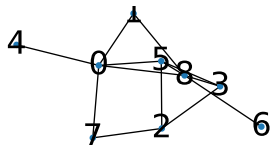

e=8, n=8

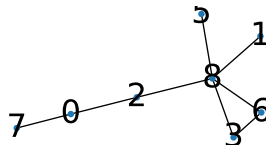

e=10, n=8

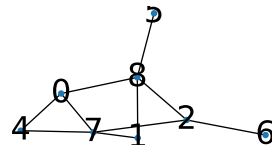

e=15, n=9

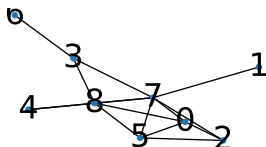

e=18, n=9

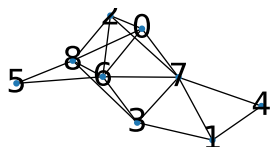

e=14, n=8

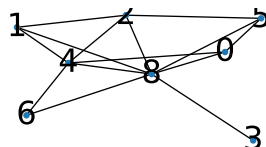

e=9, n=7

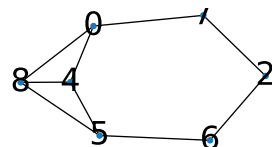

e=10, n=9

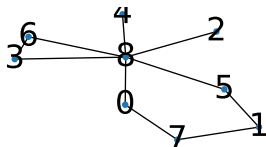

e=10, n=9

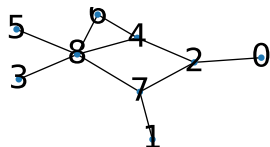

e=13, n=9

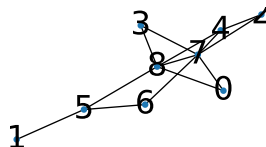

e=16, n=9

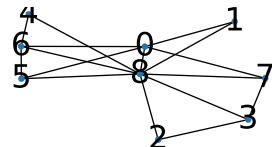

e=10, n=7

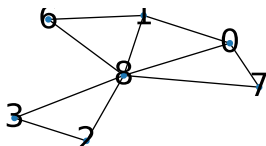

e=13, n=9

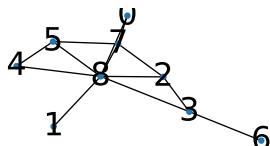

e=16, n=9

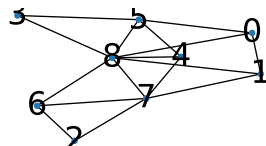

e=16, n=9

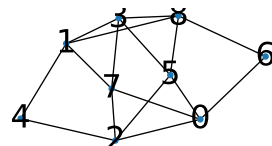

Supplement: supplementary_material [file attachment]

# epoch\_3199\_0.1\_init.pdf

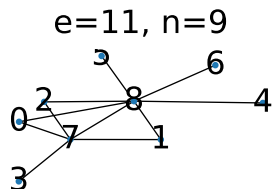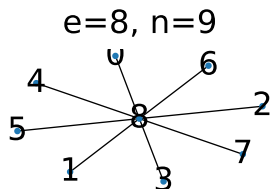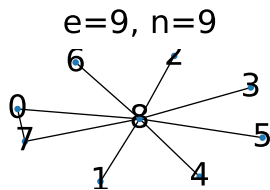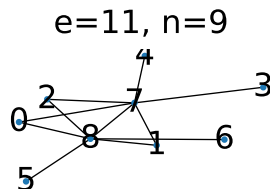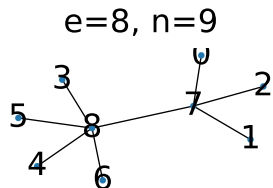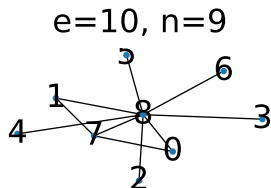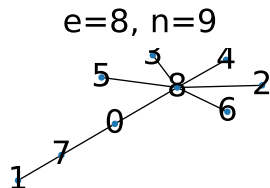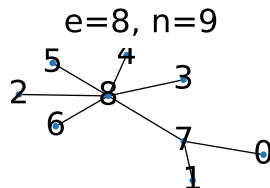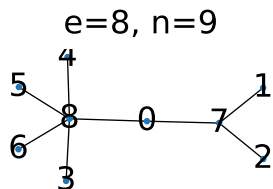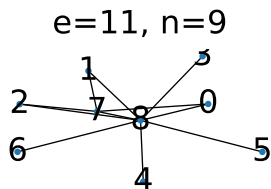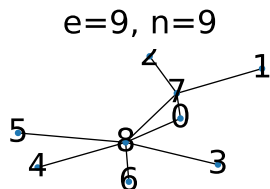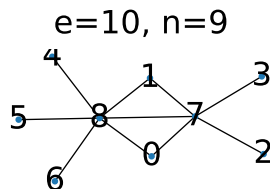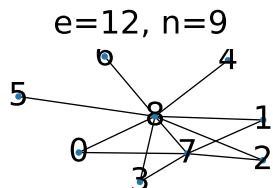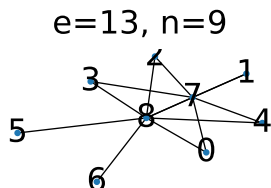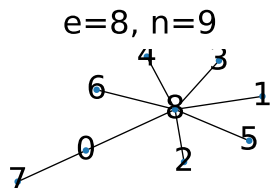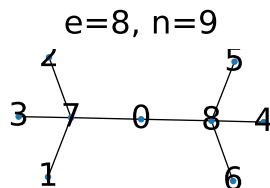

Supplement: supplementary_material [file attachment]

# epoch\_1399\_0.2.pdf

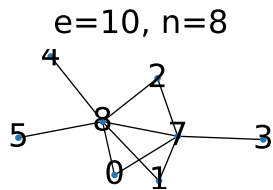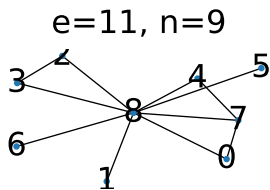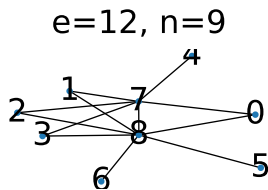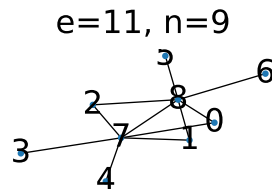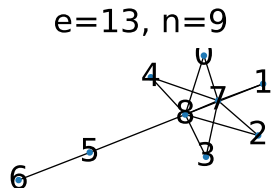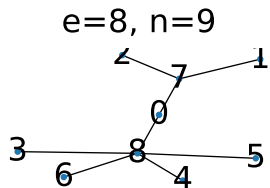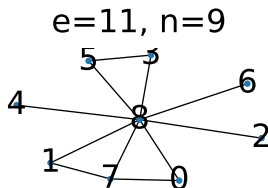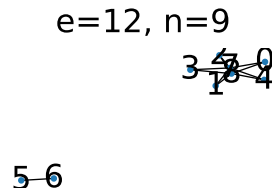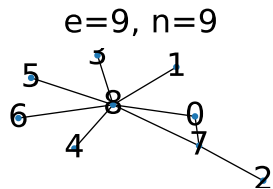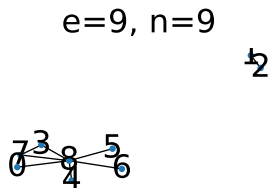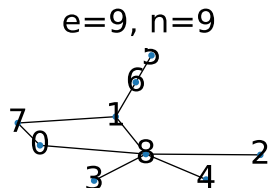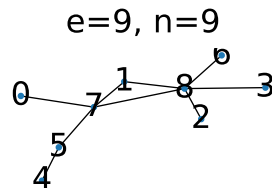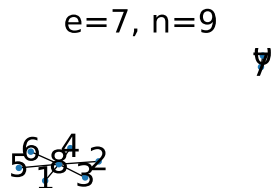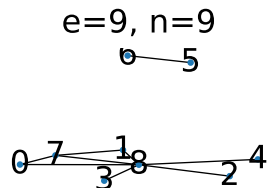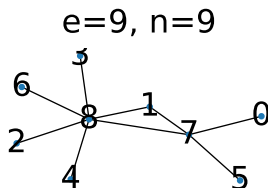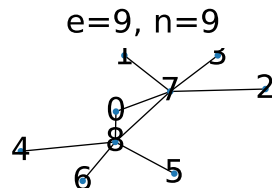

Supplement: supplementary_material [file attachment]

# epoch\_2799\_0.1\_init.pdf

e=12, n=9

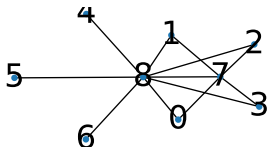

e=8, n=9

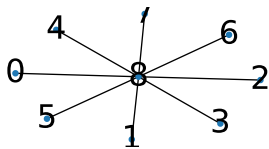

e=8, n=9

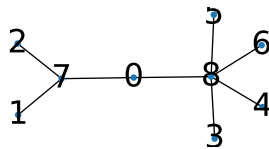

e=10, n=9

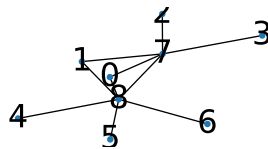

e=11, n=9

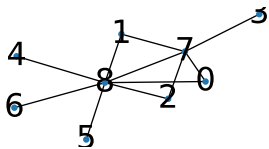

e=9, n=9

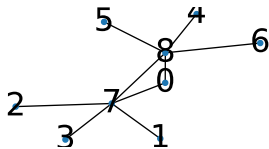

e=8, n=9

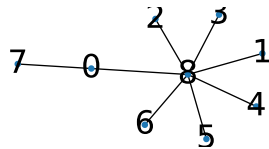

e=9, n=9

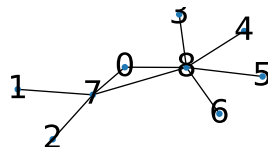

e=13, n=9

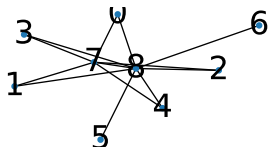

e=8, n=9

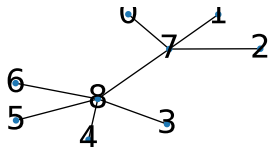

e=12, n=9

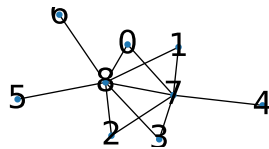

e=9, n=9

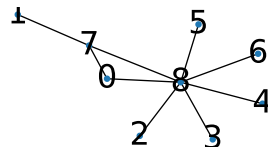

e=9, n=9

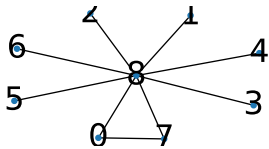

e=11, n=9

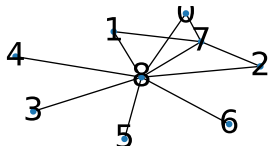

e=11, n=9

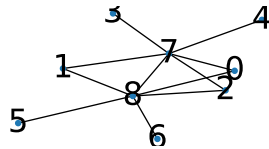

e=10, n=9

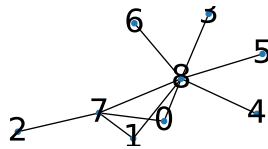

Supplement: supplementary_material [file attachment]

epoch\_1199\_1.6\_init.pdf

e=86, n=20

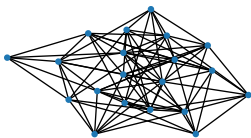

e=90, n=20

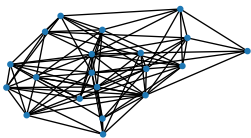

e=81, n=20

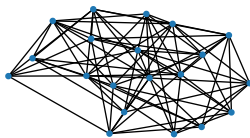

e=77, n=20

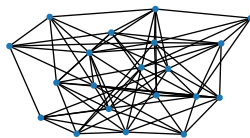

e=89, n=20

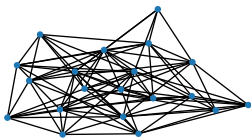

e=92, n=20

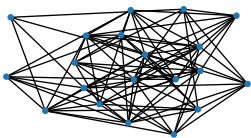

e=89, n=20

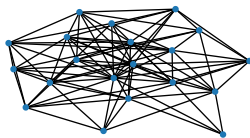

e=78, n=20

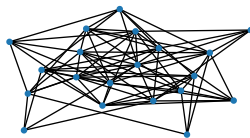

e=85, n=20

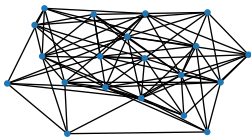

e=92, n=20

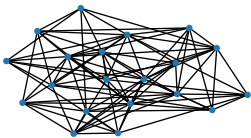

e=94, n=20

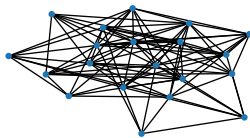

e=81, n=20

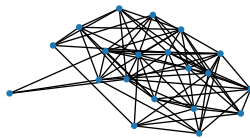

e=101, n=20

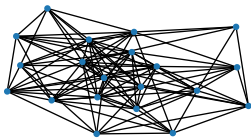

e=94, n=20

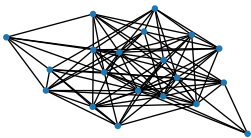

e=82, n=20

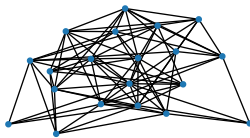

e=79, n=20

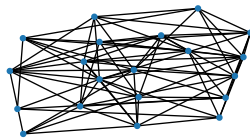

Supplement: supplementary_material [file attachment]

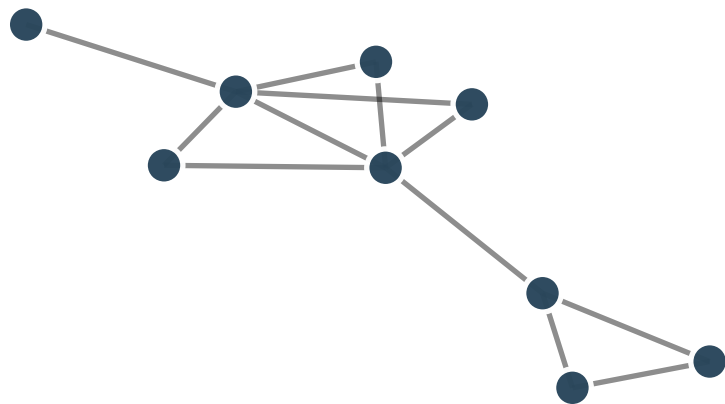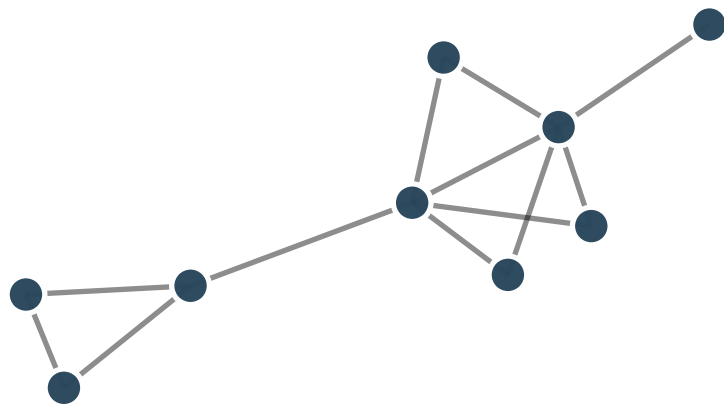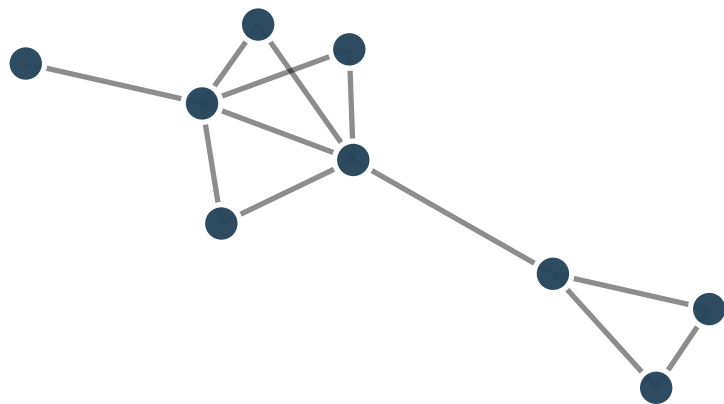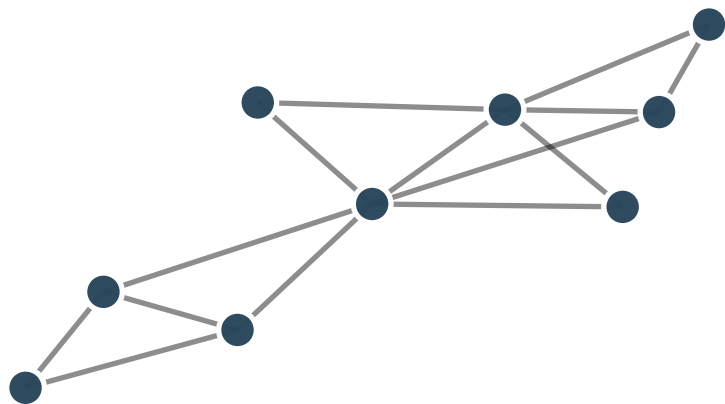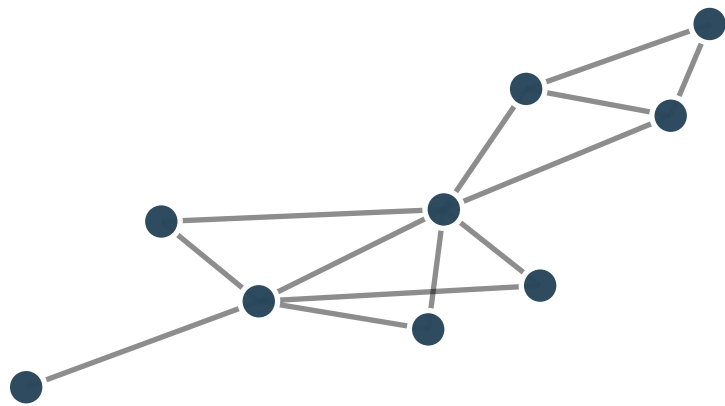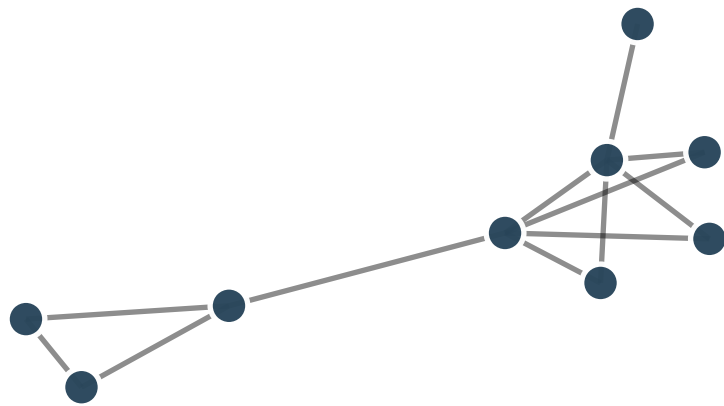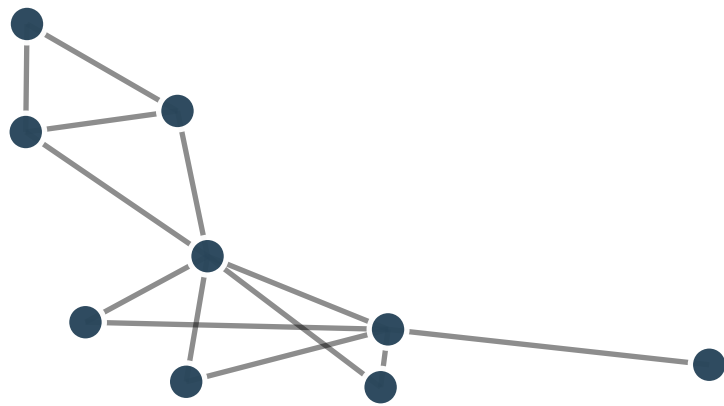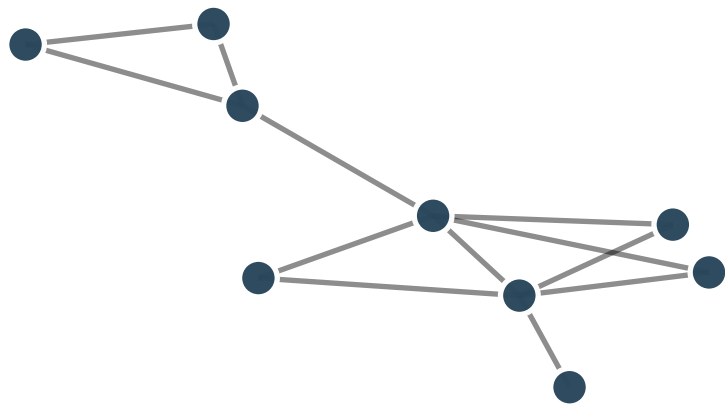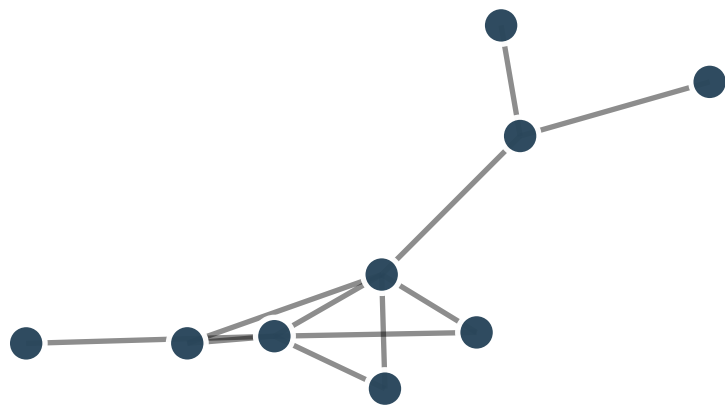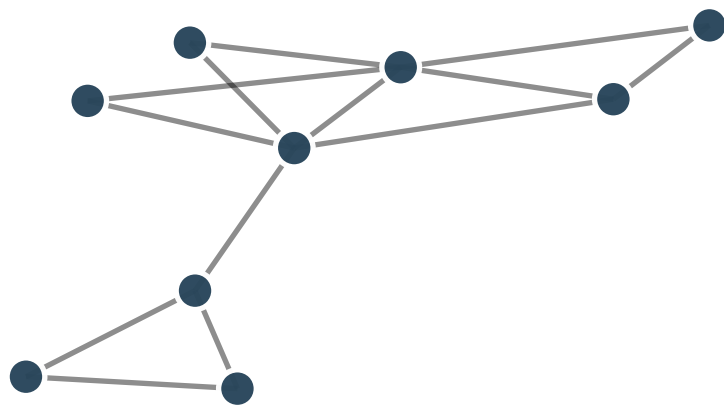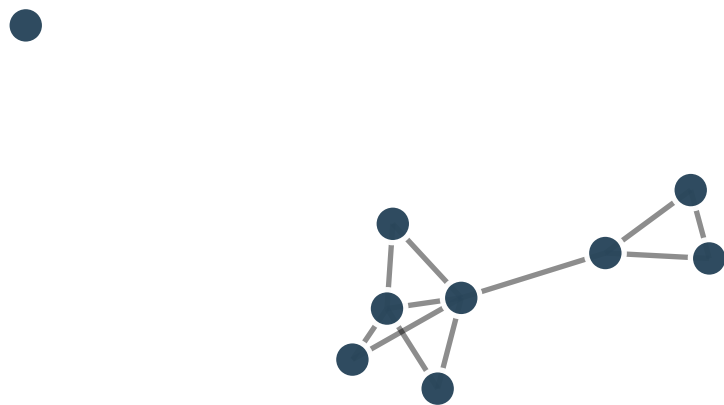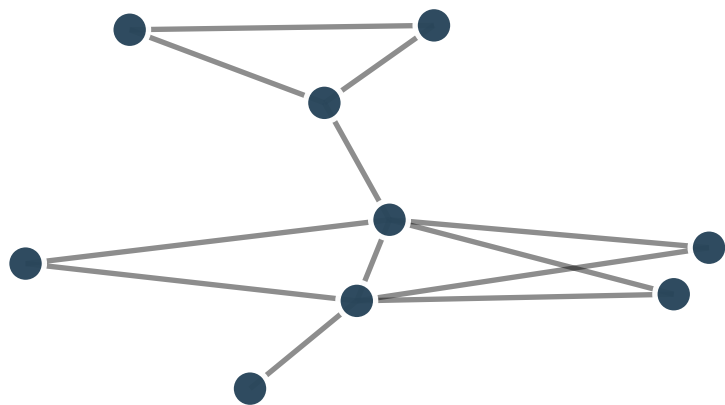

Supplement: supplementary_material [file attachment]

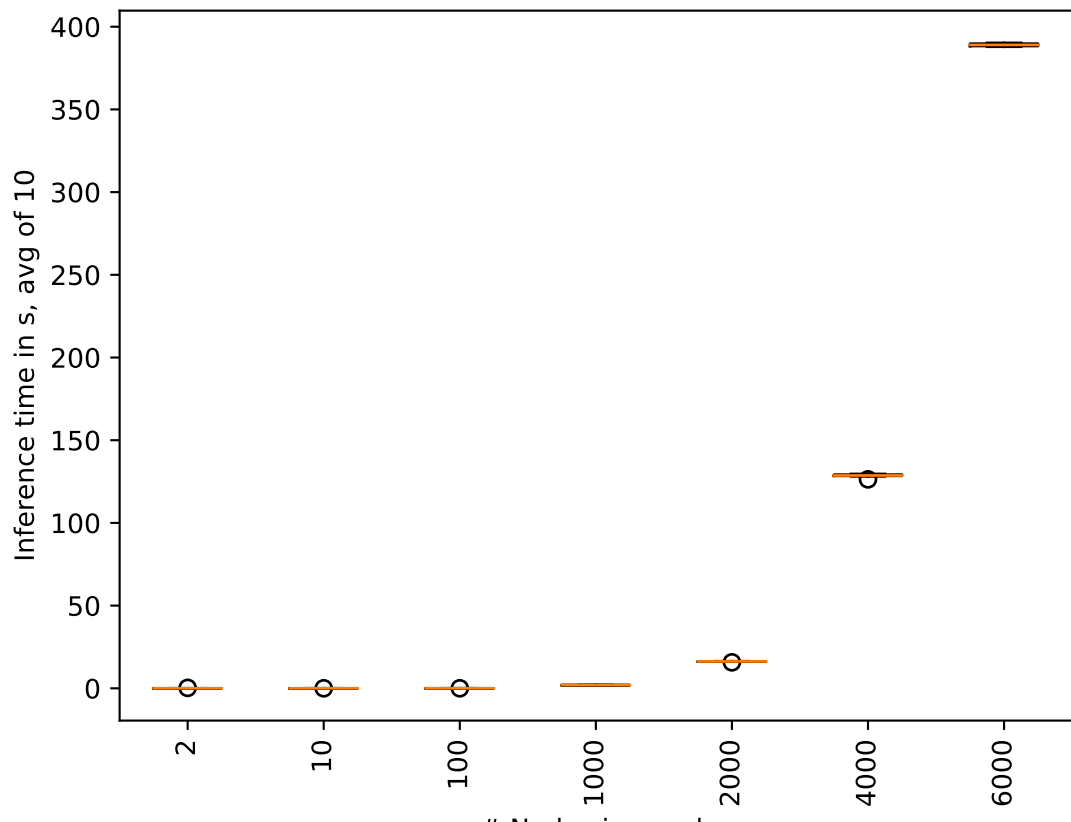

Supplement: supplementary_material [file attachment]

# epoch\_1999\_0.4.pdf

e=13, n=9

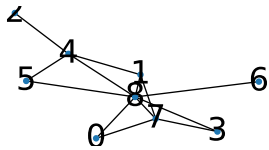

e=11, n=9

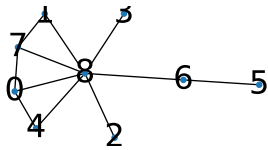

e=10, n=9

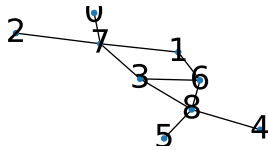

e=15, n=9

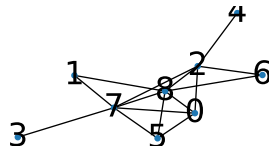

e=10, n=8

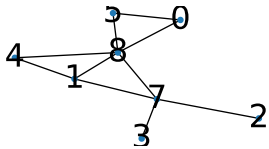

e=13, n=9

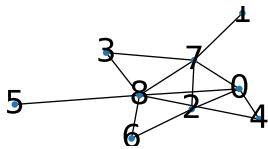

e=12, n=8

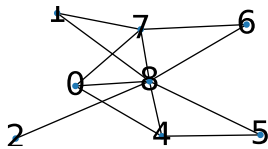

e=12, n=9

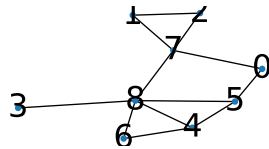

e=11, n=9

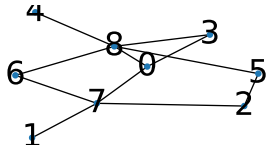

e=8, n=7

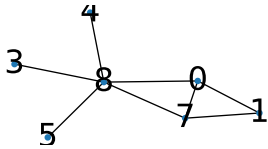

e=10, n=9

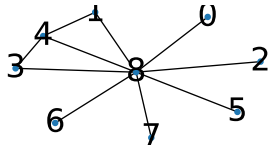

e=15, n=9

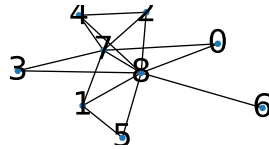

e=11, n=9

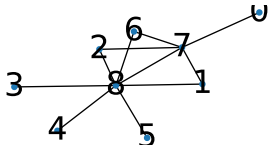

e=13, n=9

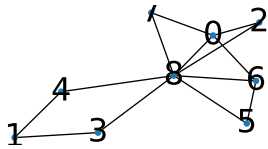

e=12, n=9

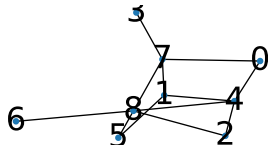

e=12, n=9

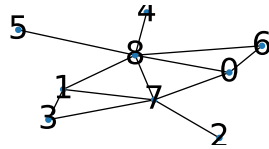

Supplement: supplementary_material [file attachment]

epoch\_3999\_0.6\_init.pdf

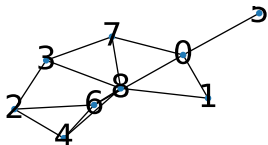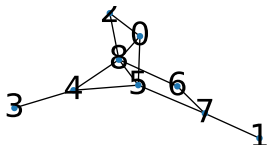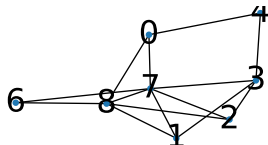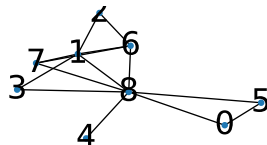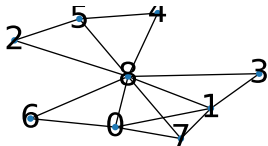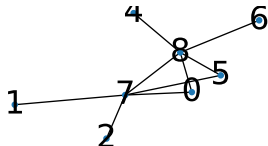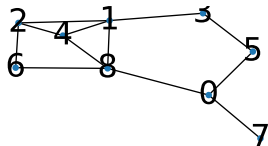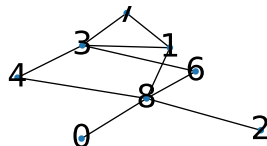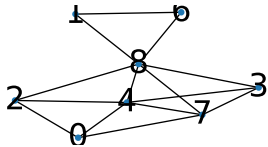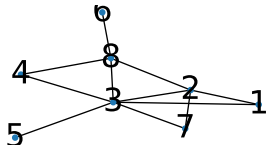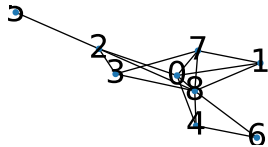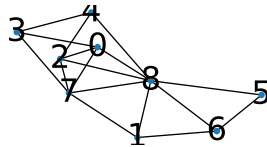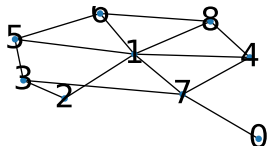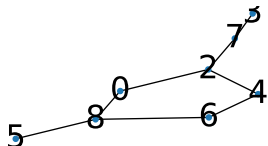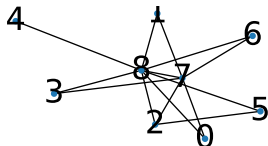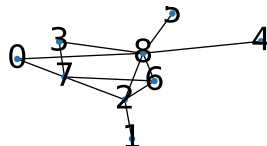

Supplement: supplementary_material [file attachment]

# epoch\_4999\_0.2\_init.pdf

e=8, n=9

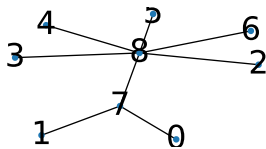

e=9, n=9

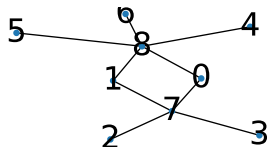

e=11, n=9

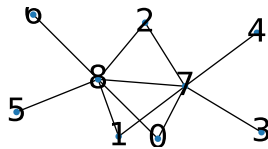

e=9, n=9

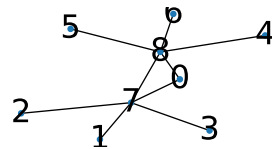

e=11, n=9

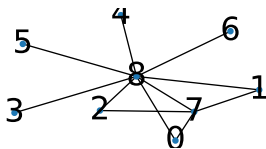

e=11, n=9

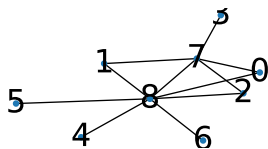

e=13, n=9

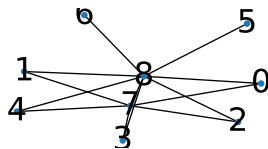

e=11, n=9

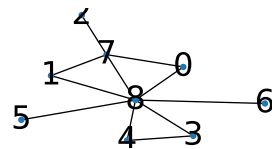

e=9, n=9

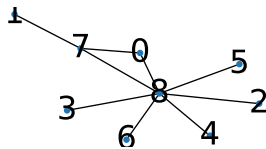

e=12, n=9

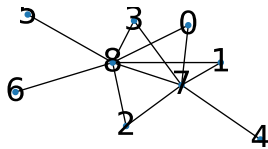

e=12, n=9

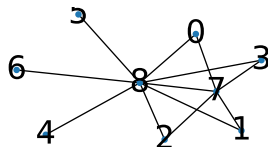

e=10, n=9

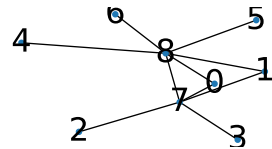

e=10, n=9

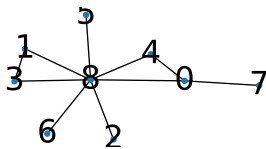

e=9, n=9

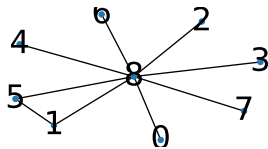

e=8, n=9

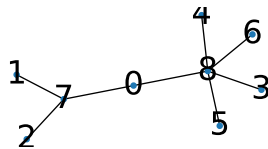

e=8, n=9

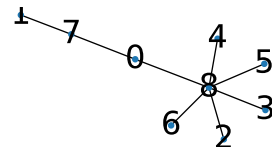

Supplement: supplementary_material [file attachment]

# epoch\_4399\_1.6.pdf

e=17, n=9

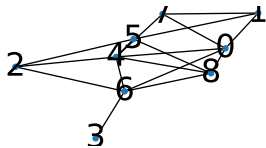

e=14, n=9

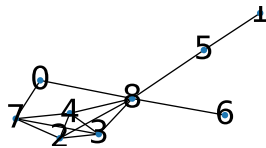

e=17, n=9

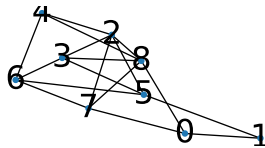

e=16, n=9

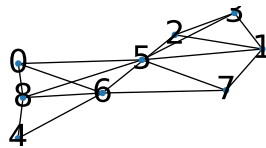

e=12, n=9

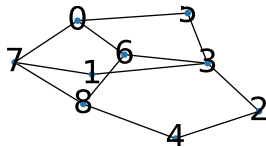

e=14, n=9

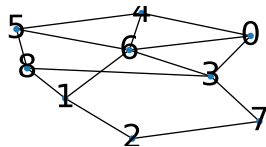

e=20, n=9

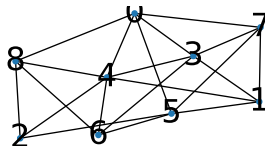

e=17, n=9

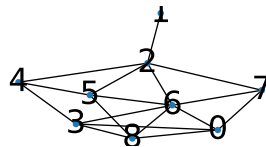

e=19, n=9

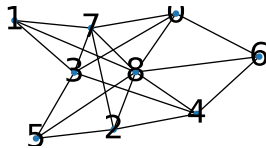

e=14, n=9

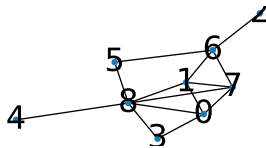

e=20, n=9

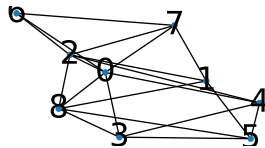

e=19, n=9

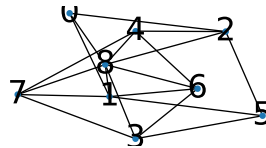

e=15, n=9

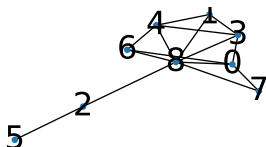

e=17, n=9

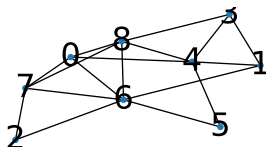

e=15, n=9

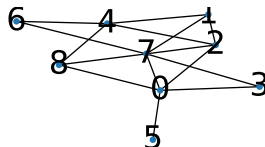

e=13, n=9

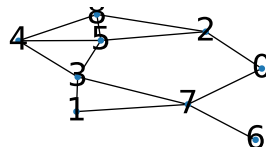

Supplement: supplementary_material [file attachment]

# epoch\_1399\_0.6\_init.pdf

e=16, n=9

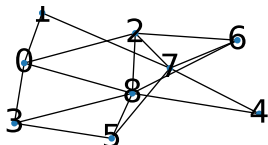

e=17, n=9

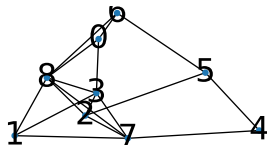

e=15, n=9

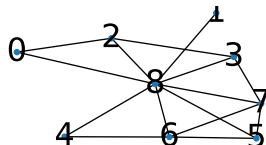

e=10, n=8

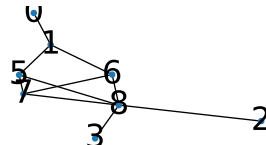

e=13, n=9

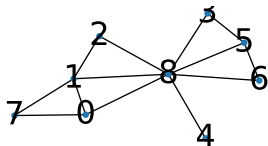

e=14, n=9

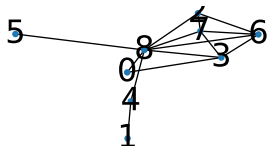

e=16, n=9

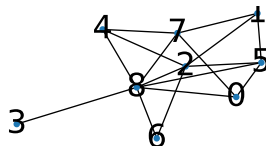

e=11, n=8

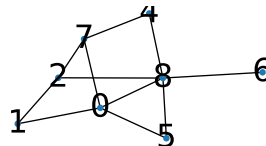

e=17, n=9

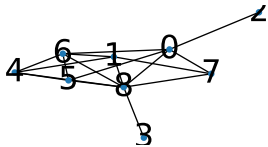

e=15, n=9

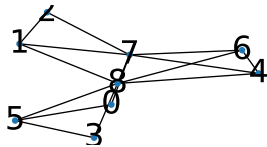

e=11, n=9

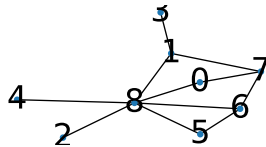

e=14, n=9

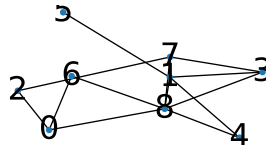

e=9, n=8

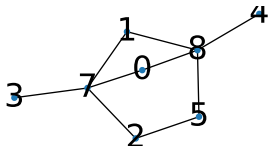

e=11, n=8

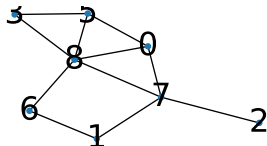

e=9, n=9

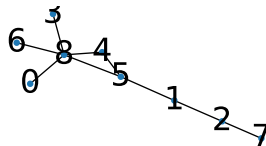

e=16, n=9

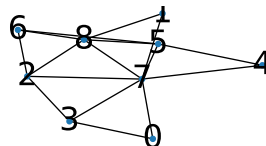

Supplement: supplementary_material [file attachment]

# epoch\_599\_0.8.pdf

e=17, n=9

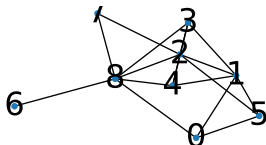

e=17, n=9

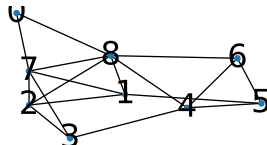

e=11, n=9

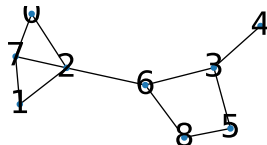

e=16, n=9

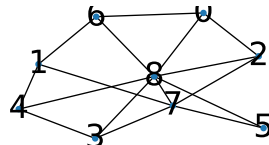

e=13, n=9

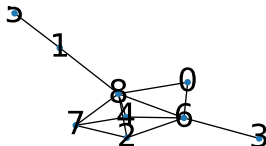

e=7, n=8

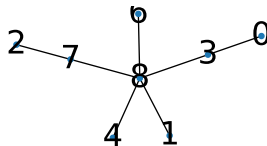

e=10, n=9

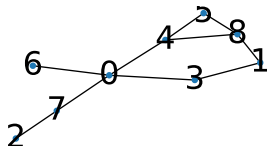

e=14, n=9

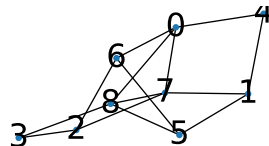

e=11, n=9

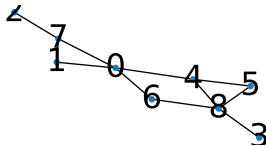

e=8, n=8

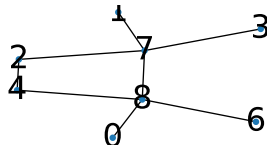

e=15, n=9

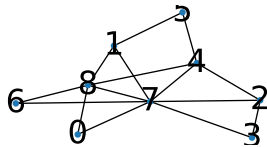

e=14, n=8

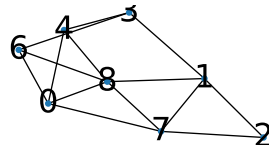

e=12, n=8

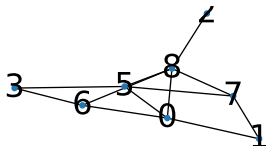

e=15, n=8

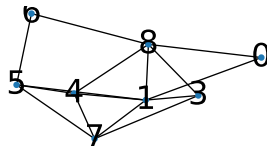

e=13, n=9

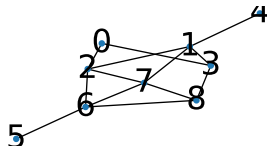

e=10, n=9

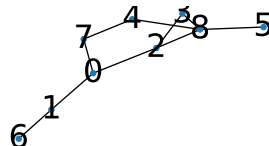

Supplement: supplementary_material [file attachment]

e=76, n=20

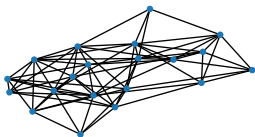

e=78, n=20

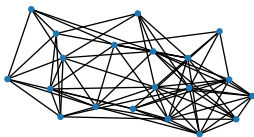

e=81, n=20

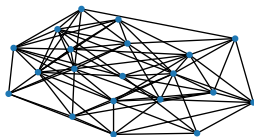

e=69, n=20

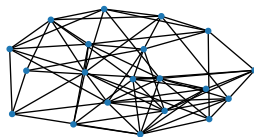

e=77, n=20

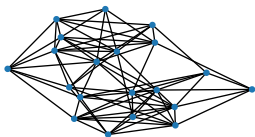

e=72, n=20

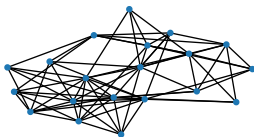

e=86, n=20

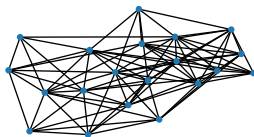

e=91, n=20

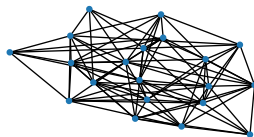

e=71, n=20

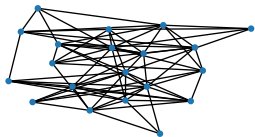

e=76, n=20

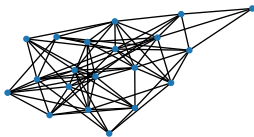

e=72, n=20

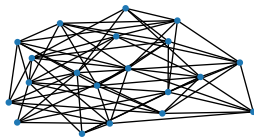

e=81, n=20

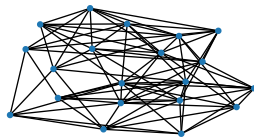

e=75, n=20

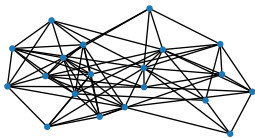

e=77, n=20

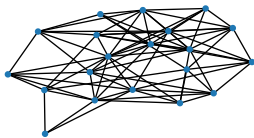

e=76, n=20

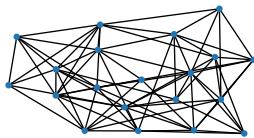

e=80, n=20

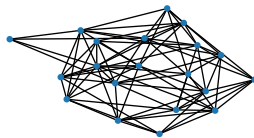

Supplement: supplementary_material [file attachment]

epoch\_1599\_0.8.pdf

e=82, n=20

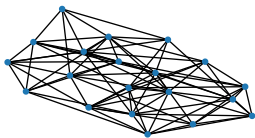

e=71, n=20

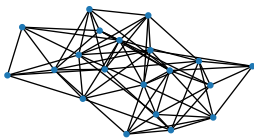

$e=70, n=20$

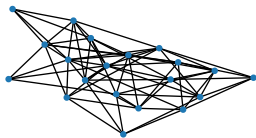

e=73, n=20

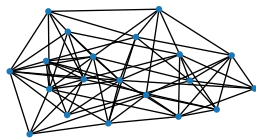

$e=70, n=20$

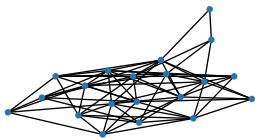

e=91, n=20

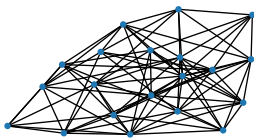

e=69, n=20

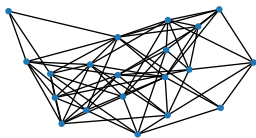

e=91, n=20

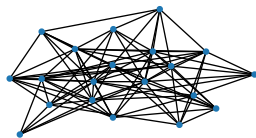

$e=75, n=20$

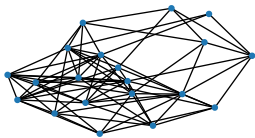

e=77, n=20

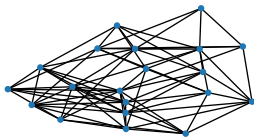

e=72, n=20

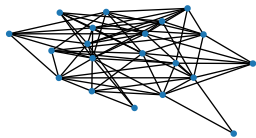

e=81, n=20

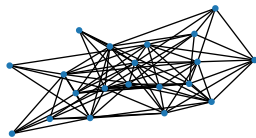

e=64, n=20

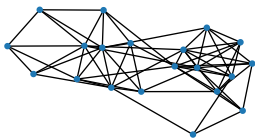

e=64, n=20

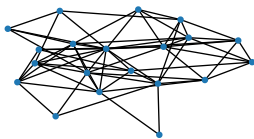

$e=78, n=20$

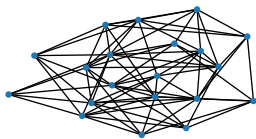

e=82, n=20

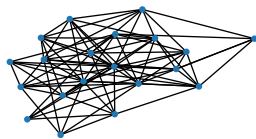

Supplement: supplementary_material [file attachment]

epoch\_1799\_0.4\_init.pdf

e=61, n=20

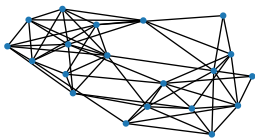

e=69, n=20

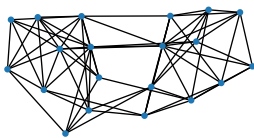

e=65, n=20

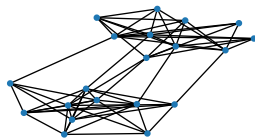

e=70, n=20

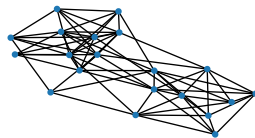

e=70, n=20

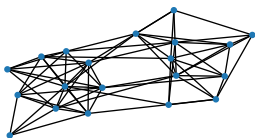

e=70, n=20

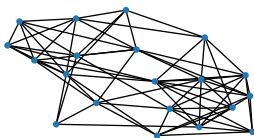

e=73, n=20

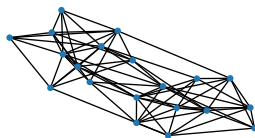

e=60, n=20

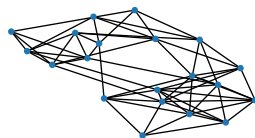

e=59, n=20

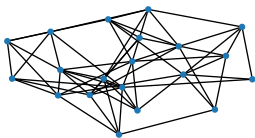

e=69, n=20

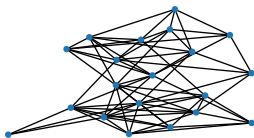

e=63, n=20

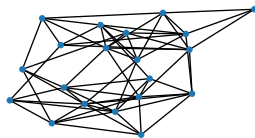

e=66, n=20

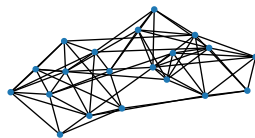

e=71, n=20

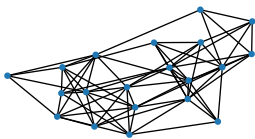

e=73, n=20

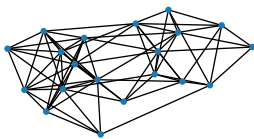

e=69, n=20

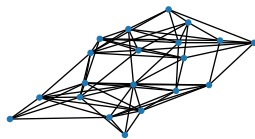

e=65, n=20

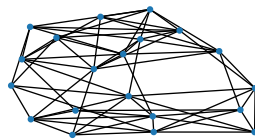

Supplement: supplementary_material [file attachment]

# epoch\_4999\_0.6.pdf

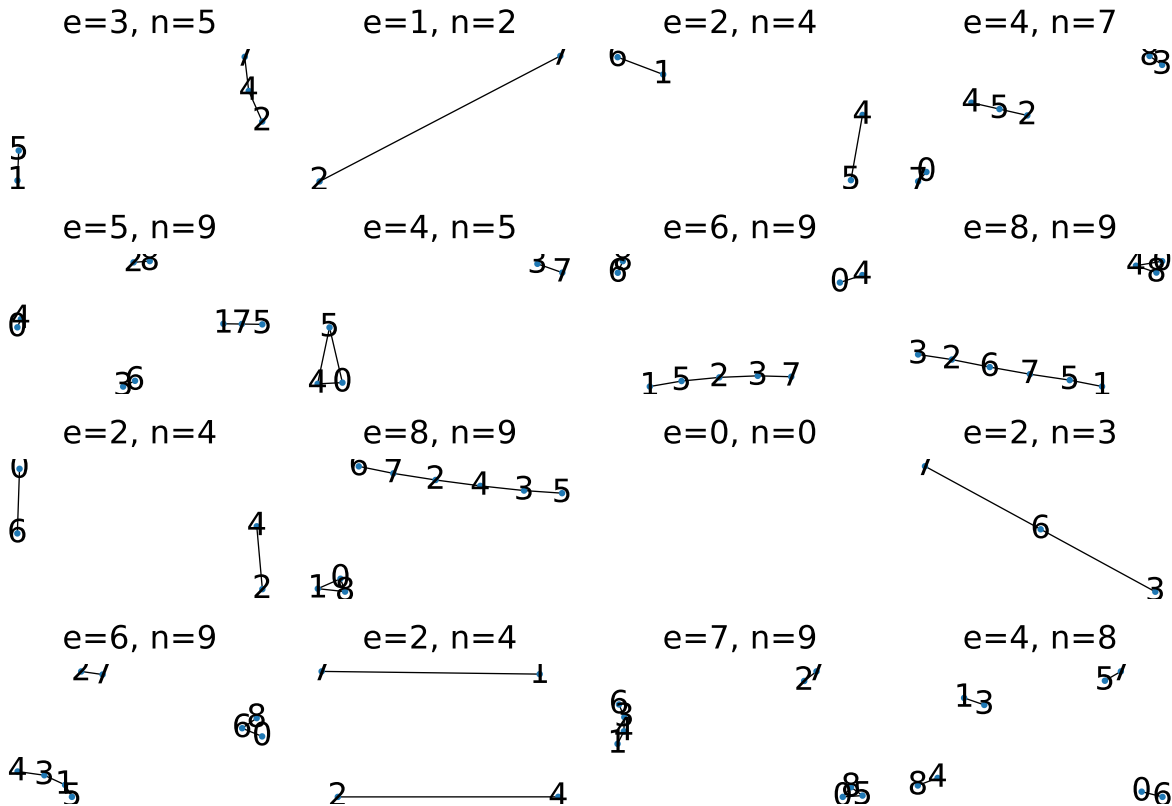

Supplement: supplementary_material [file attachment]

epoch\_399\_0.4.pdf

e=68, n=20

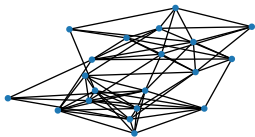

$e=60, n=20$

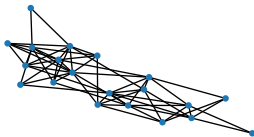

e=64, n=20

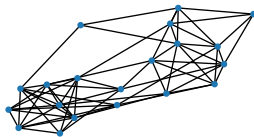

e=71, n=20

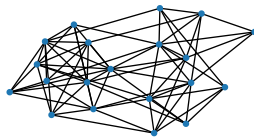

e=64, n=20

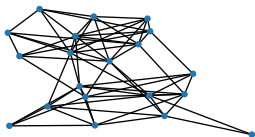

e=71, n=20

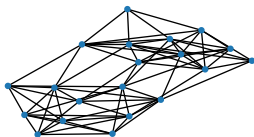

e=69, n=20

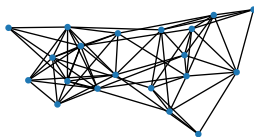

e=77, n=20

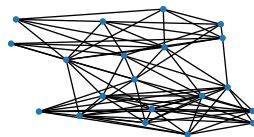

e=69, n=20

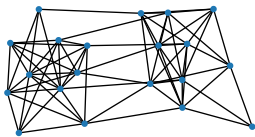

$e=67, n=20$

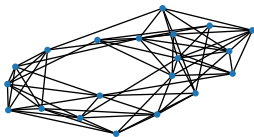

$e=70, n=20$

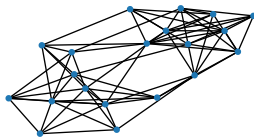

e=67, n=20

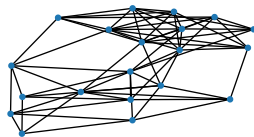

e=68, n=20

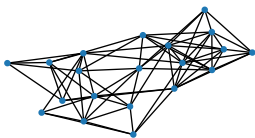

$e=75, n=20$

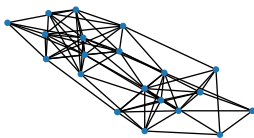

$e=70, n=20$

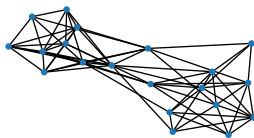

e=67, n=20

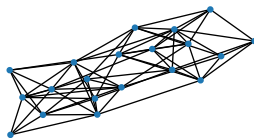

Supplement: supplementary_material [file attachment]
