# Supplementary material (part 9 of 9)
Source: ML conference proceedings conference paper supplement (https://openreview.net/forum?id=qiAxL3Xqx1o)

epoch\_1799\_0.2.pdf

e=61, n=20

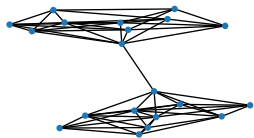

e=58, n=20

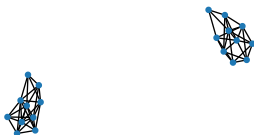

e=58, n=20

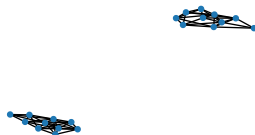

e=60, n=20

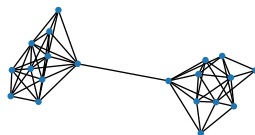

e=60, n=20

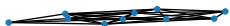

e=62, n=20

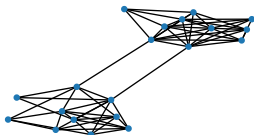

e=62, n=20

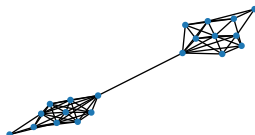

e=57, n=20

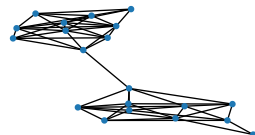

e=57, n=20

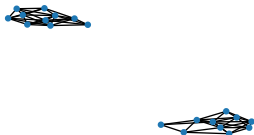

e=60, n=20

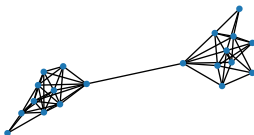

e=61, n=20

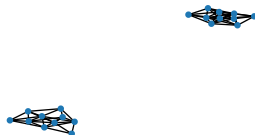

e=62, n=20

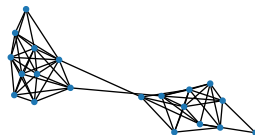

e=62, n=20

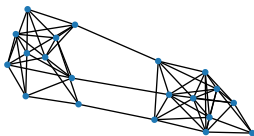

e=63, n=20

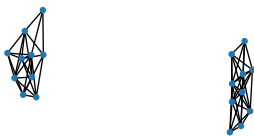

e=61, n=20

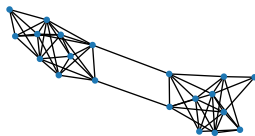

e=57, n=20

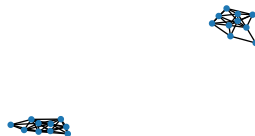

Supplement: supplementary_material [file attachment]

# epoch\_2499\_0.2.pdf

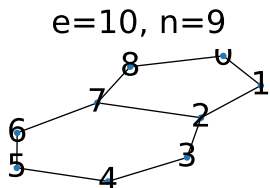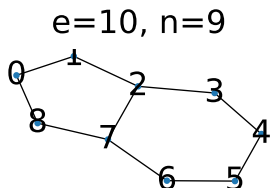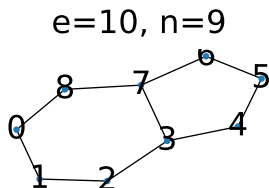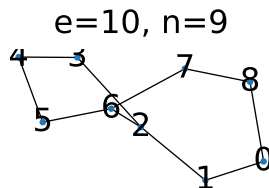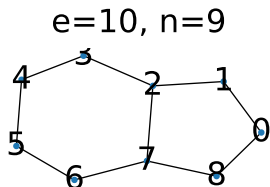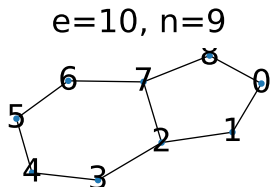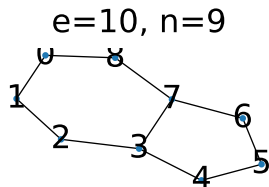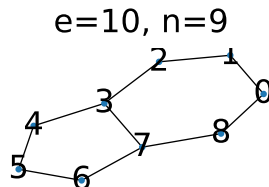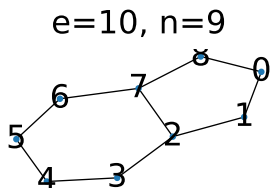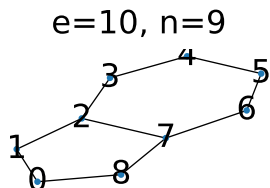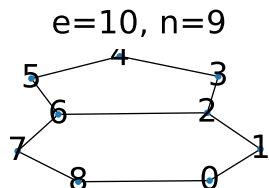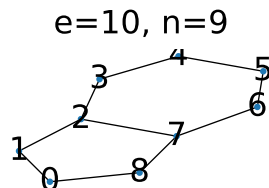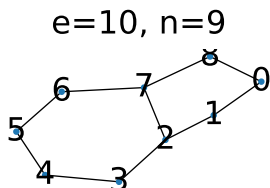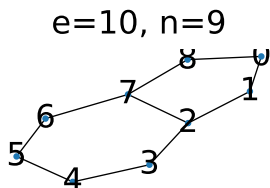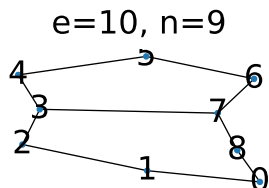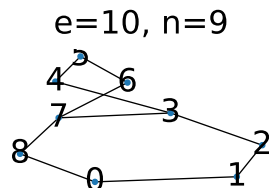

Supplement: supplementary_material [file attachment]

# epoch\_2799\_0.2\_init.pdf

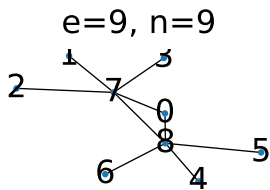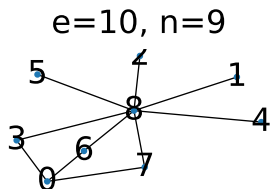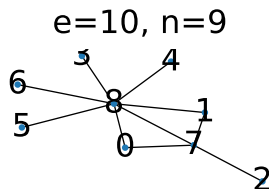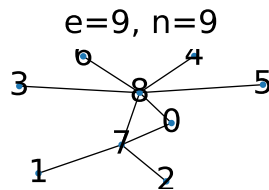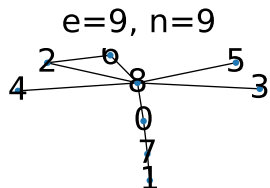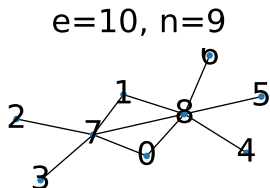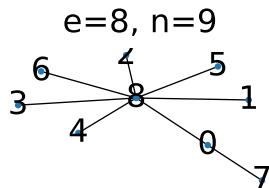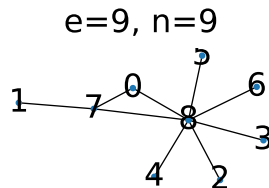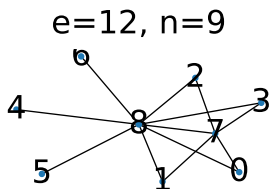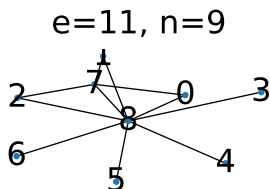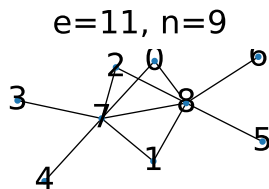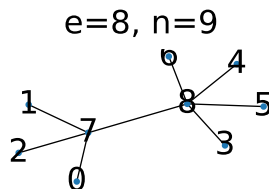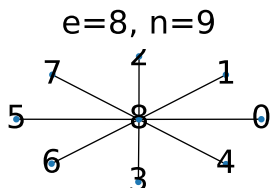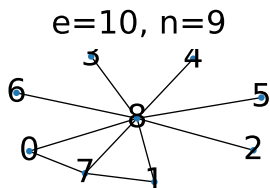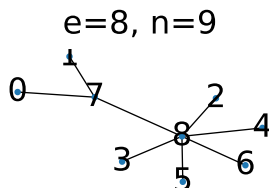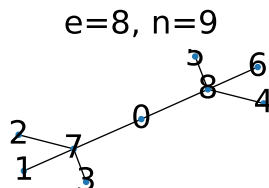

Supplement: supplementary_material [file attachment]

e=98, n=20

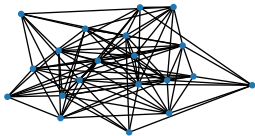

e=97, n=20

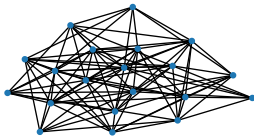

e=89, n=20

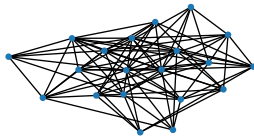

e=87, n=20

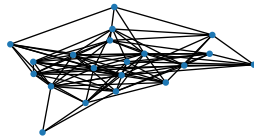

e=74, n=20

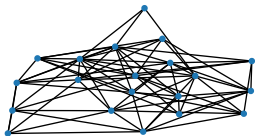

e=87, n=20

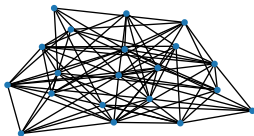

e=84, n=20

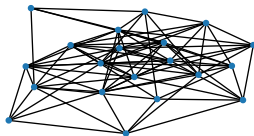

e=92, n=20

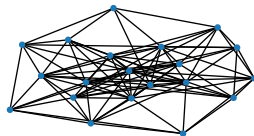

e=94, n=20

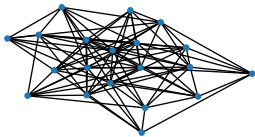

e=87, n=20

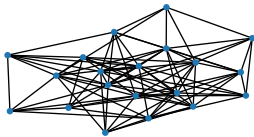

e=77, n=20

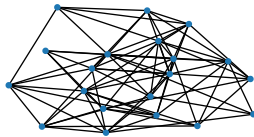

e=81, n=20

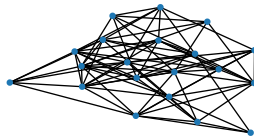

e=77, n=20

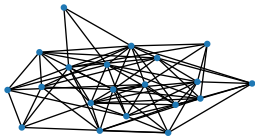

e=89, n=20

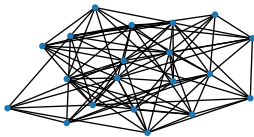

e=83, n=20

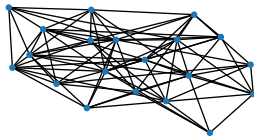

e=94, n=20

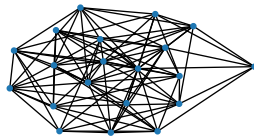

Supplement: supplementary_material [file attachment]

# epoch\_4999\_0.1\_init.pdf

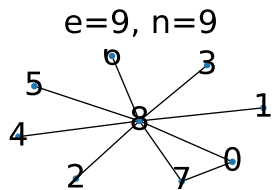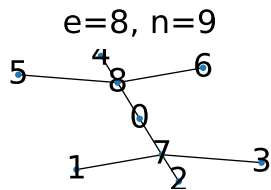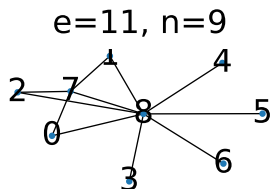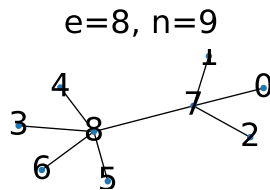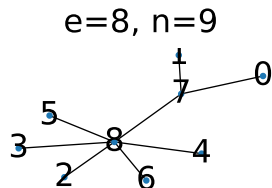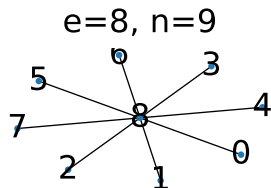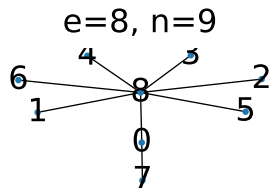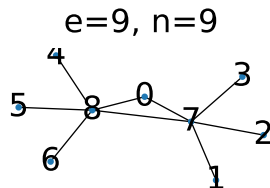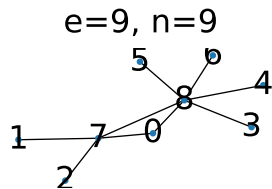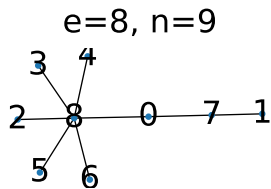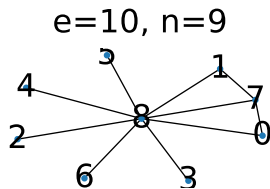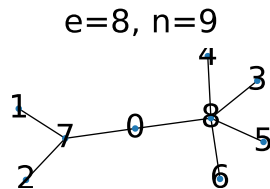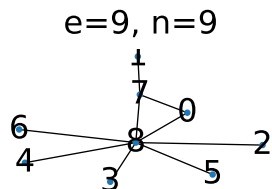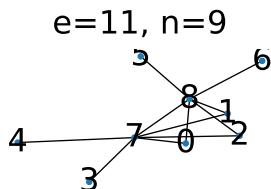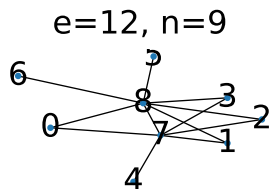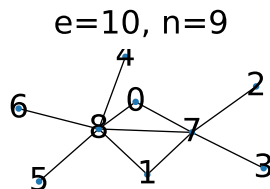

Supplement: supplementary_material [file attachment]

# epoch\_4599\_0.2\_init.pdf

e=10, n=9

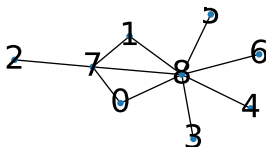

e=9, n=9

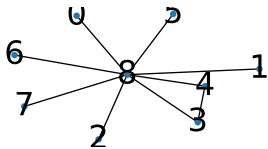

e=9, n=8

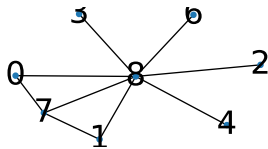

e=10, n=9

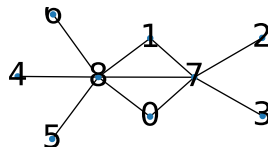

e=9, n=9

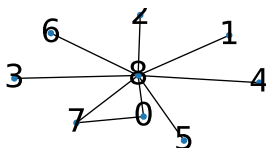

e=11, n=9

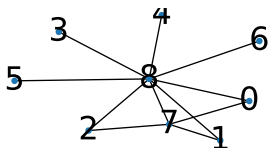

e=8, n=9

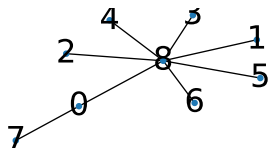

e=12, n=9

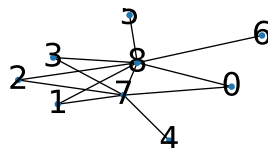

e=8, n=9

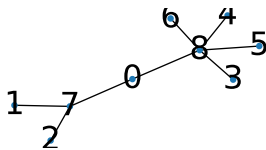

e=11, n=9

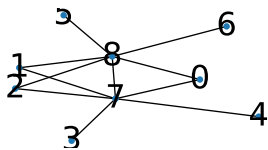

e=13, n=9

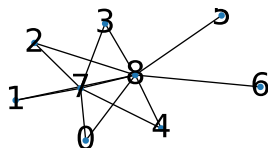

e=9, n=9

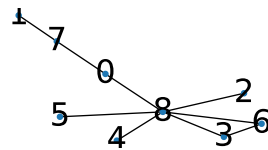

e=10, n=9

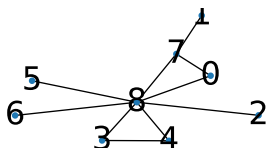

e=8, n=9

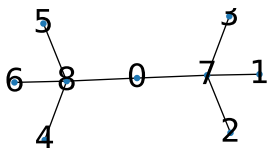

e=11, n=9

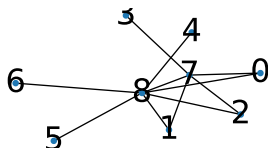

e=8, n=9

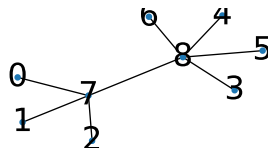

Supplement: supplementary_material [file attachment]

# epoch\_399\_1.6.pdf

e=20, n=9

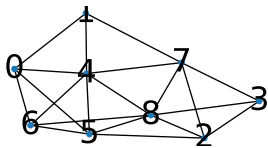

e=12, n=9

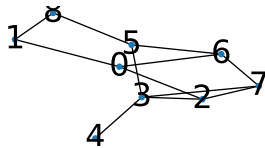

e=16, n=9

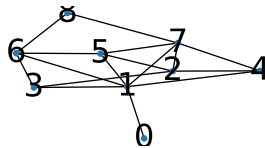

e=10, n=8

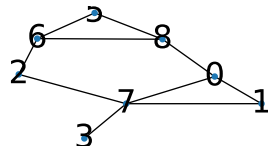

e=10, n=9

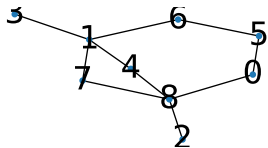

e=16, n=8

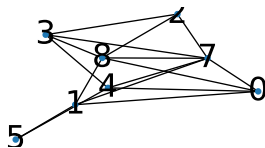

e=15, n=8

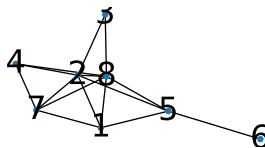

e=23, n=9

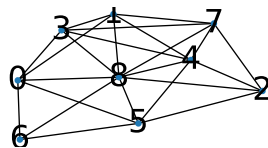

e=17, n=9

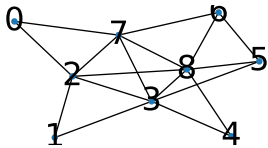

e=15, n=9

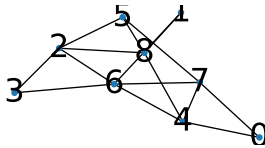

e=22, n=9

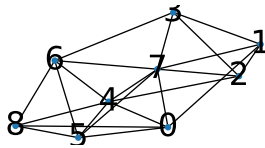

e=14, n=8

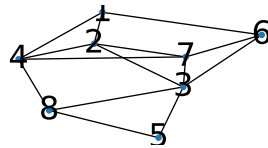

e=9, n=8

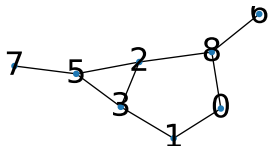

e=15, n=9

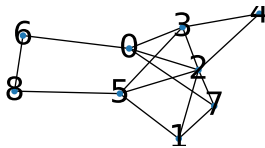

e=18, n=9

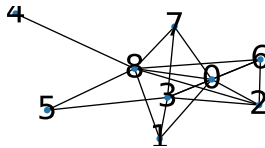

e=11, n=9

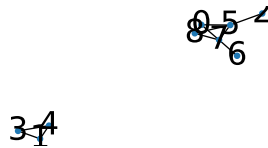

Supplement: supplementary_material [file attachment]

epoch\_4399\_0.2.pdf

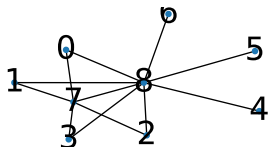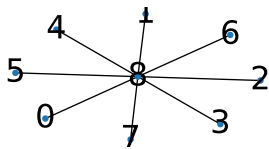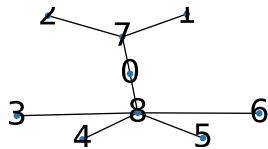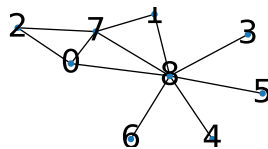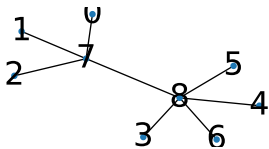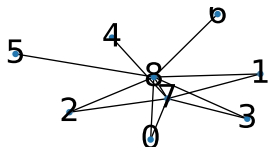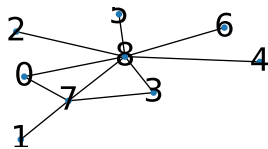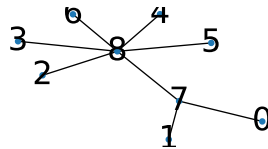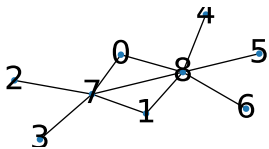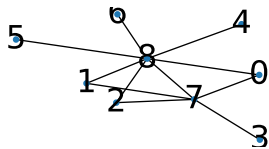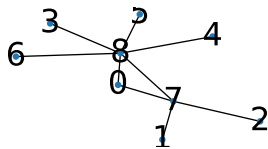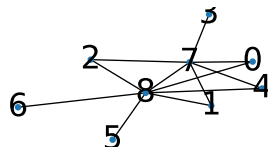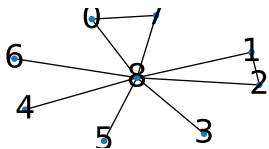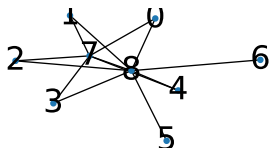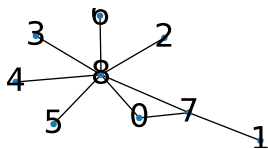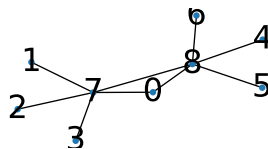

Supplement: supplementary_material [file attachment]

epoch\_599\_0.4\_init.pdf

e=59, n=20

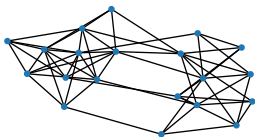

e=73, n=20

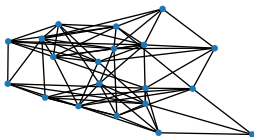

e=73, n=20

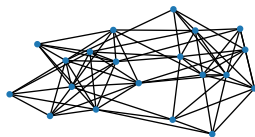

e=64, n=20

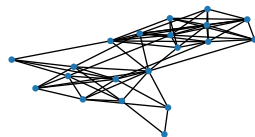

e=70, n=20

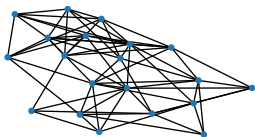

e=72, n=20

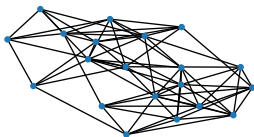

e=66, n=20

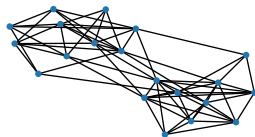

e=75, n=20

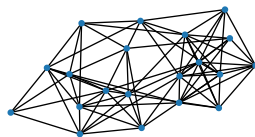

e=67, n=20

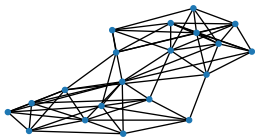

e=64, n=20

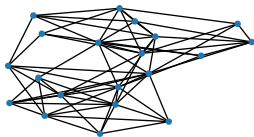

e=68, n=20

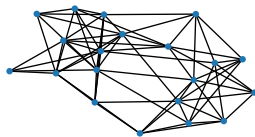

e=68, n=20

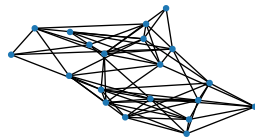

e=62, n=20

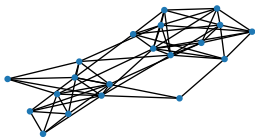

e=69, n=20

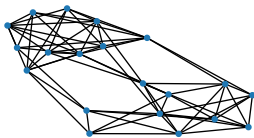

e=74, n=20

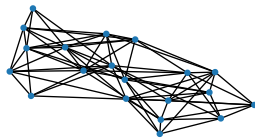

e=77, n=20

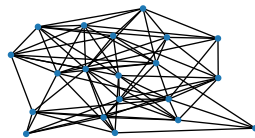

Supplement: supplementary_material [file attachment]

epoch\_199\_1.6.pdf

e=83, n=20

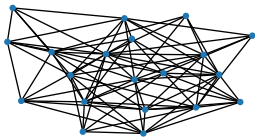

e=83, n=20

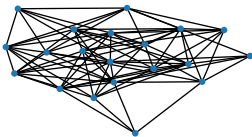

e=85, n=20

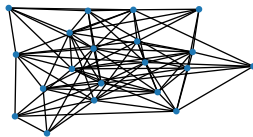

e=82, n=20

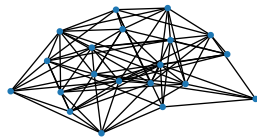

e=78, n=20

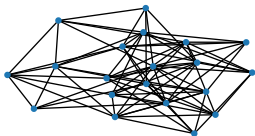

e=83, n=20

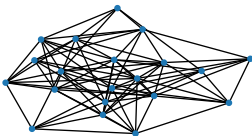

e=86, n=20

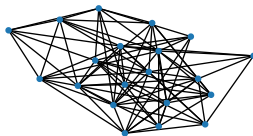

e=99, n=20

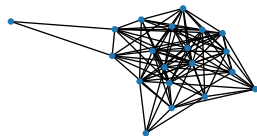

e=76, n=20

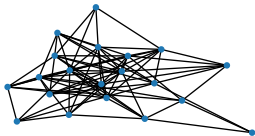

e=82, n=20

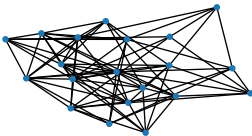

e=75, n=20

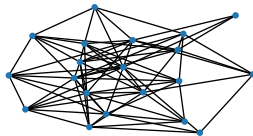

e=70, n=20

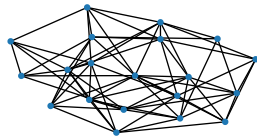

e=83, n=20

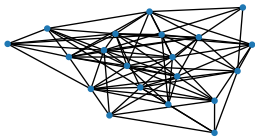

e=73, n=20

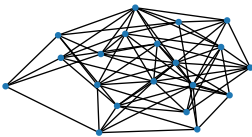

e=83, n=20

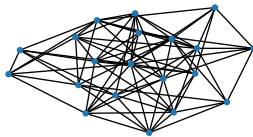

e=79, n=20

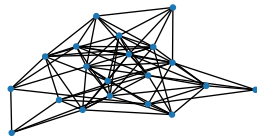

Supplement: supplementary_material [file attachment]

epoch\_199\_0.2\_init.pdf

e=62, n=20

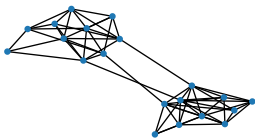

e=62, n=20

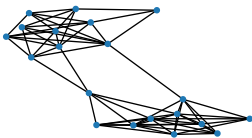

e=61, n=20

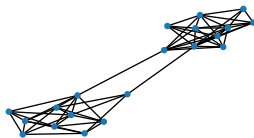

e=61, n=20

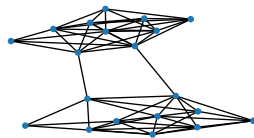

$e=60, n=20$

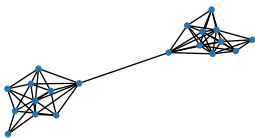

e=63, n=20

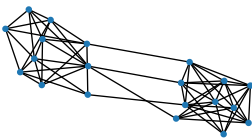

$e=60, n=20$

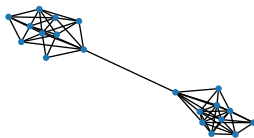

e=60, n=20

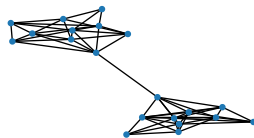

$e=60, n=20$

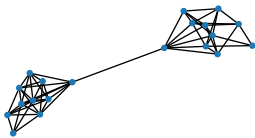

$e=60, n=20$

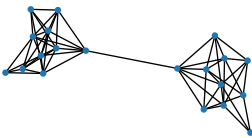

e=60, n=20

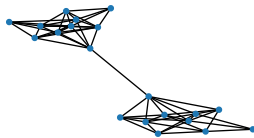

e=60, n=20

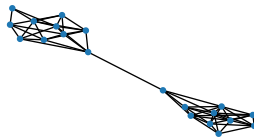

e=60, n=20

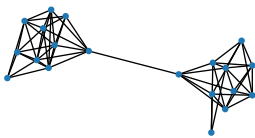

$e=63, n=20$

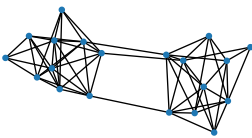

e=62, n=20

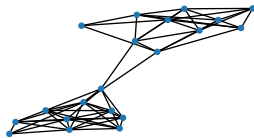

e=64, n=20

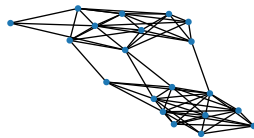

Supplement: supplementary_material [file attachment]

# epoch\_4399\_0.4.pdf

e=14, n=9

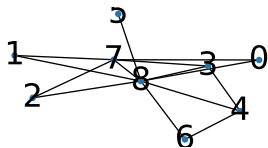

e=10, n=8

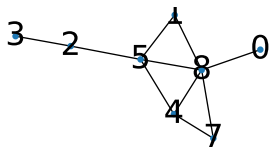

e=12, n=9

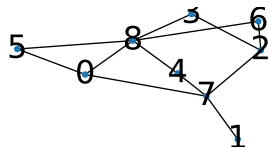

e=11, n=9

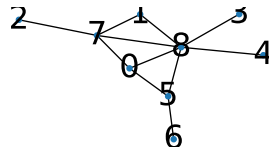

e=9, n=9

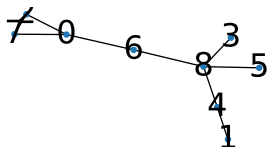

e=13, n=8

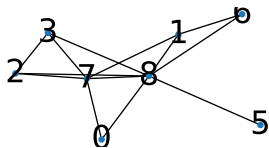

e=8, n=8

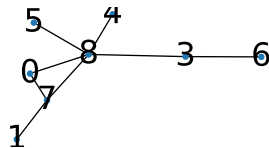

e=10, n=9

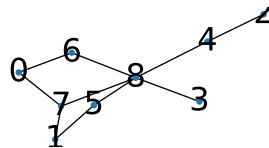

e=14, n=9

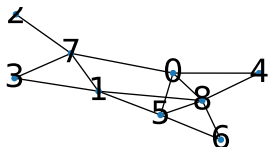

e=14, n=9

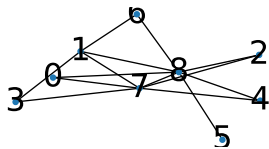

e=9, n=8

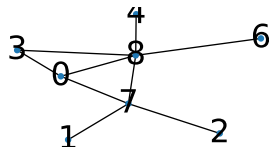

e=11, n=8

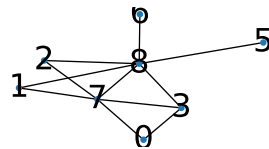

e=10, n=9

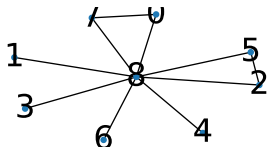

e=15, n=9

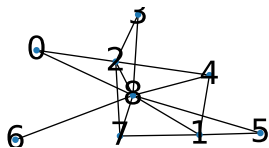

e=13, n=9

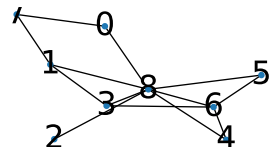

e=8, n=8

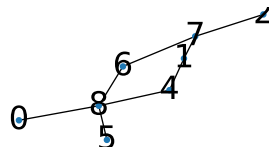

Supplement: supplementary_material [file attachment]

epoch 2999 1.6 init.pdf

$$e=9, n=8$$
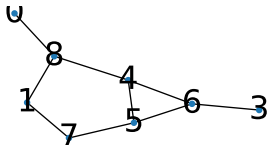
$$e=17, n=9$$
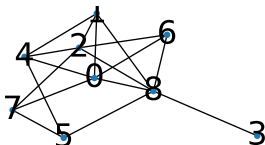
$$e=15, n=9$$
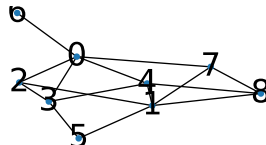

$e=17, n=9$

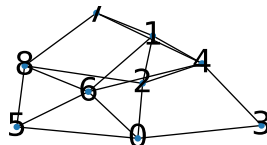

$e=15, n=9$

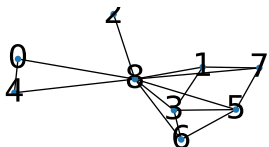

$e=16, n=9$

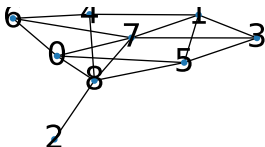
$$e=14, n=9$$
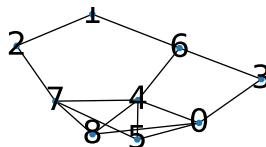

$e=17, n=9$

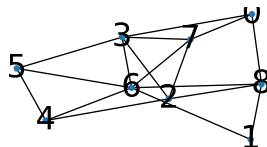

$e=19, n=9$

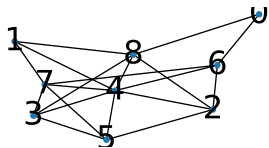

$e=17, n=9$

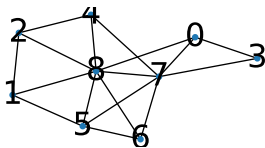
$$e=18, n=9$$
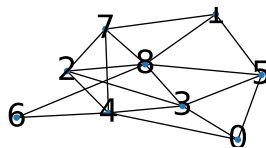
$$e=14, n=9$$
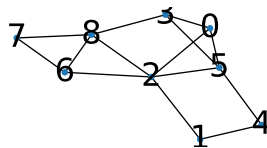

$e=17, n=9$

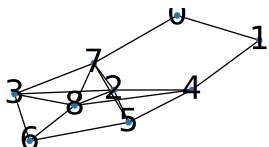
$$e=15, n=9$$
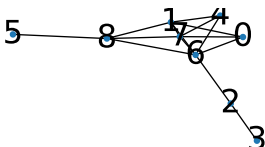

$e=13, n=9$

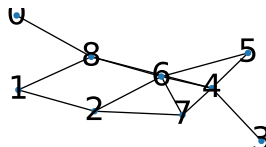

e=17, n=9

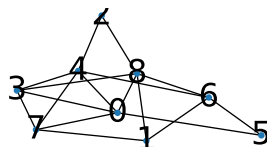

Supplement: supplementary_material [file attachment]

e=69, n=20

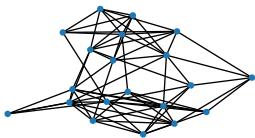

e=65, n=20

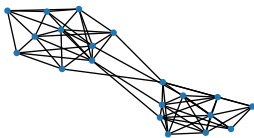

e=67, n=20

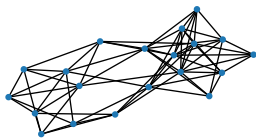

e=73, n=20

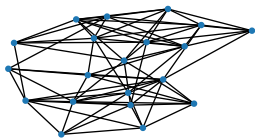

e=65, n=20

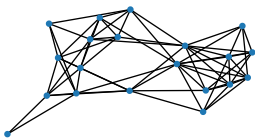

$e=67, n=20$

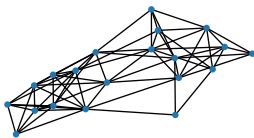

e=65, n=20

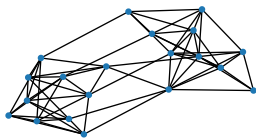

e=75, n=20

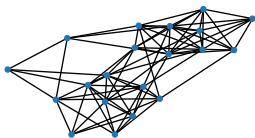

$e=69, n=20$

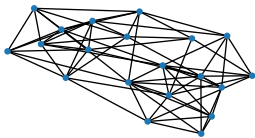

e=65, n=20

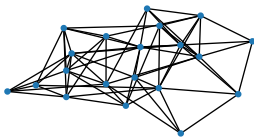

e=62, n=20

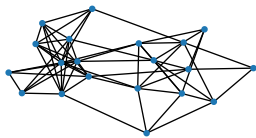

e=73, n=20

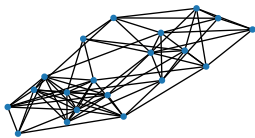

e=66, n=20

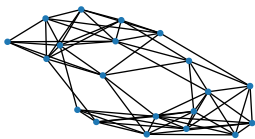

e=65, n=20

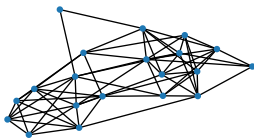

e=69, n=20

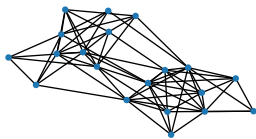

e=73, n=20

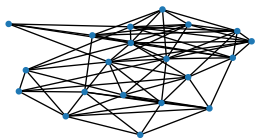

Supplement: supplementary_material [file attachment]

# epoch\_3799\_0.4.pdf

e=14, n=9

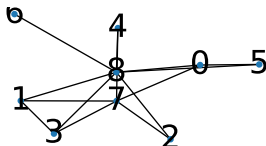

e=12, n=9

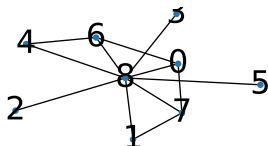

e=14, n=9

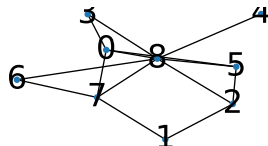

e=11, n=9

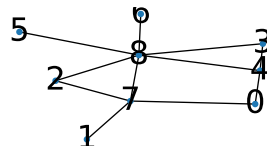

e=10, n=9

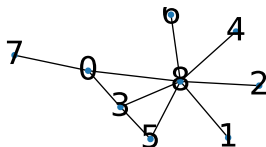

e=13, n=9

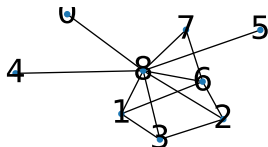

e=12, n=9

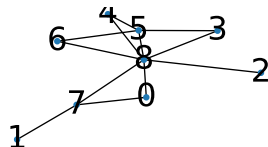

e=11, n=9

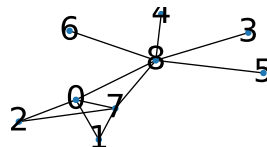

e=12, n=9

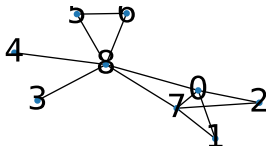

e=16, n=9

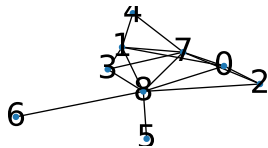

e=15, n=9

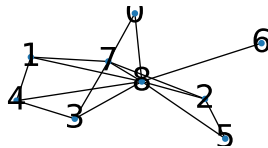

e=11, n=9

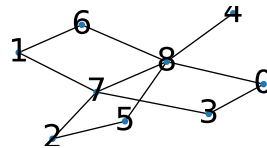

e=12, n=8

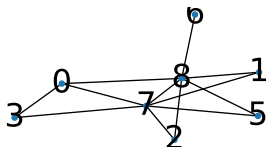

e=11, n=9

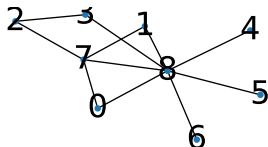

e=14, n=9

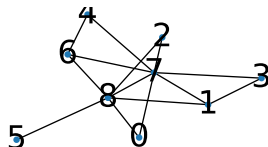

e=10, n=9

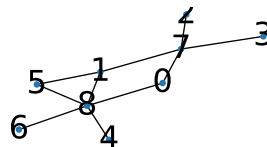

Supplement: supplementary_material [file attachment]

# epoch\_4999\_0.4.pdf

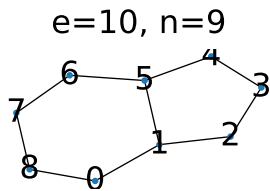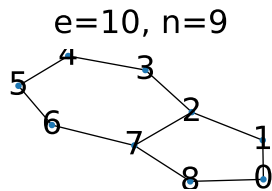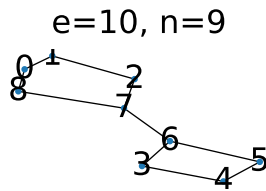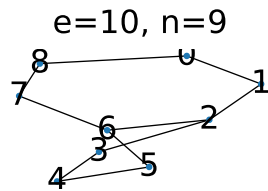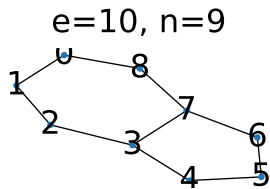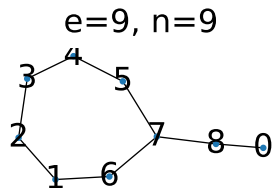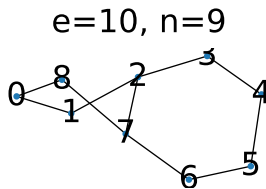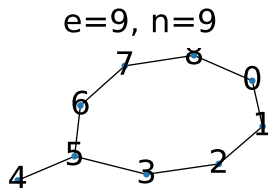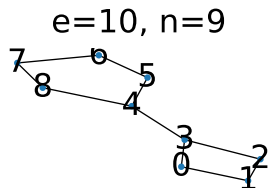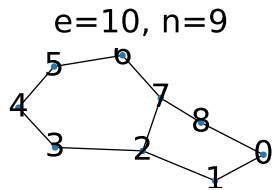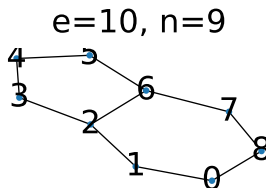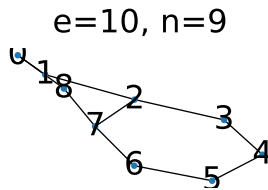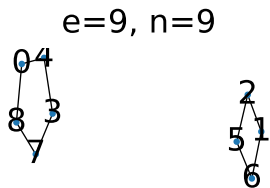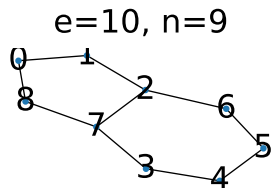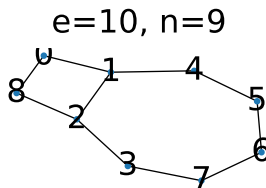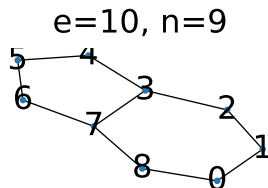

Supplement: supplementary_material [file attachment]

# epoch\_3599\_1.6\_init.pdf

e=20, n=9

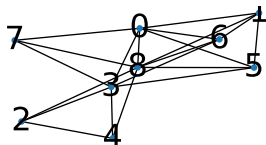

e=14, n=9

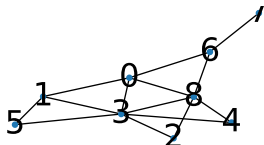

e=15, n=9

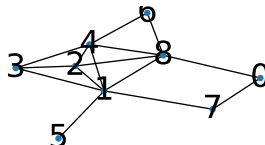

e=9, n=7

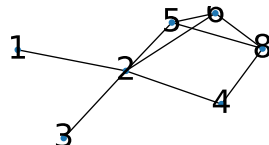

e=14, n=9

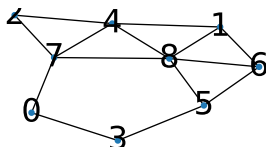

e=15, n=9

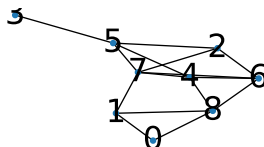

e=13, n=9

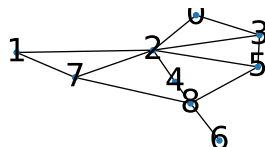

e=15, n=9

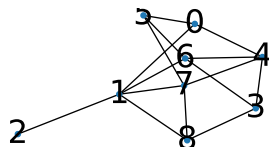

e=16, n=9

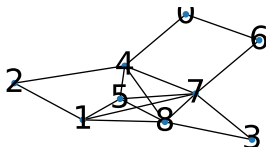

e=18, n=9

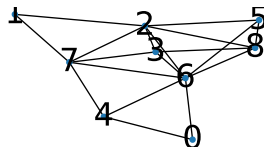

e=15, n=9

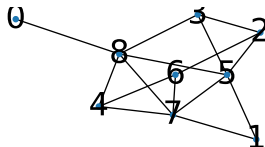

e=14, n=9

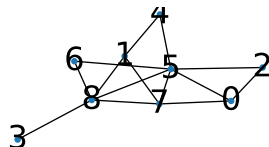

e=13, n=9

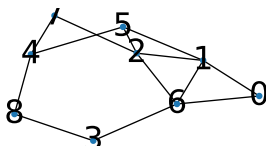

e=16, n=9

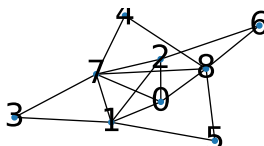

e=23, n=9

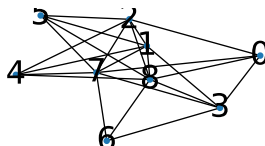

e=18, n=9

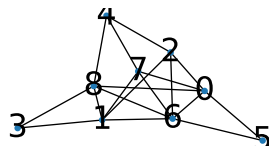

Supplement: supplementary_material [file attachment]

# epoch\_2199\_0.1\_init.pdf

e=8, n=9

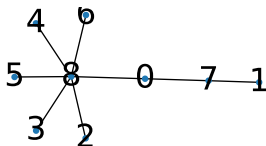

e=13, n=9

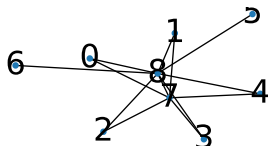

e=8, n=9

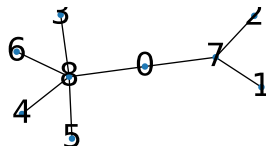

e=11, n=9

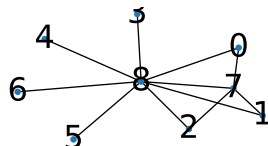

e=8, n=9

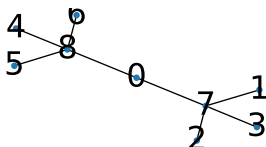

e=8, n=9

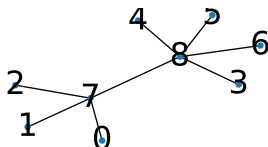

e=12, n=9

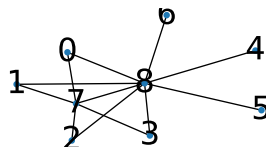

e=10, n=9

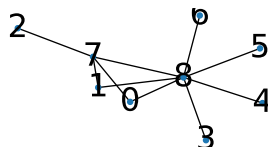

e=8, n=9

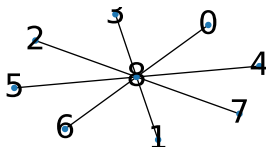

e=9, n=9

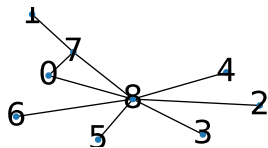

e=8, n=9

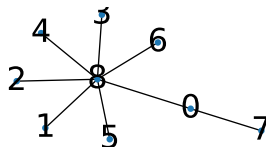

e=9, n=9

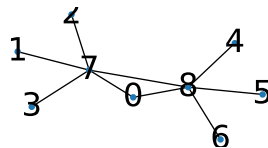

e=9, n=9

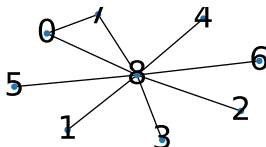

e=8, n=9

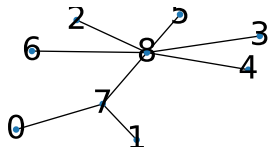

e=10, n=9

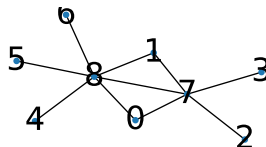

e=10, n=9

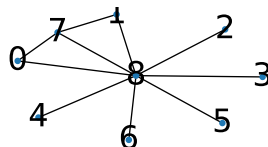

Supplement: supplementary_material [file attachment]

# epoch\_3799\_0.4\_init.pdf

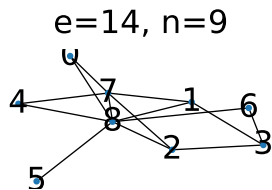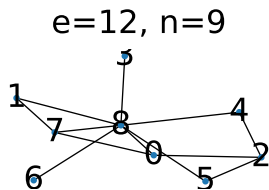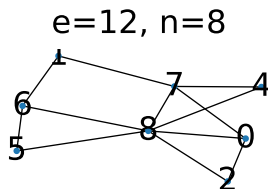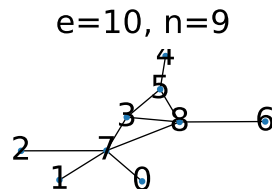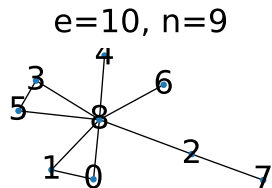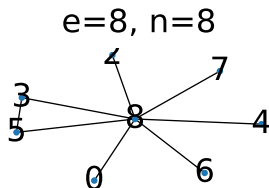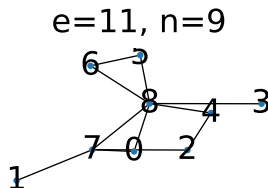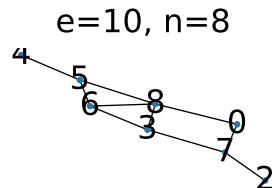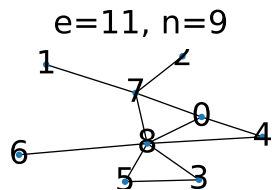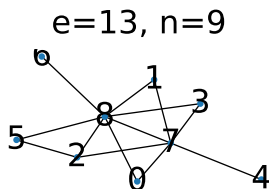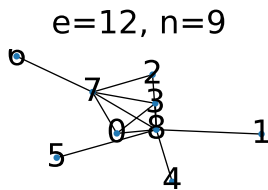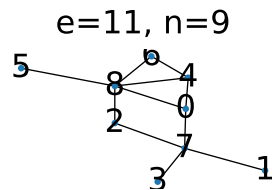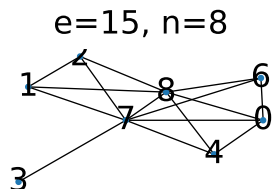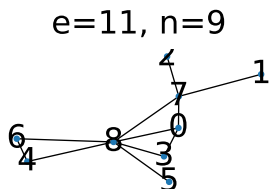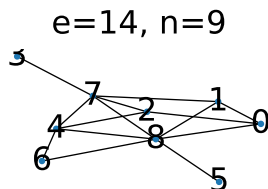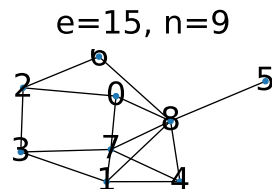

Supplement: supplementary_material [file attachment]

e=8, n=9

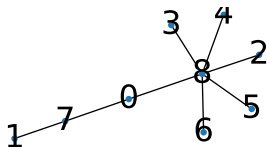

e=12, n=9

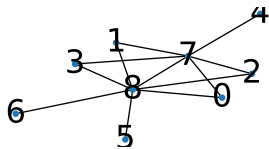

e=11, n=9

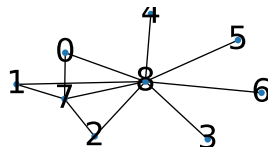

e=10, n=9

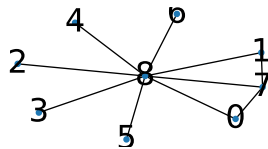

e=12, n=9

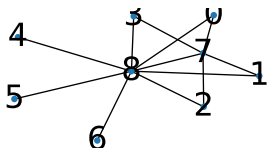

e=11, n=9

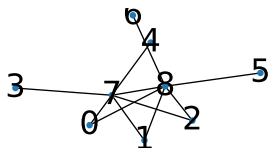

e=10, n=9

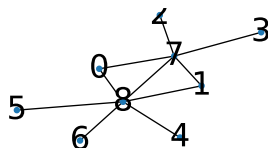

e=9, n=9

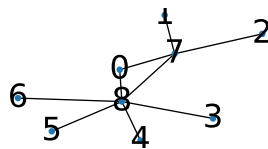

e=8, n=9

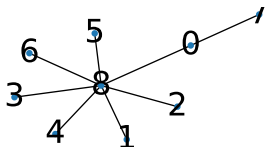

e=9, n=9

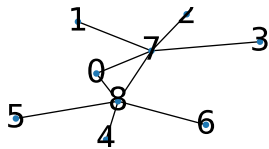

e=11, n=9

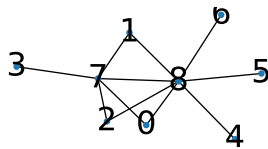

e=8, n=9

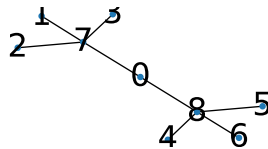

e=9, n=9

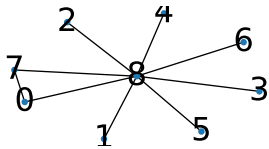

e=8, n=9

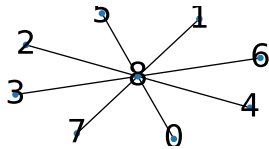

e=10, n=9

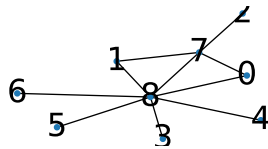

e=13, n=9

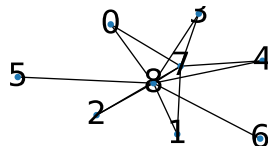

Supplement: supplementary_material [file attachment]

epoch 4399 0.8 init.pdf

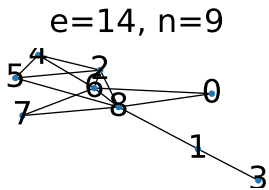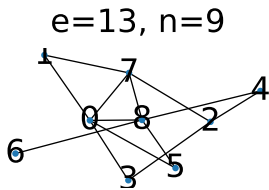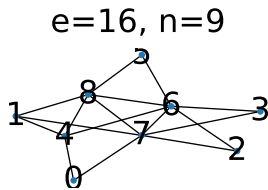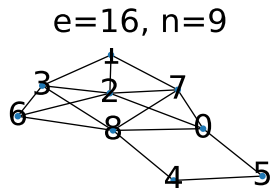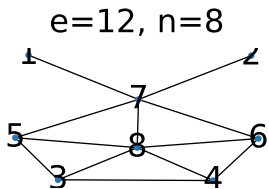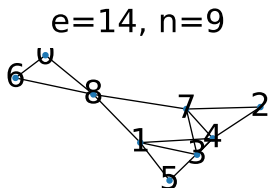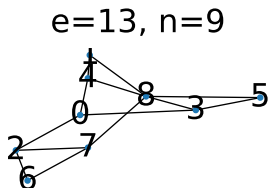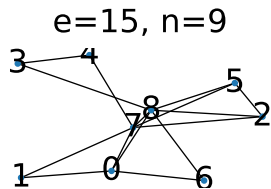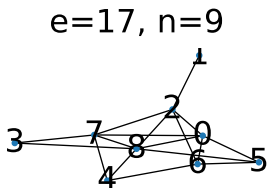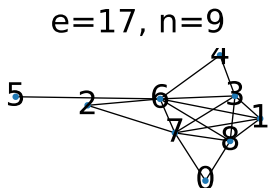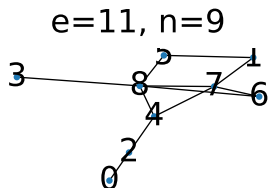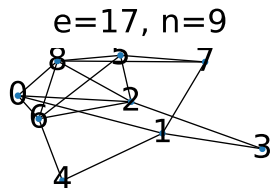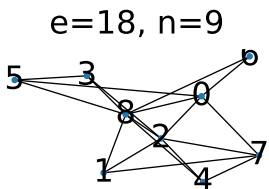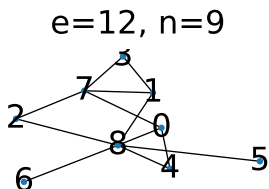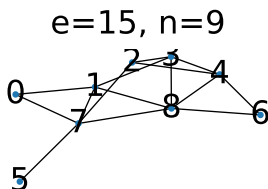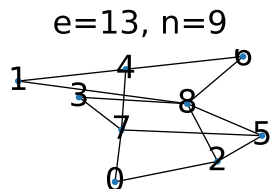

Supplement: supplementary_material [file attachment]

# epoch\_4199\_0.6.pdf

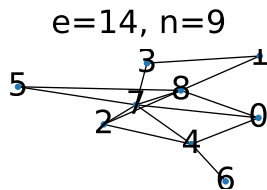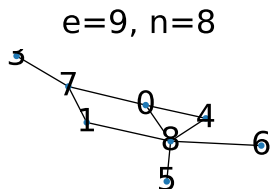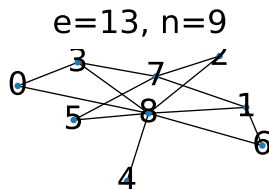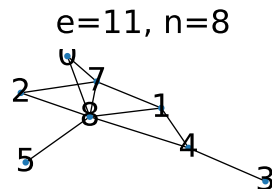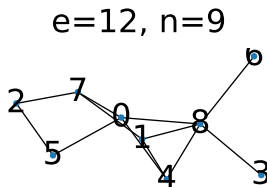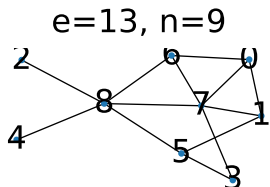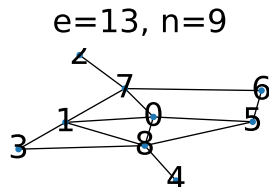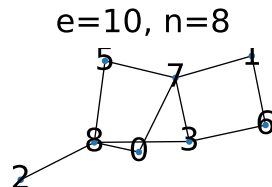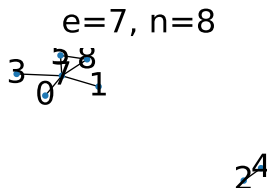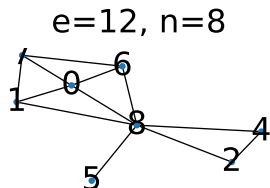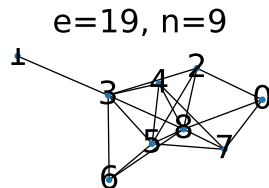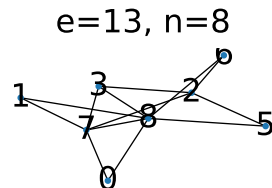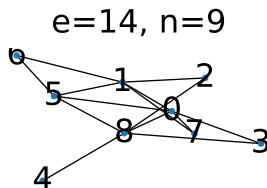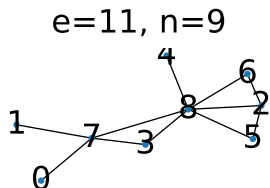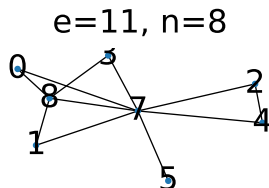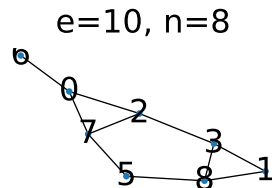

Supplement: supplementary_material [file attachment]
